# Supplementary material
Source: PubMed Central journal article supplement (PMC6487330)
Supplement: awz066_supplementary_material.pdf [file awz066_supplementary_material.pdf]

## Supplementary Information

### Supplementary Methods

#### MS and MS/MS acquisition and data processing settings

Both LC systems were connected through Thermo Scientific SII for Xcalibur 1.3.0.73 with Chromeleon 7.2.4.8179 for LC control. The acquisition software used was Thermo Foundation 3.1.64.11 with Xcalibur 3.1.66.10 and instrument configuration Q Exactive - Orbitrap MS 2.8 SP1 build 2806.

#### *Comments on acquisition settings and data analysis*

The instrument settings commonly used for proteolytic peptides frequently result in failure to acquire MS/MS spectra for larger peptides even though the signal intensity is well above the required threshold. Generally it is desirable to enable the “Peptide match” selection, which would assign the monoisotopic peak  $m/z$  of the precursor to the fragment ion acquisition. This way the precursor  $m/z$  does not require correction prior to database search. With larger peptides this feature could not be enabled and therefore a more specialized processing program is required, such as Mascot Distiller or PEAKS Studio. Use of these programs are also desirable for other reasons as well. For example, Mascot takes into account only singly and doubly charged fragment ions, and for precursors with higher charge state than 3, fragment

ions with charge states  $>2$  are produced. To include these, the software must deconvolute multiply charged ions into singly charged ions (or non-charged species).

We were unable to access a software that did not require prior knowledge of the mass of the link. A program allowing a liberal mass tolerance setting would have been useful; unfortunately a large tolerance of tens or hundreds of Da is typically not allowed. Therefore, the search strategy was to construct a large amount of different PTMs consisting of possible combinations of peptides and links. In the particular case with dimers, PEAKS Studio 8.5 worked well enough since it was possible to perform searches with a large amount of modifications. To speed up the processing we constructed 2 small databases, one containing only APP isoforms and one containing only A $\beta$ 1-43.

Once the nature of the link was established, both Mascot Distiller and PEAKS Studio were able to process both intact and tryptic dimer data; PEAKS Studio, however, provided a smoother workflow. We also took advantage of the Xcalibur's built-in Xtract function to charge and isotope deconvolute spectra. The deconvoluted peak lists produced by PEAKS Studio and Xtract differed to some extent and we combined them to obtain more complete fragment ion lists for the intact dimers. The lists were also validated manually against the unprocessed fragment ion acquisition to ensure that the data produced by the algorithms were trustworthy.

Deconvolution algorithms are often very good at computing the correct monoisotopic mass even when the monoisotopic peak is not seen in the spectrum. However, when the signal is not excellent the isotopic envelope is difficult to fit to a theoretical distribution and a mass error of 1 or 2 Da can be the result. This is especially the case with larger fragment ions since signal is

lost in the fragmentation process and additional ion transfer. Therefore, the database search software was set to accept an error of 1.2 Da. Further, when analyzing samples such as the A $\beta$  dimers, one should not rely on the database searches for final identification; it is rather a tool to obtain lists of suggestions for putative dimers. Even though it is reassuring to obtain assignments through the database software, it was essential with additional evaluation of the fragment ion spectra. In-house written scripts were used to process deconvoluted fragment ion data both from PEAKS Studio and Xcalibur's Xtract function and obtain lists of matching b- and y-series, which assisted in the identification.

The scores given by PEAKS Studio were low for the dimers (the scores for the monomer data is in a different league). The search engine is, however, not adapted to dimeric species (one of the chains was treated as a PTM) and the given scores are difficult to interpret. We chose to include them anyway, but have also supplied the number of manually validated b- and y-ions. Supplementary Table 2 shows all acquisitions from one LC-MS/MS run where the fragment ion data clearly supported the molecular species. In the table the mass deviation for the precursor masses are given both in ppm and Da; it can be seen that the deviation is very close to an integer value, which fits well with an isotope mismatch of up to 2 Da. Moreover, in the precursor mass spectra (Fig. 3b and Supplementary Fig. 13) it can be seen that there was an extensive overlap of species with similar  $m/z$  and retention time making accurate assignment of the monoisotopic peak very difficult. Since there was an abundance of ions detected in the precursor acquisitions, the injection times also became relatively short; hence the true ion signal was low for every molecular ion, contributing to the noisy appearance. Indeed, we set

the acquisition range to 1200-2000  $m/z$  units in order to obtain good data for the dimers; a normal acquisition range of 400-2000  $m/z$  units produced essentially no signal above  $m/z$  1200.

The situation was very different for the MS/MS acquisitions, which due to the narrow isolation window of 3  $m/z$  units could have long injection times and therefore a comparatively good signal could be obtained for the fragment ions belonging to the isolated species. Here the spectra were quite clean with low background, allowing for decent deconvolution conditions as well as good manual inspection conditions. The problem with incorrect monoisotopic assignment was still there, but for these peaks (in our case rarely suffering from overlap) the error was almost always either  $\sim 0$  Da or  $\sim +1$  Da. Because of the shape of the isotopic distribution an isotope mismatch error will always have a positive value unless there are peak overlaps. In the end all MS and MS/MS acquisitions presented were carefully examined manually and fragment ion acquisitions not having a clear A $\beta$  fragment profile, as well as a fitting precursor ion mass, were discarded. All approved MS/MS acquisitions had fragment intensity distributions matching those of monomeric A $\beta$ , particularly the characteristic high abundance b-ions in the b30-b40 range which can be seen in Supplementary Figs. 11-13.

Spectra from digested samples were also subjected to analysis by Trans-Proteomic Pipeline/Kojak. This software allows analysis of linked peptides. Also, here the link mass has to be known beforehand, which limits the usefulness when the objective is to screen for peptides with and endogenous, unknown link. Nevertheless, once the number of linking possibilities had been narrowed down to water and ammonia loss TPP/Kojak was a handy tool to confirm findings and also suggest other linked peptide variants.



Hitherto, we have not found a really smooth workflow but are still relying on a combination of software with some manual data handling in between. By using in-house developed scripts simpler data extraction can be semi-automated, which reduces analysis time significantly.

***Mascot Daemon search parameters – search using Mascot Distiller for spectrum processing***

All searches [Database = custom made Abeta1-43, APP human isoforms, Uniprot\_SwissProt; Fixed modifications = none; Variable modifications = Oxidation (M), Glu→pyro-Glu (N-term E), and various “dimer PTMs”; Decoy = not enabled; Enzyme = none; Max. missed cleavages = not relevant; Monoisotopic = selected; Peptide charge = 1+; Peptide tol. = 20 ppm (digested samples)/1.2 Da (intact samples); #13C = 0].

MS/MS [MS/MS ion search = enabled; Error tolerant search = not enabled; Data format = Mascot generic; MS/MS tolerance = 50 mmu (digested samples)/1.2 Da (intact samples); Quantitation = none; instrument type = CID fragment type spectra – all singly charged *b*- and *y*-ions].

Data import filter = Mascot Distiller [Data File Format = ThermoXcalibur; Default for unknown scan type = Profile/continuum; Data import filter options: Mascot Distiller Processing Options = see below; Multi-Sample Files = Separate search for each sample; Peak List Format = MGF; Intensity values = Area; Scan Range (multi-scan files) = sample dependent; Distiller Project File Save = enabled; Output PMF Masses as = MH+; Output MS/MS Fragments as = MH+].

### ***Mascot Distiller Processing Options***

MS Processing: Un-centroiding [Peak half width = 0.025; Data points per Da = 100; Data points per Da = 100; Always uncentroid = enabled]; Re-gridding [Data points per Da = 100]; Multi-Format Spectrum [Preferred type = Profile]; Peaks [Minimum number = 1; Maximum charge = 15]; Aggregation [Scan group aggregation method = Sum].

MS/MS Processing: Un-centroiding [Peak half width = 0.025; Data points per Da = 100; Data points per Da = 100; Always uncentroid = enabled]; Re-gridding [Data points per Da = 100]; Multi-Format Spectrum [Preferred type = Profile]; Peaks [Minimum number = 8; Maximum charge = N/A; Use precursor charge as maximum = enabled]; Precursor Charge [1st choice = Try to re-determine charge from parent scan; 2nd choice = If available, take charge from file; 3rd choice = Use default charge(s); Default charge range = 2 to 15; Ignore singly charged precursors = not enabled]; Precursor Selection [Search within m/z tolerance of = 2.5 Da; Re-determine precursor m/z value when possible = enabled; Maximum number of precursor m/z values = 1]; Aggregation [Scan group aggregation method = Time Domain].

Time Domain: Group assignment [Minimum precursor mass (Mr) = 700; Maximum precursor mass (Mr) = 16 000; Precursor m/z tolerance = 0.01; Maximum intermediate time (secs) = 0; Maximum intermediate scan count = dimmed; Use intermediate scan count when possible = not enabled]; Group Filtering [Minimum number of scans = 1]. Group combination [Sum MSn scans into MS2 = enabled].

MS Peak Picking: Filtering [Correlation threshold (Rho) = 0.5; Minimum signal to noise (S/N) = 5; Minimum peak m/z = 50; Maximum peak m/z = 100 000]; Peak profile [Minimum peak width

(Da) = 0.001; Expected peak width (Da) = 0.025; Maximum peak width (Da) = 0.5; Reject width outliers = not enabled]; General [Apply baseline correction = not enabled; Fit method = Isotope Distribution; Maximum peak iterations per scan = 500]; Single Peak Window [Pick single peaks in this range (e.g. reporter ions) = not enabled; other parameters dimmed].

MS/MS Peak Picking: General [Same as MS Peak Picking = enabled; other parameters dimmed].

### ***PEAKS Studio 8.5 processing parameters (typical)***

Create Project options: [Instrument type = Orbitrap (Orbi-Orbi); Fragment = HCD]. Data

Refinement options: [Merge Scans = not enabled (except for intact #1185 dimer sample);

Correct Precursor = enabled; Mass only (recommended) = enabled; Filter Scans = not enabled].

Identification options: [Error Tolerance: Precursor mass = 20 ppm (digested samples)/1.2 Da

(intact samples) using monoisotopic mass; Fragment ions = 0.05 Da (digested samples)/1.2 Da

(intact samples); Enzyme = None; Selected Fixed PTM = none; Selected Variable PTM =

Oxidation (M), Pyro-glu from E, and various “dimer PTMs”; max variable PTM per peptide = 3 to

6; Database = custom made Abeta1-43, APP human isoforms; Uniprot\_SwissProt].

### ***Specific PEAKS Studio 8.5 processing parameters for scores given in Supplementary Table 1***

Create Project options: [Instrument type = Orbitrap (Orbi-Orbi); Fragment = HCD]. Data

Refinement options: [Merge Scans = not enabled; Correct Precursor = enabled; Mass only

(recommended) = enabled; Filter Scans = not enabled]. Identification options: [Error Tolerance:

Precursor mass = 20 ppm using monoisotopic mass; Fragment ions = 0.05 Da; Enzyme = None; Selected Fixed PTM = none; Selected Variable PTM = Oxidation (M), Pyro-glu from E, Deamidation (NQ), Formylation(K, peptide N-term); Hydrogen dodecyl sulfate adduct; max variable PTM per peptide = 3; Database = custom made Abeta1-43].

***Specific PEAKS Studio 8.5 processing parameters for scores given in Supplementary Table 2***

Create Project options: [Instrument type = Orbitrap (Orbi-Orbi); Fragment = HCD]. Data Refinement options: [Merge Scans = not enabled; Correct Precursor = enabled; Mass only (recommended) = enabled; Filter Scans = not enabled]. Identification options: [Error Tolerance: Precursor mass = 1.2 Da using monoisotopic mass; Fragment ions = 1.2 Da; Enzyme = None; Selected Fixed PTM = none; Selected Variable PTM = Oxidation (M), Pyro-glu from E, Formylation (K, peptide N-term); Hydrogen dodecyl sulfate adduct, and 25 “dimer PTMs” with -H<sub>2</sub>O link (Ab1-37, 1-38, 1-39, 1-40, 1-42, 2-37, 2-38, 2-39, 2-40, 2-42, 3-37, 3-38, 3-39, 3-40, 3-42, Pyro-glu3-37, Pyro-glu3-38, Pyro-glu3-39, Pyro-glu3-40, Pyro-glu3-42); max variable PTM per peptide = 3; Database = custom made Abeta1-43].

***Trans-Proteomic Pipeline/Kojak processing parameters***

Contents of the Kojak .conf parameter file:

```
# Kojak version 1.5.5 parameter file

# Please see online documentation at:

# http://www.kojak-ms.org/param

# All parameters are separated from their values by an equals sign ('=')

# Anything after a '#' will be ignored for the remainder of the line.

#

# Computational resources

threads = 4 #Increase to use more cores/nodes

#

# Data input files: include full path if not in current working directory

#

database = c:/TPP/data/dbase/Abeta.fasta # local Abeta database

export_percolator = 1

export_pepXML = 1

MS_data_file = my_data.mzML

percolator_version = 3.0

#

# Parameters used to described the data being input to Kojak

#

enrichment = 0 #Values between 0 and 1 to describe 18O APE.

#For example, 0.25 equals 25 APE.

instrument = 0 #Values are: 0=Orbitrap, 1=FTICR (such as Thermo LTQ-FT)
```

```

MS1_centroid = 0 #0=no, 1=yes
MS2_centroid = 1 #0=no, 1=yes
MS1_resolution = 50000 #Resolution at 400 m/z, value ignored if data are
                        #already centroided
MS2_resolution = 50000 #Resolution at 400 m/z, value ignored if data are
                        #already centroided

#
# Cross-link and mono-link masses allowed. May have more than one of each parameter.
#
# Format for cross_link is [amino acids] [amino acids] [mass mod] [identifier]
# Format for mono_link is [amino acids] [mass mod]
# One or more amino acids (uppercase only!!) can be specified for each linkage moiety
# Use lowercase 'n' or 'c' to indicate protein N-terminus or C-terminus
#
cross_link = ACDEFGHIKLMNPQRSTVWY ACDEFGHIKLMNPQRSTVWY -18.010565
            -H2O
#
# Fixed modifications. Add as many as necessary.
#
fixed_modification = C 57.02146
fixed_modification_protC = 0
fixed_modification_protN = 0

```

```
#  
  
# Differential modifications. Add as many as necessary. Uppercase only for amino acids!  
  
# n = peptide N-terminus, c = peptide C-terminus  
  
#  
  
# If more than one modification is possible for an amino acid,  
  
# list all modifications on separate lines  
  
#  
modification = M 15.9949  
modification_protC = 0  
modification_protN = 0  
diff_mods_on_xl = 0  
max_mods_per_peptide = 2  
mono_links_on_xl = 0  
  
#  
  
# Digestion enzyme rules.  
  
#  
  
# See http://www.kojak-ms.org/param/enzyme.html  
  
#  
enzyme = [DKR] | {P} All_Abeta # when entering all amino acids searches failed  
  
#  
  
# Scoring algorithm parameters  
  
#
```

# fragment\_bin\_offset and fragment\_bin\_size influence algorithm precision and memory usage.

# They should be set appropriately for the data analyzed.

# For ion trap ms/ms: 1.0005 size, 0.4 offset

# For high res ms/ms: 0.03 size, 0.0 offset

#

fragment\_bin\_offset = 0.4 #between 0.0 and 1.0

fragment\_bin\_size = 1.0005 #in Thomsons

ion\_series\_A = 0

ion\_series\_B = 1

ion\_series\_C = 0

ion\_series\_X = 0

ion\_series\_Y = 1

ion\_series\_Z = 0 #Z-dot values are used

#

# Additional parameters used in Kojak analysis

#

decoy\_filter = DECOY #identifier for all decoys in the database.

#Default value is "random" (without quotes)

isotope\_error = 1 #account for errors in precursor peak identification.

#Searches this number of isotope peak offsets.

#Values are 0,1,or 2.

max\_miscleavages = 2 #number of missed trypsin cleavages allowed



```

max_peptide_mass = 5000.0 #largest allowed peptide mass in Daltons
min_peptide_mass = 400.0 #lowest allowed peptide mass in Daltons
max_spectrum_peaks = 0 #top N peaks to use during analysis. 0 uses all peaks.
ppm_tolerance_pre = 15.0 #mass tolerance on precursor when searching
prefer_precursor_pred = 2 #prefer precursor mono mass predicted by
                        #instrument software.
                        # 0 = ignore previous predictions
                        # 1 = use only previous predictions
                        # 2 = supplement predictions with additional analysis
spectrum_processing = 0 #0=no, 1=yes
top_count = 300 #number of top scoring single peptides to combine
              #in relaxed analysis
truncate_prot_names = 0 #Max protein name character to export, 0=off
turbo_button = 1 #Generally speeds up analysis. Special cases cause reverse
                #effect, thus this is allowed to be disabled. 0=off

```

***Xtract processing parameters (typical)***

Resolution@400 = 50 000; S/N Threshold = 2; Fit Factor = 75%; Remainder = 25%; Averagine  
Table = Averagine; Max Charge = 6. Generate Masses Mode = [M+H]<sup>+</sup>.

### ***Algorithm for combining deconvoluted peak lists from PEAKS Studio and Xtract***

While PEAKS Studio was superior to Xtract to deconvolute peaks in the lower  $m/z$  segment Xtract was slightly better in for larger ions. Apart from that neither program produced a peak list incorporating all peaks produced by the other program, the calculated peak areas were different. The areas were not used for quantification but the actual numbers differed enough making it impossible to show them in the same graph, so a simple harmonization was required. This was done by choosing one common low mass and one common high mass peak from the output of the respective programs, calculating the Xtract-to-PEAKS Studio area ratios, calculating intercept and slope for a line containing the two ratios, and applying this mass dependent normalization factor to the PEAKS Studio area numbers. The two peak lists were then combined.

## Supplementary Figure Legends

### **Supplementary Fig. 1 Treatment of iNs with aqueous AD brain extracts induces neuritic dystrophy.**

(a) Schematic depicts the process used to generate mature iNs and the time interval for sample addition and live cell imaging. (b) On iN day 21, cells were treated with medium alone (control) or brain extracts (#1242-mock and #1242-ID) and cells imaged for 72 hours. Phase contrast images (top panel) were used to identify neurites (middle panel) using IncuCyte NeuroTrack software. Identified neurites (purple) are shown on the phase contrast images (bottom panel). Scale bars are 100  $\mu\text{m}$ . (c) Time-course plots show that A $\beta$ -containing aCSF extracts of brains #1242 (red filled circle) and #722 (blue filled circle) cause neuritotoxicity compared to the medium alone control (black) (comparison over last 6 hours of recording: #1242-mock vs. control,  $p < 0.001$ ; #722-mock vs. control,  $p < 0.001$ ; one-way ANOVA), or brain extracts immunodepleted (ID) of A $\beta$  with AW7; #1242-ID (red open circle) and #722-ID (blue open circle) (comparison over last 6 hours of recording: #1242-mock vs. ID,  $p < 0.001$ ; #722-mock vs. ID,  $p < 0.001$ ; one-way ANOVA). Each well of iNs was imaged for 6 h prior to addition of sample and NeuroTrack-identified neurite branch points used to normalize neurite branch points measured at each interval after addition of sample. Cells treated with medium alone were used to monitor the integrity of untreated cells.

### **Supplementary Fig. 2 Aqueous extract of mild AD brain contain ~4 and ~7 kDa A $\beta$ species,**

**which are immunologically indistinguishable from those from end-stage AD brain.** (a) aCSF extract of mild AD brain #1670 was IP'd with AW7-beads, antigen eluted with 500 mM ammonium hydroxide, the eluate lyophilized, the lyophilizate dissolved in formic acid and the

resulting solution subjected to SEC, and fractions used for WB with 2G3+21F12. **(b)** SEC-isolated ~4 and ~7 kDa fractions from mild AD brain #1670 and end-stage AD brain #722 were used for WB'ing employing 6 different anti-A $\beta$  mAbs. Synthetic A $\beta$ 1-40, A $\beta$ 1-42 and recombinant NTE-A $\beta$  (-31A $\beta$ 1-42) and A $\eta$ - $\alpha$  peptides were loaded as controls. Single arrow and double arrows indicate the ~4 and ~7 kDa A $\beta$  species, respectively, and an asterisk marks the position of A $\eta$ - $\alpha$ . The ~7 kDa A $\beta$  species from mild AD brain #1670 and end-stage AD brain #722 co-migrate and exhibit similar immunoreactivity anti-A $\beta$  mAbs.

**Supplementary Fig. 3 The ~7 kDa A $\beta$  species are not induced during the purification processes.** **(a)** aCSF-B buffer without (upper panel) or with (lower panel) 100 ng/mL synthetic A $\beta$ 1-42 was IP'd with AW7-beads, antigen eluted with 500 mM ammonium hydroxide, the eluate lyophilized, the lyophilizate dissolved in formic acid and the resulting solution subjected to SEC, and fractions used for WB with 4G8. **(b)** aCSF-B extract of control brain #1821 without (upper panel) or with (lower panel) 100 ng/mL synthetic A $\beta$ 1-42 was IP'd with AW7-beads, antigen eluted with 500 mM ammonium hydroxide, the eluate lyophilized, the lyophilizate dissolved in formic acid and the resulting solution subjected to SEC, and fractions used for WB with 4G8. No signal was detected in fractions 8-10, where the ~7 kDa A $\beta$  species elute.

**Supplementary Fig. 4 Both aqueous ~7 kDa A $\beta$  and plaque-derived ~7 kDa A $\beta$  are neuritotoxic.** The effect of ~7 kDa A $\beta$  from brain #1242 on neuritic branch points was quantified using the same neurons shown in Figure 1e and Figure 2e. **(a)** Time-course lots show that the aqueous ~7 kDa A $\beta$ , but not A $\beta$  monomer, caused time-dependent neuritotoxicity

(comparison over last 6 hours of recording: ~7 kDa A $\beta$  vs. control,  $p < 0.01$ ; ~4 kDa A $\beta$  vs. control,  $p > 0.05$ ; one-way ANOVA). **(b)** Branch points of the A $\beta$  monomer and ~7 kDa A $\beta$  treated iNs as shown in Figure 2e. Time-course lots show that the ~7 kDa A $\beta$  from AD amyloid plaques, but not A $\beta$  monomer, caused time-dependent neuritotoxicity (comparison over last 6 hours of recording: ~7 kDa A $\beta$  vs. control,  $p < 0.001$ ; ~4 kDa A $\beta$  vs. control,  $p > 0.05$ ; one-way ANOVA).

**Supplementary Fig. 5 AW7 immunodepletion removes neuritotoxicity induced by the ~7 kDa A $\beta$  fractions.** **(a)** aCSF extract of AD brain #414 was IP'd with AW7-beads, antigen eluted with 500 mM ammonium hydroxide, the eluate lyophilized, the lyophilizate dissolved in formic acid and the resulting solution subjected to SEC, and fractions used for WB with 4G8. **(b)** The A $\beta$  monomer and ~7 kDa A $\beta$  fractions shown in **a** were exchanged into iN culture medium, immunodepleted with pre-immune serum or AW7, and then added to iN cells. The ~7 kDa A $\beta$ , but not A $\beta$  monomer, caused time-dependent neuritotoxicity. AW7 immunodepletion removes the neuritotoxicity of the ~7 kDa A $\beta$ .

**Supplementary Fig. 6 LC-MS identifies a rich array of monomer primary structures in aqueous brain extract.** **(a)** aCSF extract of brain #1185 was IP'd with AW7-beads and used for SEC as described in the Methods, and fractions analyzed by WB with 2G3 and 21F12. The fractions which contained ~7 kDa A $\beta$  and monomers were used for the mass spectrometric analysis shown in Fig. 1f and g. **(b)** Spectra are shown for 4 chromatograph retention time spans for the SEC-isolated monomer fraction of brain #1185 aCSF extract. The x-axis indicates  $m/z$  values

between 850 and 1350, the y-axis signal intensity, and the z-axis the HPLC retention time span. The identities of the peaks shown were confirmed by MS/MS.

**Supplementary Fig. 7 Plaque-derived ~7 kDa A $\beta$  species from AD brain #722 is neuritotoxic.**

(a) Amyloid plaques isolated from AD brains #722 were dissolved in formic acid, chromatographed on SEC and analyzed by WB with 2G3 and 21F12. (b and c) Equal amount of the A $\beta$  monomer and ~7 kDa A $\beta$  fractions shown in a were applied to iNs. Time-course plots of relative neurite length (b) and branch points (c) show that plaque-derived ~7 kDa A $\beta$  species (red) cause neuritotoxicity, whereas plaque-derived A $\beta$  monomer (blue) does not (comparison over last 6 hours of recording: ~7 kDa A $\beta$  vs. control,  $p < 0.001$ ; ~4 kDa A $\beta$  vs. control,  $p > 0.05$ ; one-way ANOVA). The medium vehicle control is shown in black.

**Supplementary Fig. 8 The ~7 kDa A $\beta$  species isolated from plaques co-migrate with the ~7**

**kDa A $\beta$  in aCSF brain extracts.** (a) A total of 8 mAbs were used to investigate the primary structure of plaque-derived and aCSF extracted A $\beta$ . (b) Plaque SEC-isolated ~4 and ~7 kDa fractions, and AW7 IPs of aCSF extracts were used for WB'ing employing 6 different anti-A $\beta$  mAbs, and (c) 2 mAbs with epitopes in APP N-terminal of A $\beta$ . The ~7 kDa A $\beta$  species from aCSF extracts and solubilized plaques co-migrate and react similarly with anti-A $\beta$  mAbs, but are not recognized by the anti-APP mAbs 2E9 or 28D10. (c) Re-probing the 28D10 blot with 4G8 reveals ~4 and ~7 kDa A $\beta$  species are present. Synthetic A $\beta$ 1-40, A $\beta$ 1-42, recombinant NTE-A $\beta$  (-31A $\beta$ 1-42) and recombinant A $\eta$ - $\alpha$  were loaded as controls. A single arrow indicates A $\beta$  monomer, double arrows ~7 kDa A $\beta$ , and an asterisk denotes A $\eta$ - $\alpha$ .

**Supplementary Fig. 9 Western blot analysis of plaques isolated from brain #1444.** Amyloid plaques from AD brain #1444 were dissolved in formic acid, chromatographed on SEC and analyzed by WB with 2G3 and 21F12. The elution of Blue dextran (BD) and globular protein standards is indicated by downward point arrows and SDS-PAGE molecular weight standards are on the left. Single arrow and double arrows indicate the ~4 and ~7 kDa A $\beta$ , respectively. Synthetic A $\beta$ 1-42 loading controls are in the last 3 lanes. Fractions (8-10) containing ~4 kDa and fractions (13-15) containing ~7 kDa A $\beta$  were pooled and used for LTP experiments shown in Fig. 2f and g.

**Supplementary Fig. 10 LC-MS identifies a rich array of plaque-derived monomer primary structures both within and between brains.** Spectra are shown for 4 chromatograph retention time spans for plaque-derived SEC-isolated monomer fractions of brains #1185, #1444, #722, #1167, #1242, and #464. The x-axis indicates  $m/z$  values between 850 and 1350, the y-axis signal intensity, and the z-axis the HPLC retention time span. The identities of the peaks shown were confirmed by MS/MS (see Supplementary Table 1). Approximately 10% of the respective SEC-isolated fractions was used for LC-MS and -MS/MS analysis.

**Supplementary Fig. 11 Deconvoluted fragment ion spectrum of the plaque-derived intact dimer A $\beta$ 1-40 $\times$ 1-40 from brain 1242.** The schematic shows an A $\beta$ 1-40 homo-dimer cross-linked between D1 and E22. The  $\alpha$ -chain is shown in green and the  $\beta$ -chain in orange, and

fragmentation sites corresponding to detected fragments are indicated. Deconvoluted peak centroids for plaque-derived intact ~7 kDa A $\beta$  from brain #1242 are shown in 3 separate panels, [M+H]<sup>+</sup>: 0-2,500 (upper panel), 2,500-6,500 (middle panel), and 6,500-8,700 (lower panel). Peak centroids are below the labels with a help line above as guide for the amino acid ladders indicated. Peaks from three different fragment ion series are indicated together with the respective sequence ladders;  $\alpha$ -chain b-ions (green),  $\beta$ -chain  $\gamma$ -ions (italic orange), and  $\alpha(1-40)\times\beta(1-40)$ -chain b-ions (blue). Unassigned peaks are in light grey. Only one ladder is observed, indicating that for an individual dimer ion only one of the chains is subject to fragmentation (cf. Supplementary Fig. 14). However, peaks corresponding to cleavages between E22 and D1 must originate from the  $\beta$ -chain. Approximately 10% of the SEC-isolated fraction was used for this LC-MS/MS analysis. Supplementary Table 3 contains the data presented in this figure.

**Supplementary Fig. 12 Deconvoluted fragment ion spectrum of the intact A $\beta$ 1-40 $\times$ 1-38 and A $\beta$ 1-38 $\times$ 1-40 heterodimer from brain 1242.** The schematic shows two possible A $\beta$ 1-40 $\times$ A $\beta$ 1-38 hetero-dimers cross-linked between D1 and E22. The  $\alpha$ -chain is shown in green for 1-40 on the left panel, and 1-38 on the right panel. The  $\beta$ -chain is in blue for 1-38 on the right panel, and in orange for 1-40 of the left panel. Fragmentation sites corresponding to detected fragments are indicated. Deconvoluted peak centroids for plaque-derived intact ~7 kDa A $\beta$  from brain #1242 is shown in 3 panels with [M+H]<sup>+</sup> ranging from: 0-2,500 (upper panel), 2,500-6,500 (middle panel), and 6,500-8,500 (lower panel). Peak centroids are below the labels with a help line above as guide for the amino acid ladders indicated. Peaks from five different fragment ion



series are indicated with the respective sequence ladders;  $\alpha$ -chain b-ions (green),  $\beta(1-38)$ -chain y-ions (italic blue),  $\beta(1-40)$ -chain y-ions (italic orange),  $\alpha(1-40)\times\beta(1-38)$ -chain b-ions (blue), and  $\alpha(1-38)\times\beta(1-40)$ -chain b-ions (orange). Unassigned peaks are in light grey. Two ladders are observed (one for each dimer type) indicating that only one chain (presumably the  $\beta$ -chain) from each dimer type is subject to fragmentation. Approximately 10% of the SEC-isolated fraction was used for this LC-MS/MS analysis. Supplementary Table 3 contains the data presented in this figure.

**Supplementary Fig. 13 Deconvoluted fragment ion spectrum of the plaque-derived intact dimer A $\beta$ 1-42 $\times$ 1-42 from brain #1185.** The upper left panel shows the ion chromatogram for  $m/z$  1502.76. The average mass spectrum of the indicated retention time window and the fragment mass spectrum was generated by averaging all MS/MS acquisitions for  $m/z$  1502.76 within the time window. Expansions around  $m/z$  1502.76 are shown together with the theoretical isotope distributions for A $\beta$ 1-42 homo-dimer 6+ ions having links with either NH<sub>3</sub> or H<sub>2</sub>O net loss. The schematic at the upper right shows an A $\beta$ 1-42 homo-dimer. The  $\alpha$ -chain is shown in green and the  $\beta$ -chain in orange, and all fragmentation sites corresponding to detected fragments are indicated. The deconvoluted peak centroids of the fragment mass spectrum for plaque-derived intact  $\sim$ 7 kDa A $\beta$  from brain #1185 are shown in 3 separate panels, [M+H]<sup>+</sup>: 0-2,500 (upper panel), 2,500-6,500 (middle panel), and 6,500-9,100 (lower panel). Peak centroids are below the labels with a help line above as guide for the amino acid ladders indicated. Peaks from three different fragment ion series are indicated together with the respective sequence ladders;  $\alpha$ -chain b-ions (green),  $\beta$ -chain y-ions (italic orange), and  $\alpha(1-$

42) $\times$  $\beta$ (1-42)-chain b-ions (blue). Unassigned peaks are shown in light grey. Only one ladder is observed, indicating that for an individual dimer ion only one of the chains is subject to fragmentation (cf. Supplementary Fig. 14). Approximately 50% of the SEC-isolated fraction was used for this LC-MS/MS analysis. Supplementary Table 3 contains the data presented in this figure, with mass deviations for both types of links ( $\text{NH}_3$  or  $\text{H}_2\text{O}$  net loss).

**Supplementary Fig. 14 Deconvoluted fragment ion spectrum of dityrosine dimer.** Dimers were formed by enzymatic oxidation of recombinant  $\text{A}\beta$ (1-42) to generate 1-42 homodimers linked between Y10 of one monomer chain and the Y10 of the opposing monomer and an expected monoisotopic  $[\text{M}+\text{H}]^+$  of 9,021.53 Da. The deconvoluted peak centroids of the spectrum spanning the  $[\text{M}+\text{H}]^+$  from 7,100 to 9,100 are shown. Fragment ions corresponding to simultaneous fragmentation of both the  $\alpha$ - and  $\beta$ -chains is evident, but since the  $\alpha$ - and  $\beta$ -chains are equivalent, annotations only refer to dimers for which the  $\alpha$ -chains are longer. Fifteen pmol Y10-linked  $\text{A}\beta$ 1-42 $\times$ 1-42 was used for this LC-MS/MS analysis. Supplementary Table 3 contains the data presented in this figure.

**Supplementary Fig. 15 Detailed fragment ion spectrum of the tryptic peptide  $\text{A}\beta$ 17-28 $\times$ 1-5 from the ~7 kDa plaque-derived fraction of brain #1242.** (a) Deconvoluted fragment ion spectrum from tandem MS/MS of the tryptic peptide  $\text{A}\beta$ 17-28 $\times$ 1-5 with all identified peaks indicated both with sequence and using the nomenclature based on Ref. ([Schilling \*et al.\*, 2003](#)) extended with internal fragments. Peaks corresponding to identified  $\text{A}\beta$  sequence are colored

and unassigned peaks are in light grey. **(b)** Schematic of the tryptic peptides released from a putative A $\beta$ 1-40-A $\beta$ 1-40 dimer cross-linked at D1 and E22, and A $\beta$ 17-28 $\times$ 1-5 related fragments detected in the ~7 kDa plaque-derived fraction isolated from brain #1242. A $\beta$  heterodimers are covalently cross-linked and the most abundant species is linked at E22 and D1. Supplementary Table 4 contains the data presented in this figure.

**Supplementary Fig. 16 Full length version of the blots shown in Fig. 1 and 2.**

## References

Schilling B, Row RH, Gibson BW, Guo X, Young MM. MS2Assign, automated assignment and nomenclature of tandem mass spectra of chemically crosslinked peptides. *Journal of the American Society for Mass Spectrometry* 2003; 14(8): 834-50.

# Supplementary Fig. 1

**a**

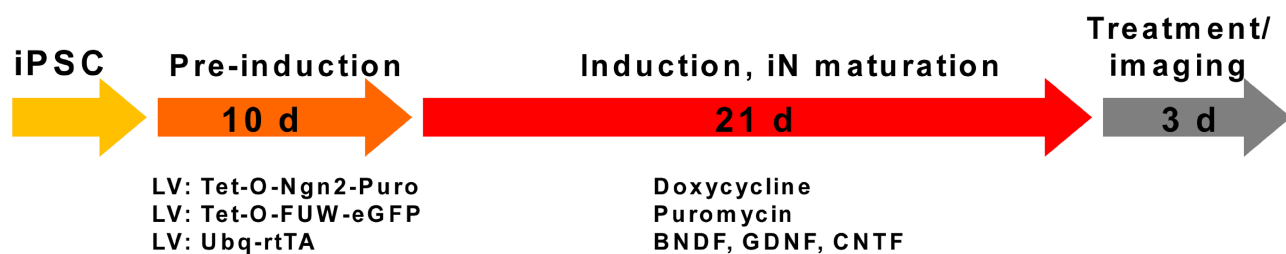

**b**

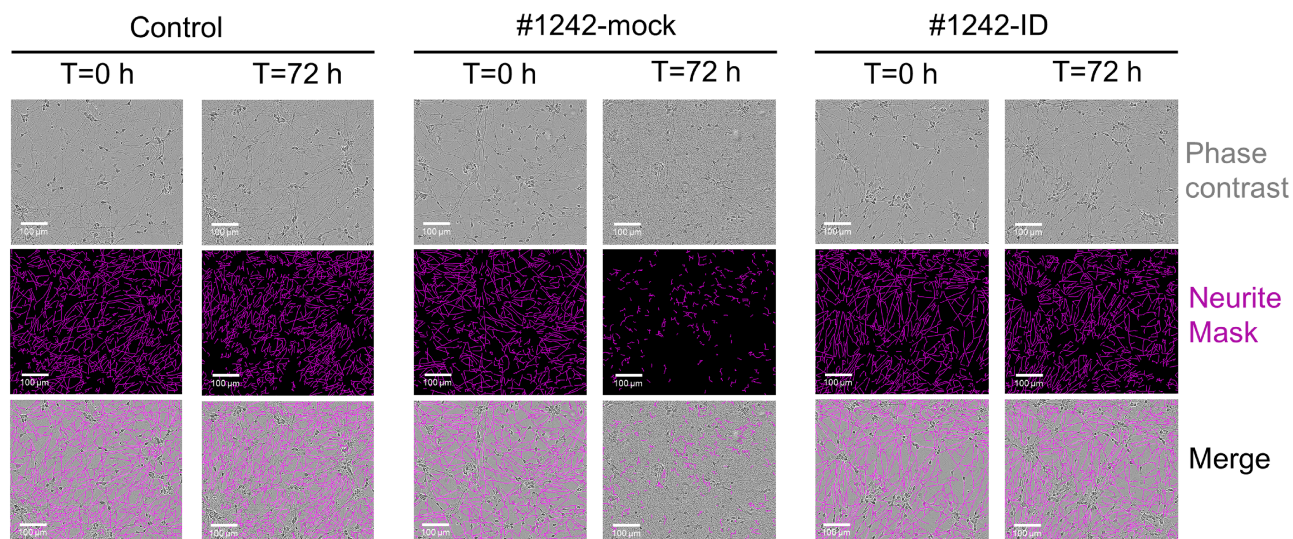

**c**

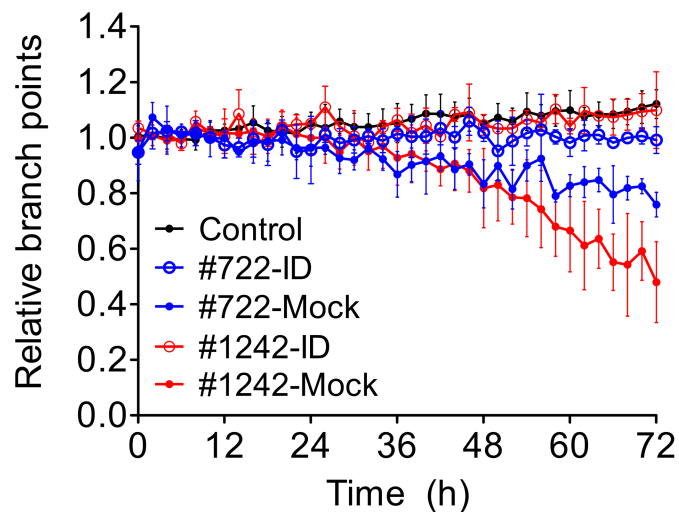

# Supplementary Fig. 2

**a**

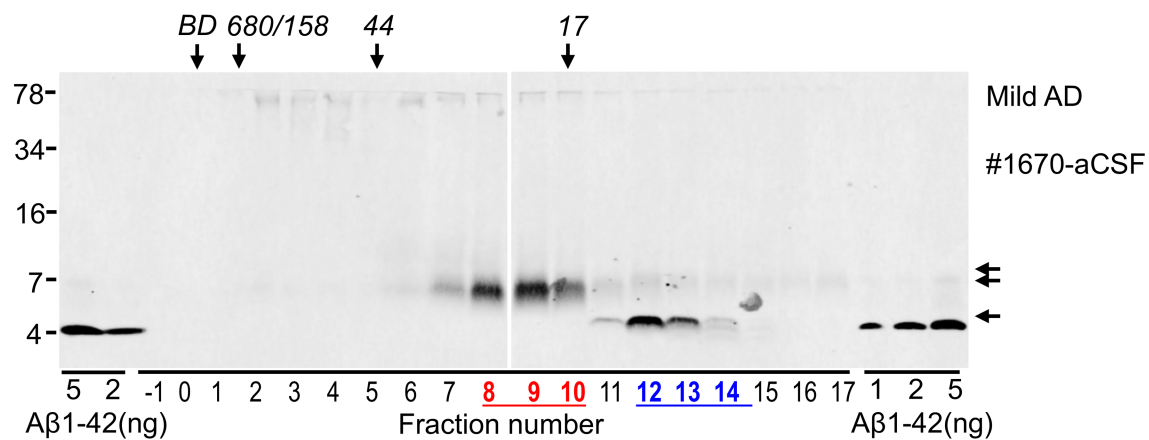

**b**

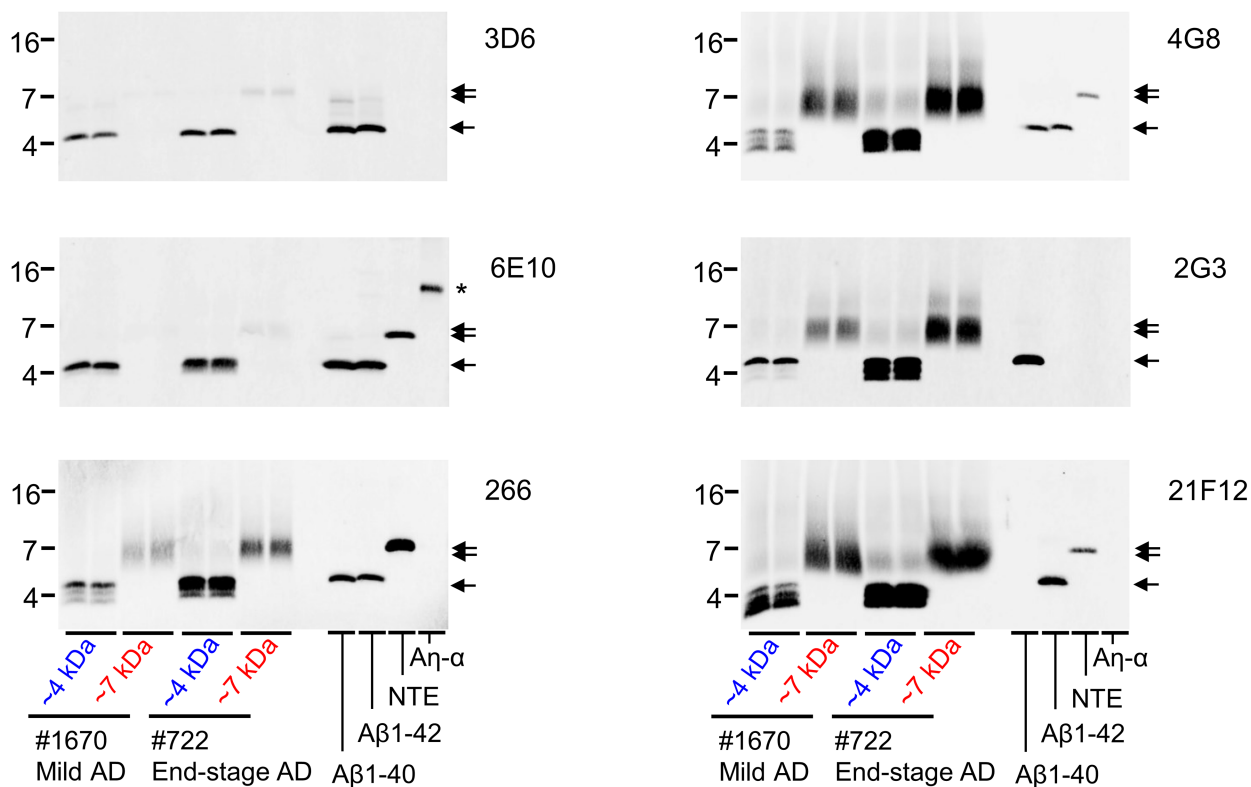

# Supplementary Fig. 3

**a**

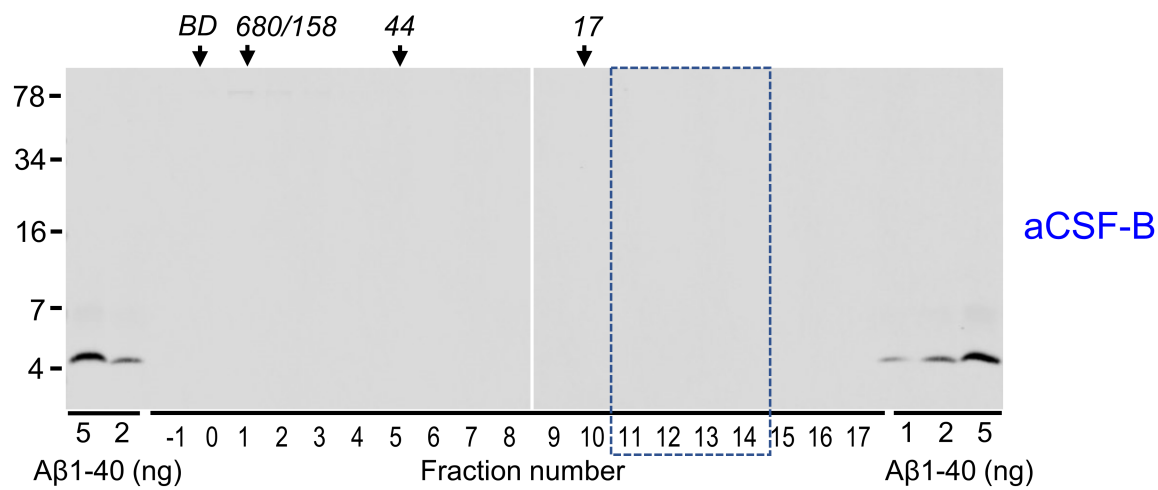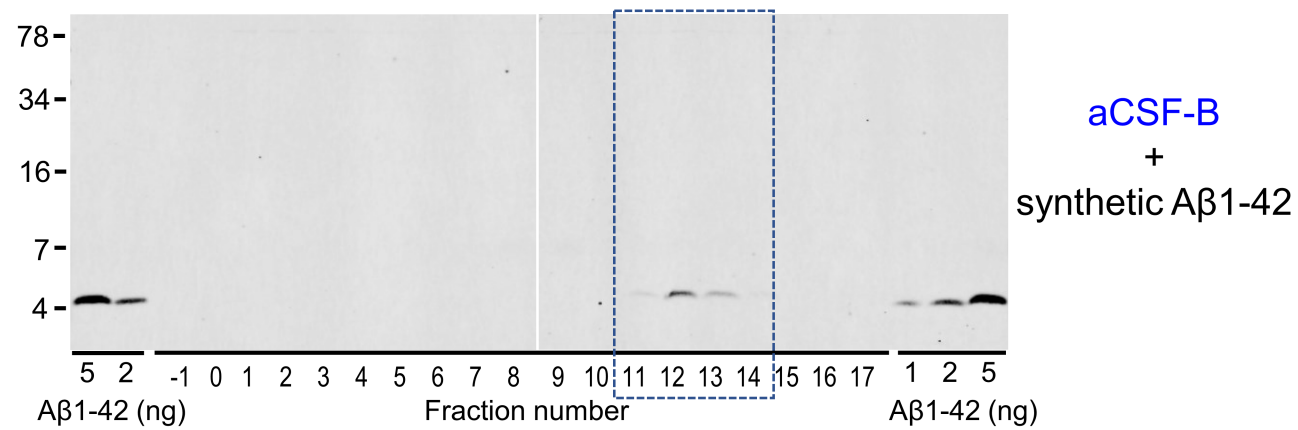

**b**

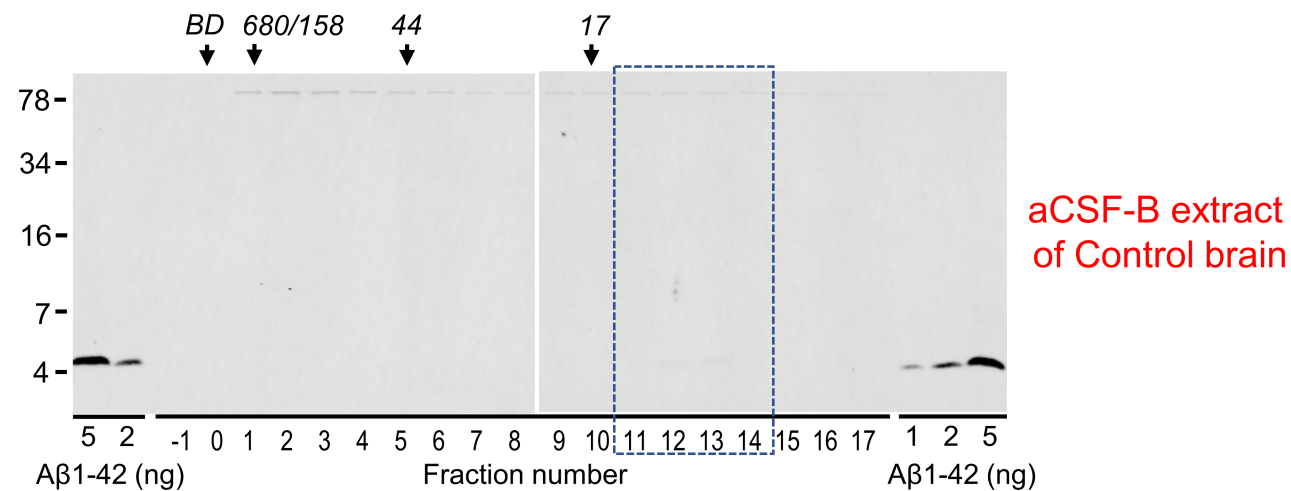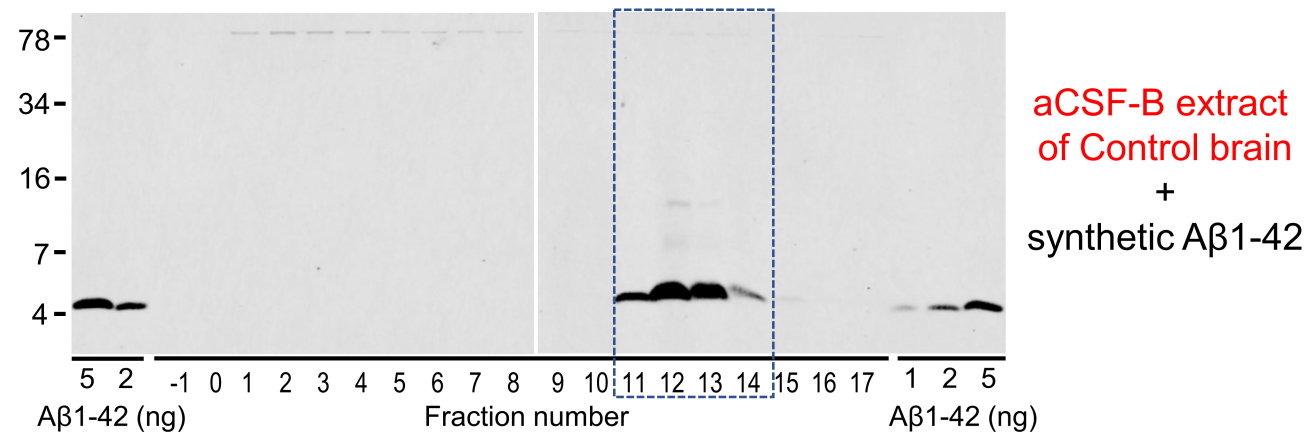

# Supplementary Fig. 4

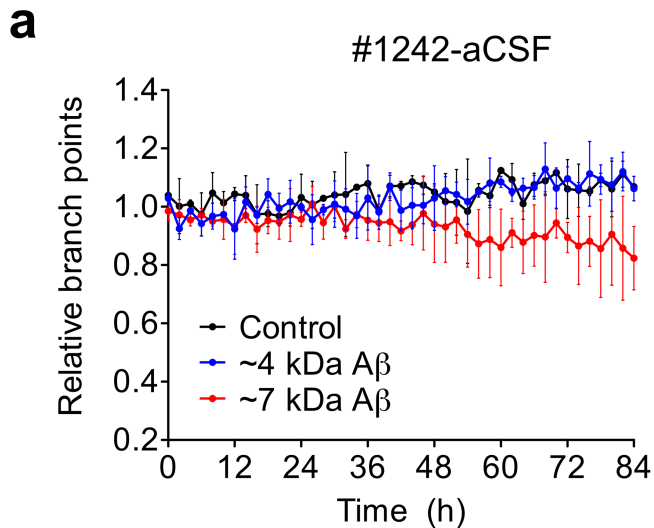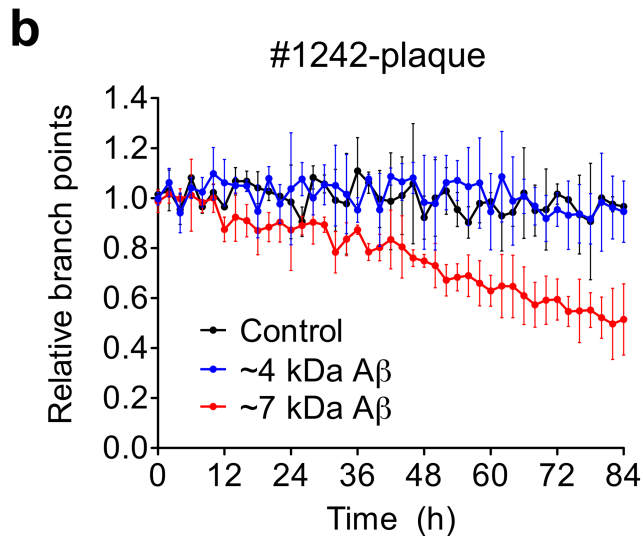



# Supplementary Fig. 5

**a**

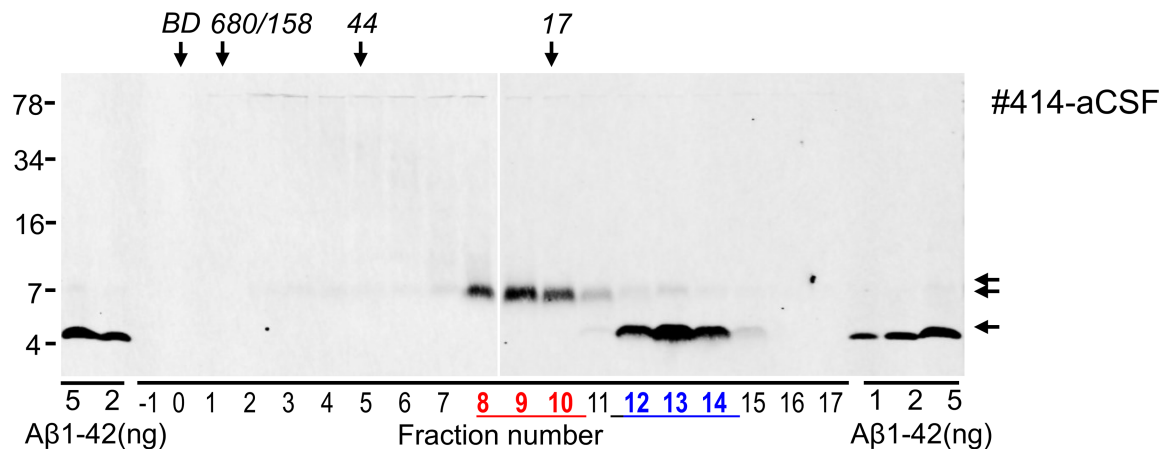

**b**

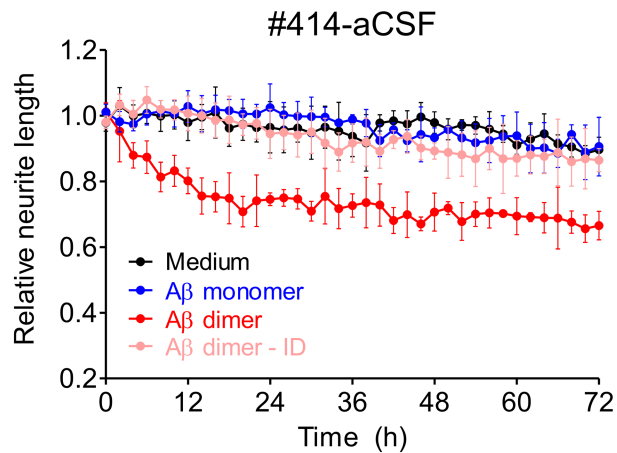

**c**

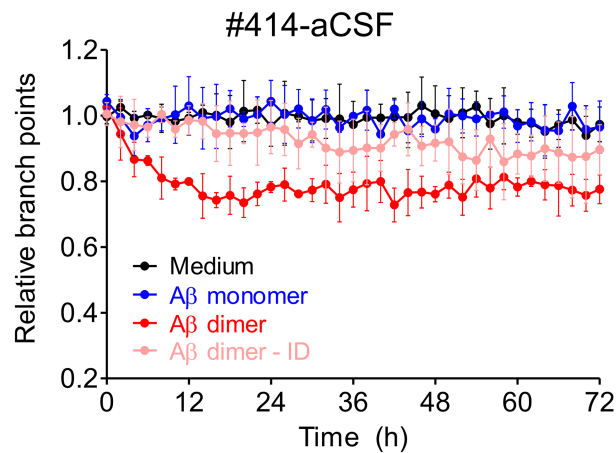

# Supplementary Fig. 6

**a**

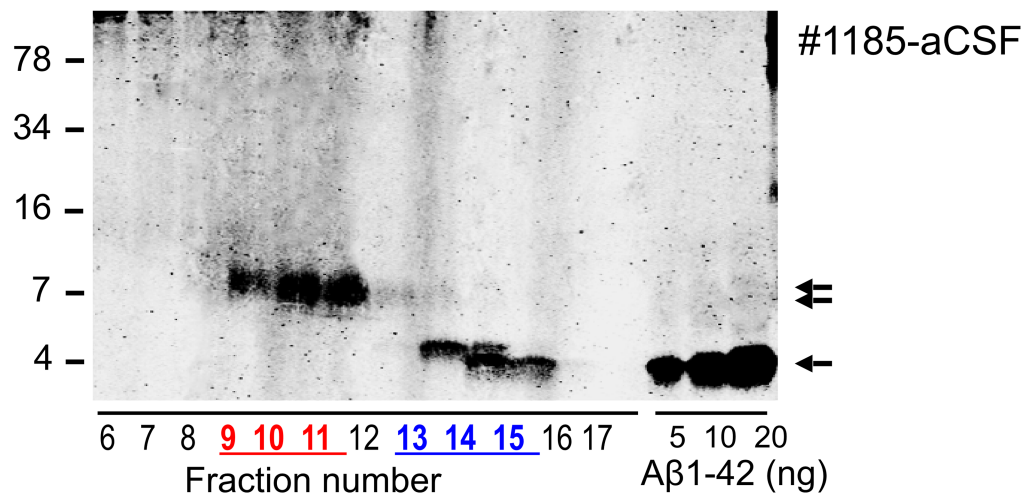

**b**

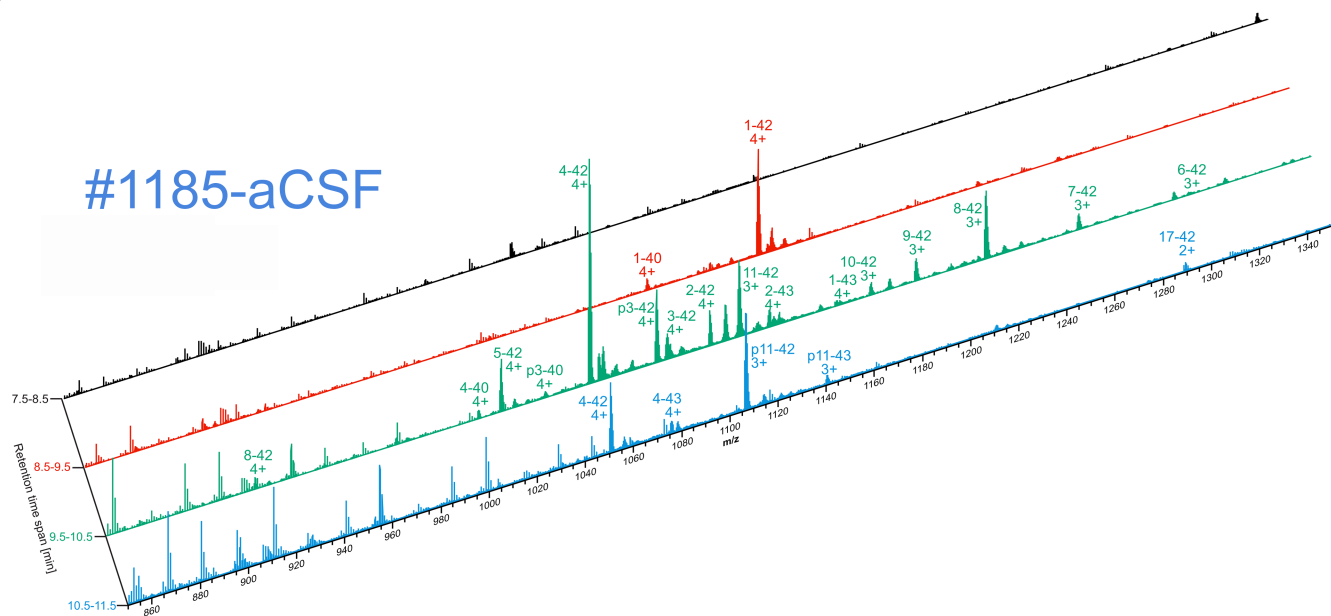

# Supplementary Fig. 7

**a**

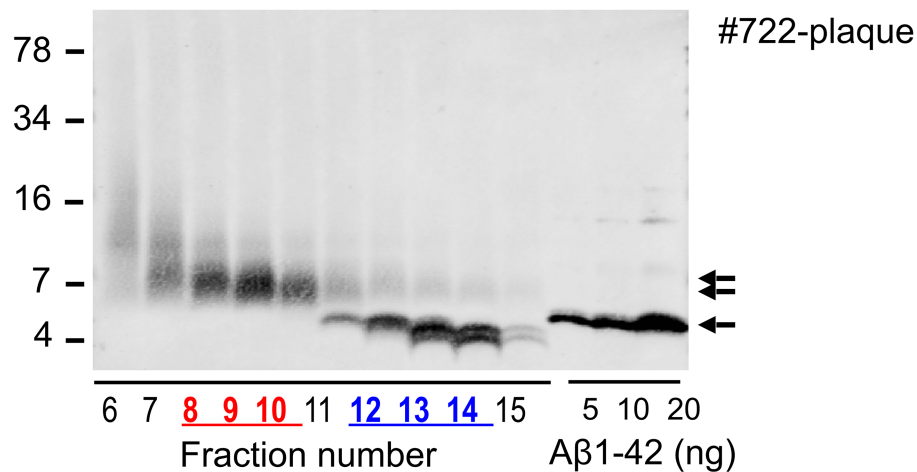

**b**

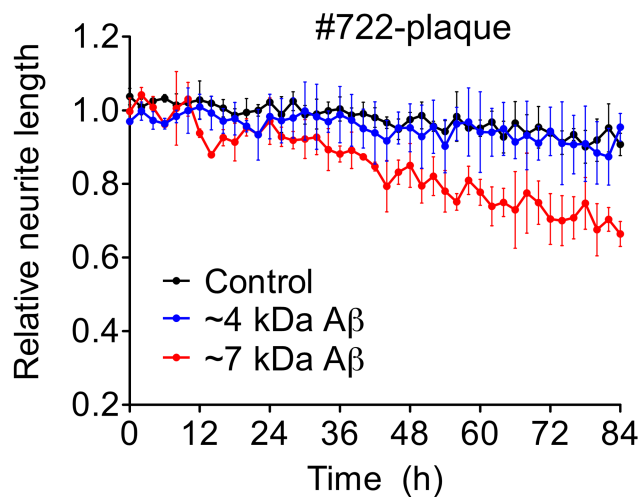

**c**

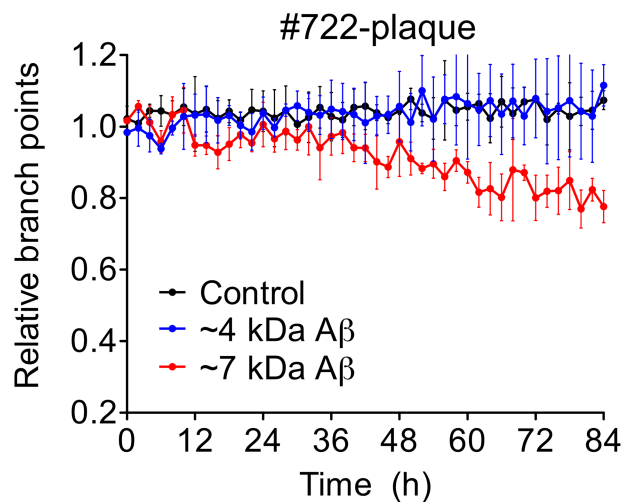

# Supplementary Fig. 8

**a**

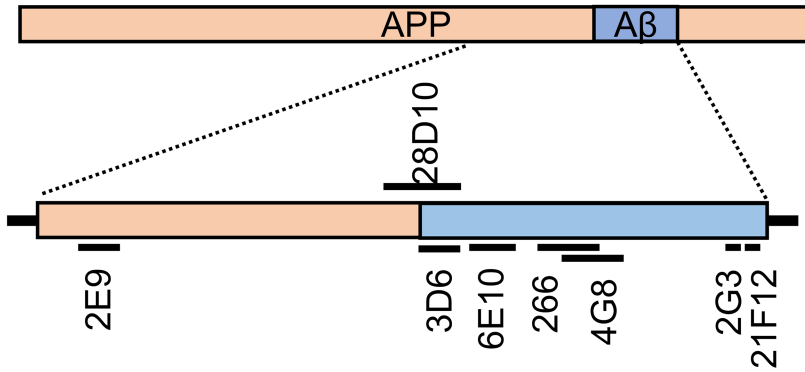

**b**

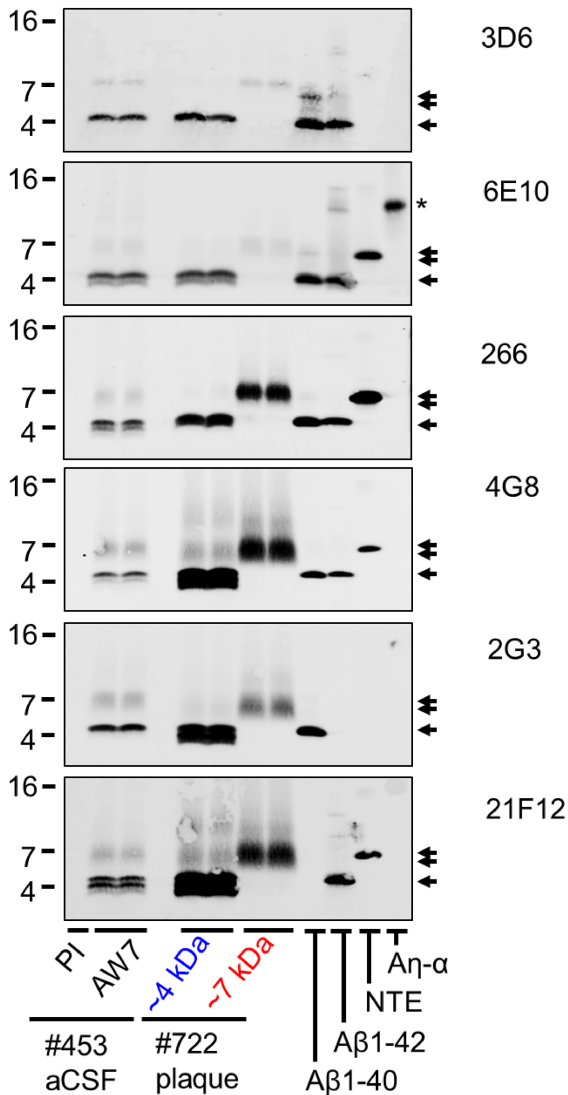

**c**

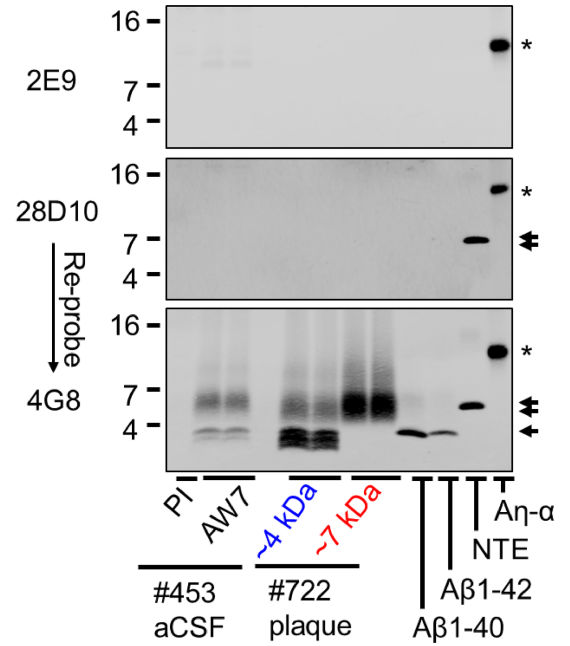

# Supplementary Fig. 9

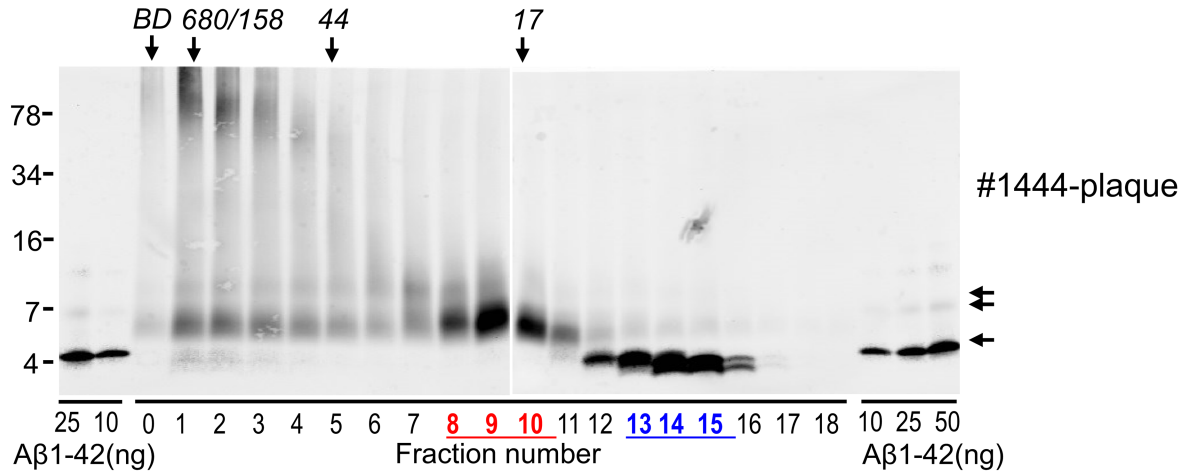

# Supplementary Fig. 10

#1185-plaque

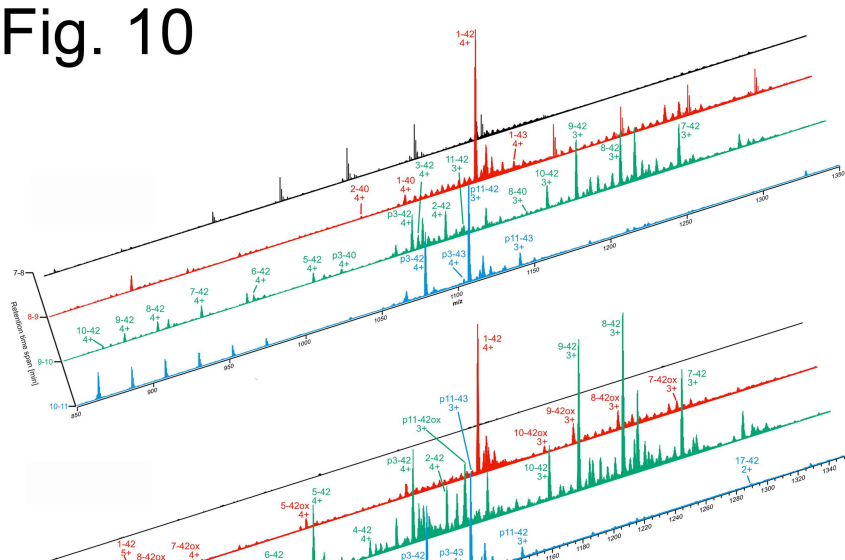

#1444-plaque

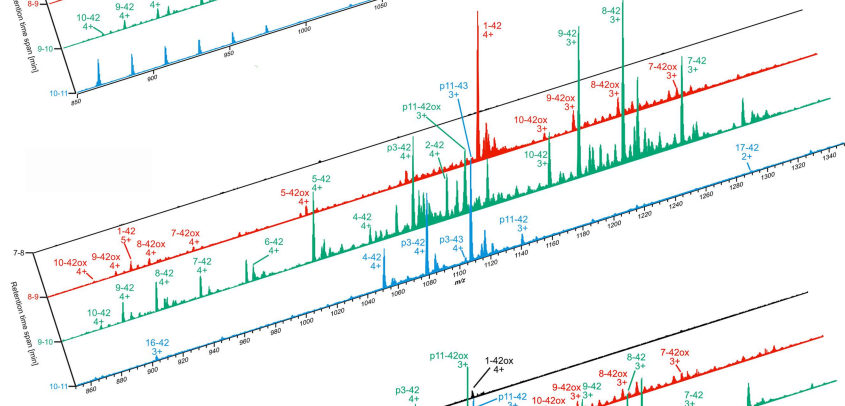

#722-plaque

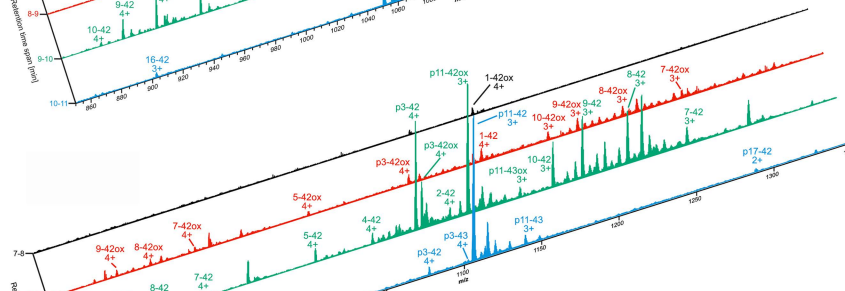

#1167-plaque

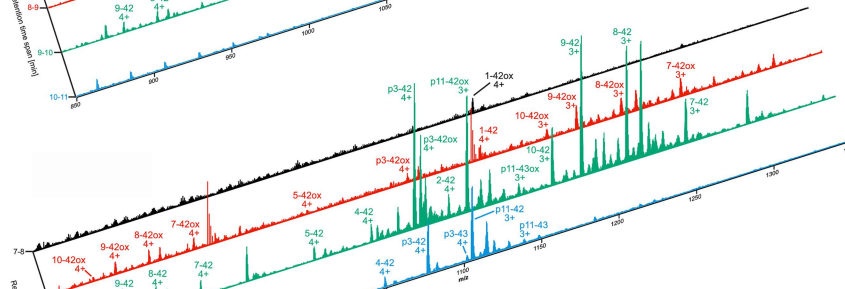

#1242-plaque

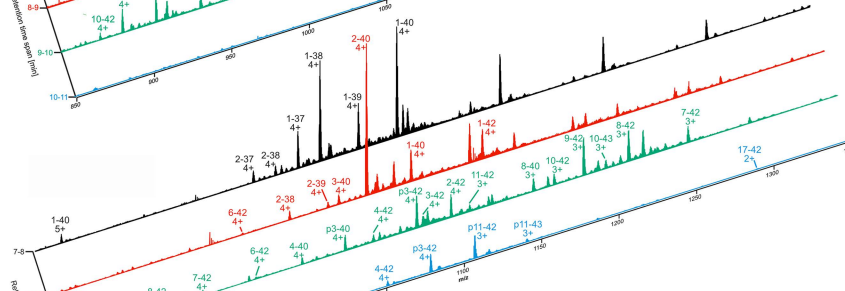

#464-plaque

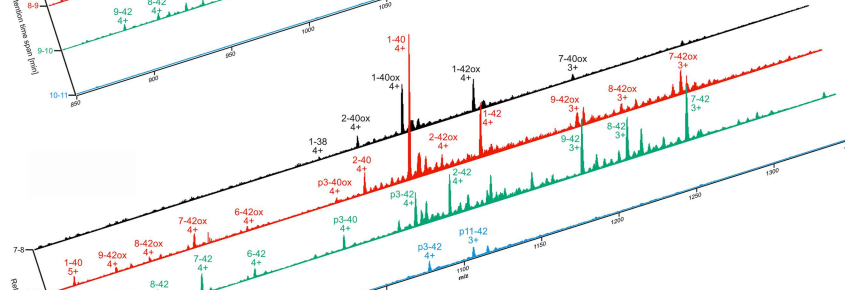

# Supplementary Fig. 11

## A $\beta$ 1-40x1-40

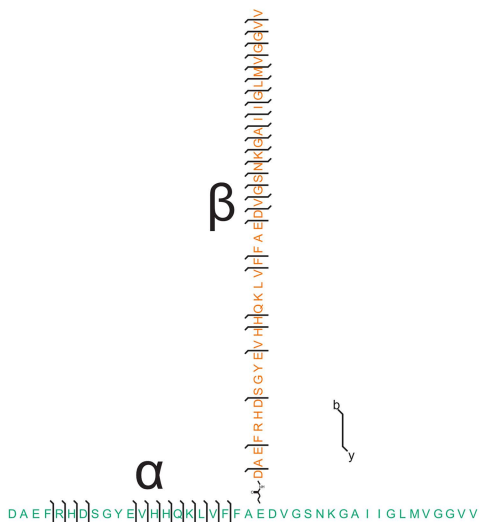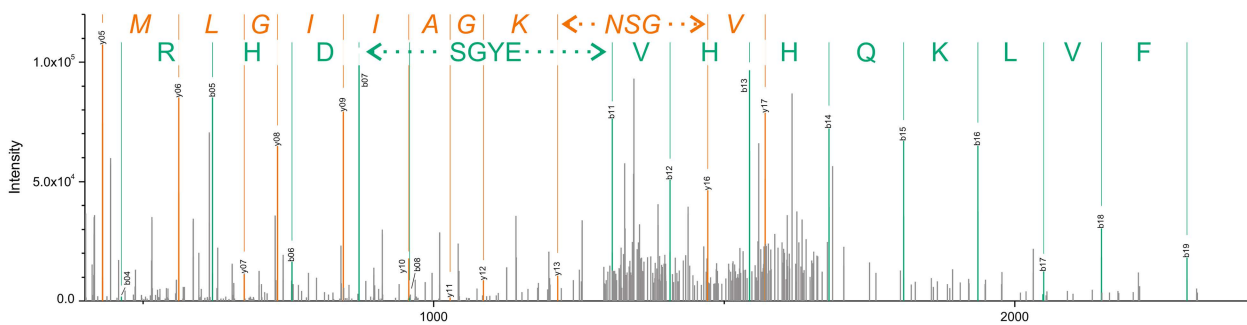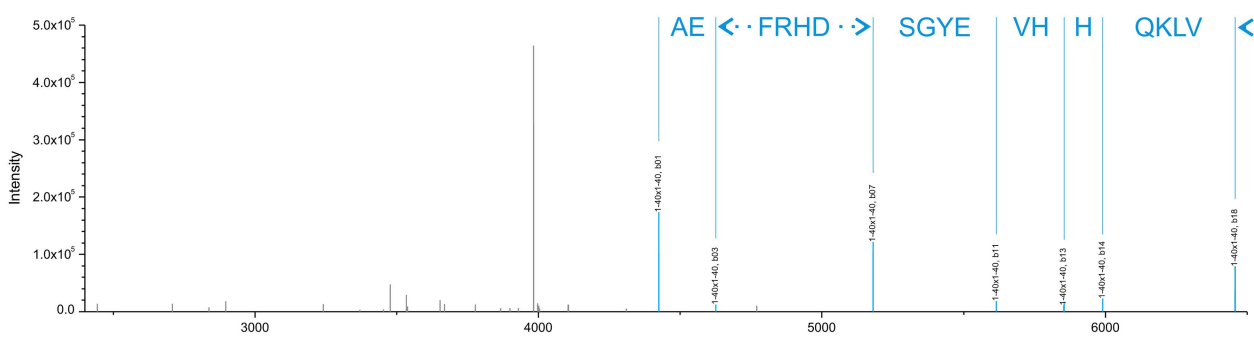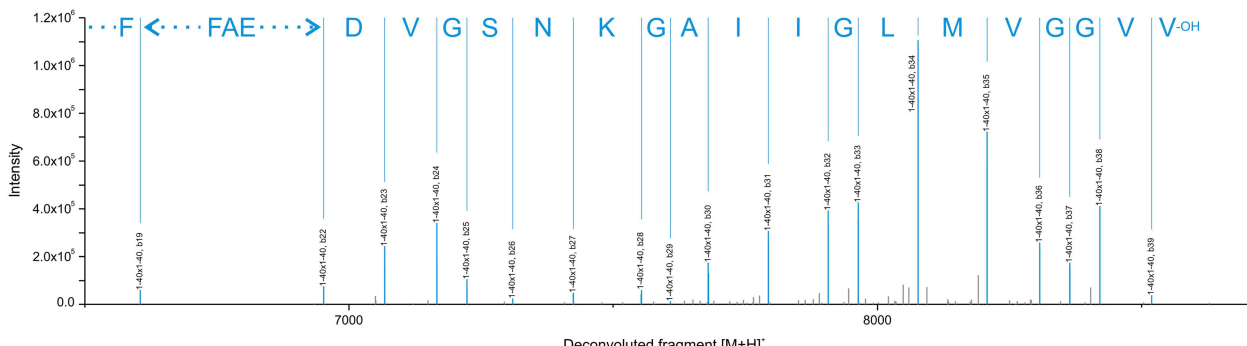

Deconvoluted fragment [M+H]<sup>+</sup>

# Supplementary Fig. 12

## A $\beta$ 1-40x1-38

## A $\beta$ 1-38x1-40

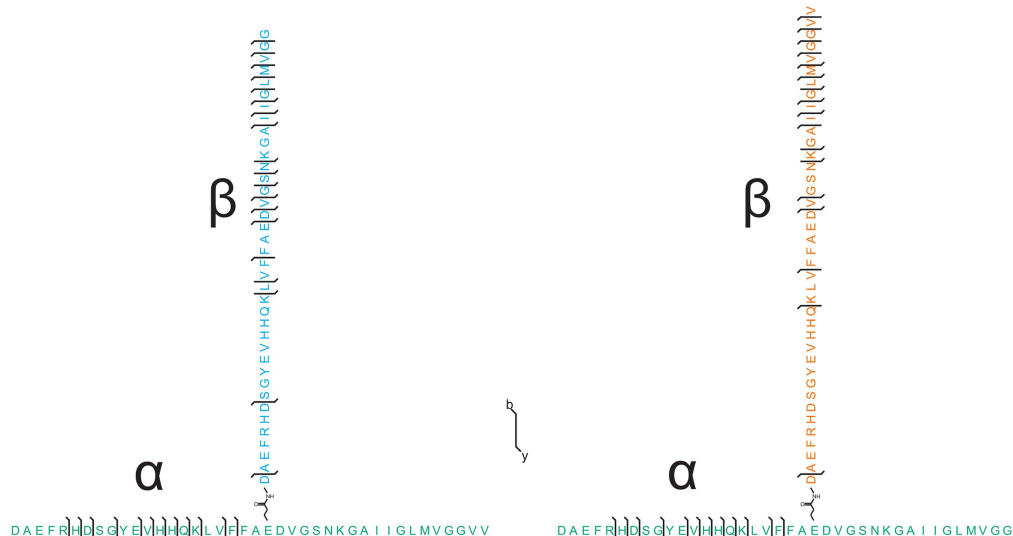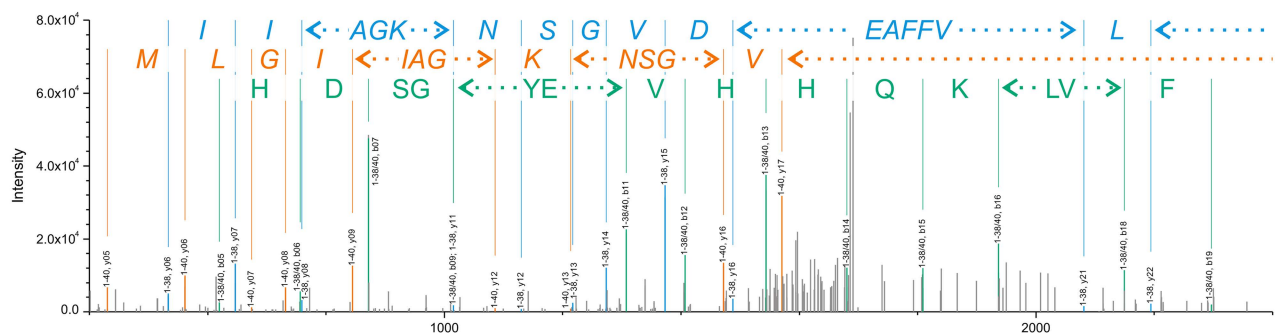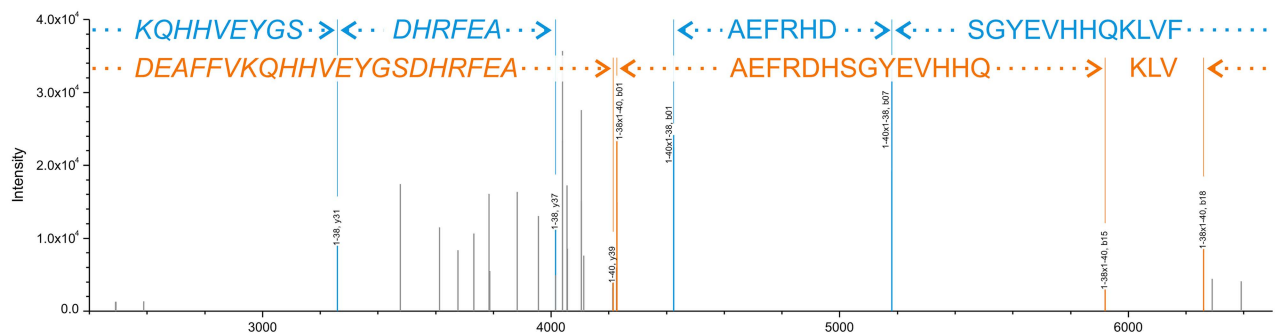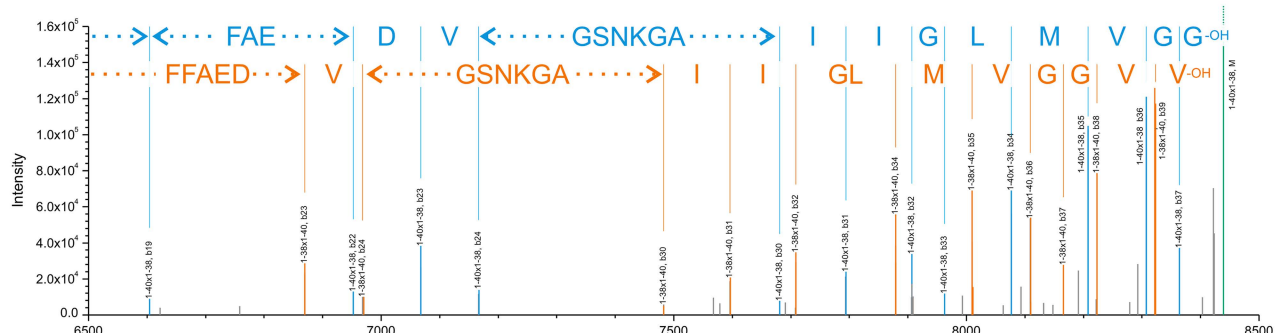

Deconvoluted fragment [M+H]<sup>+</sup>



# Supplementary Fig. 13

## A $\beta$ 1-42x1-42

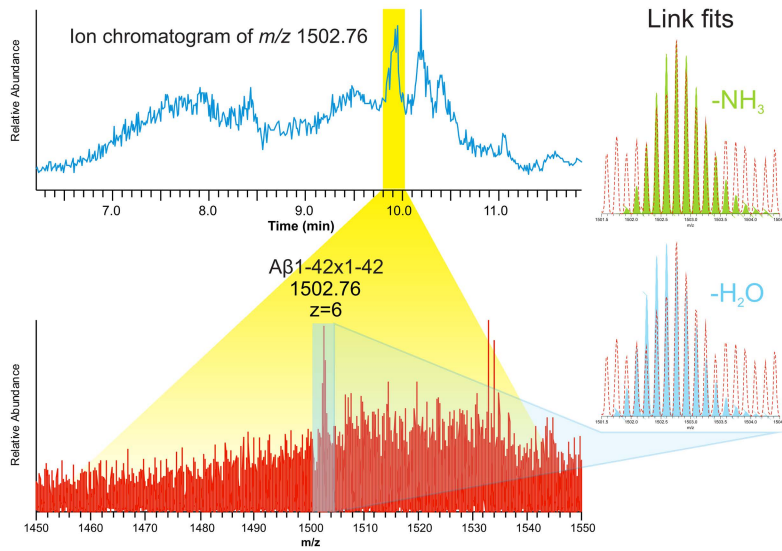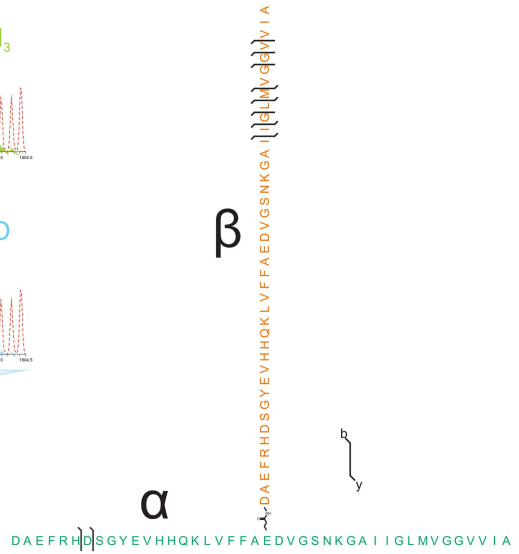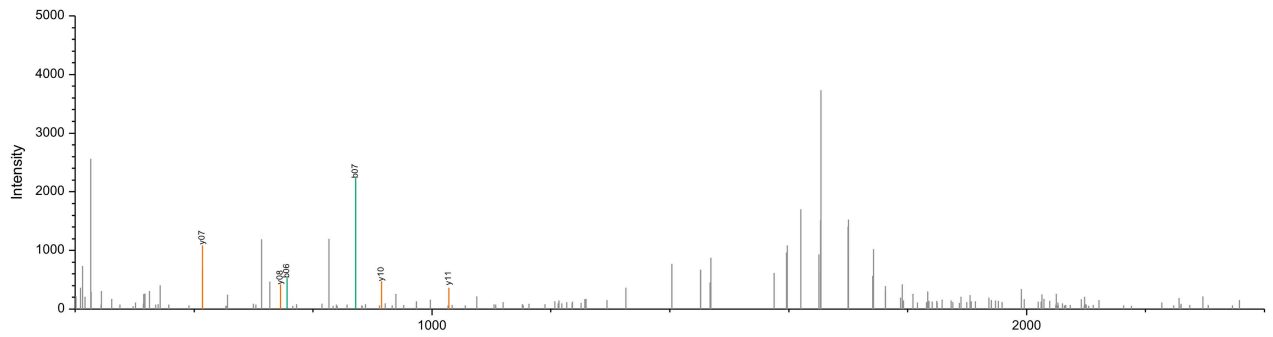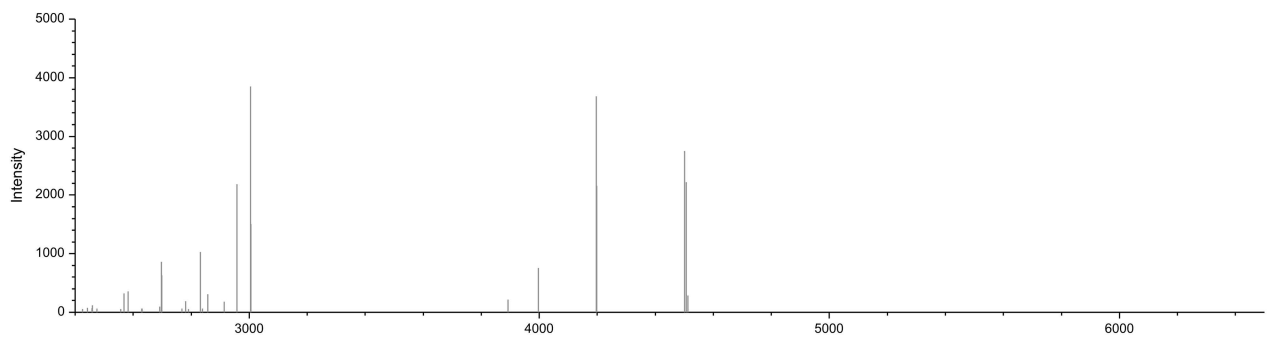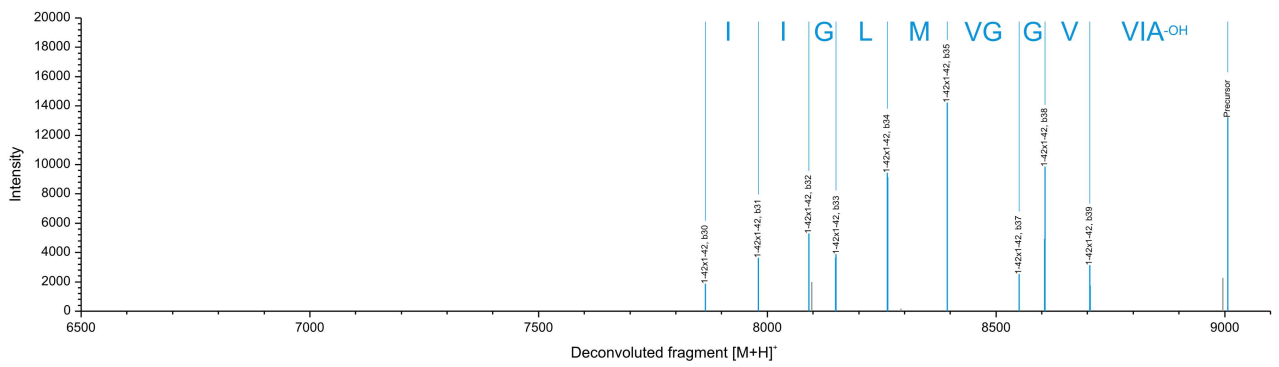

# Supplementary Fig. 14

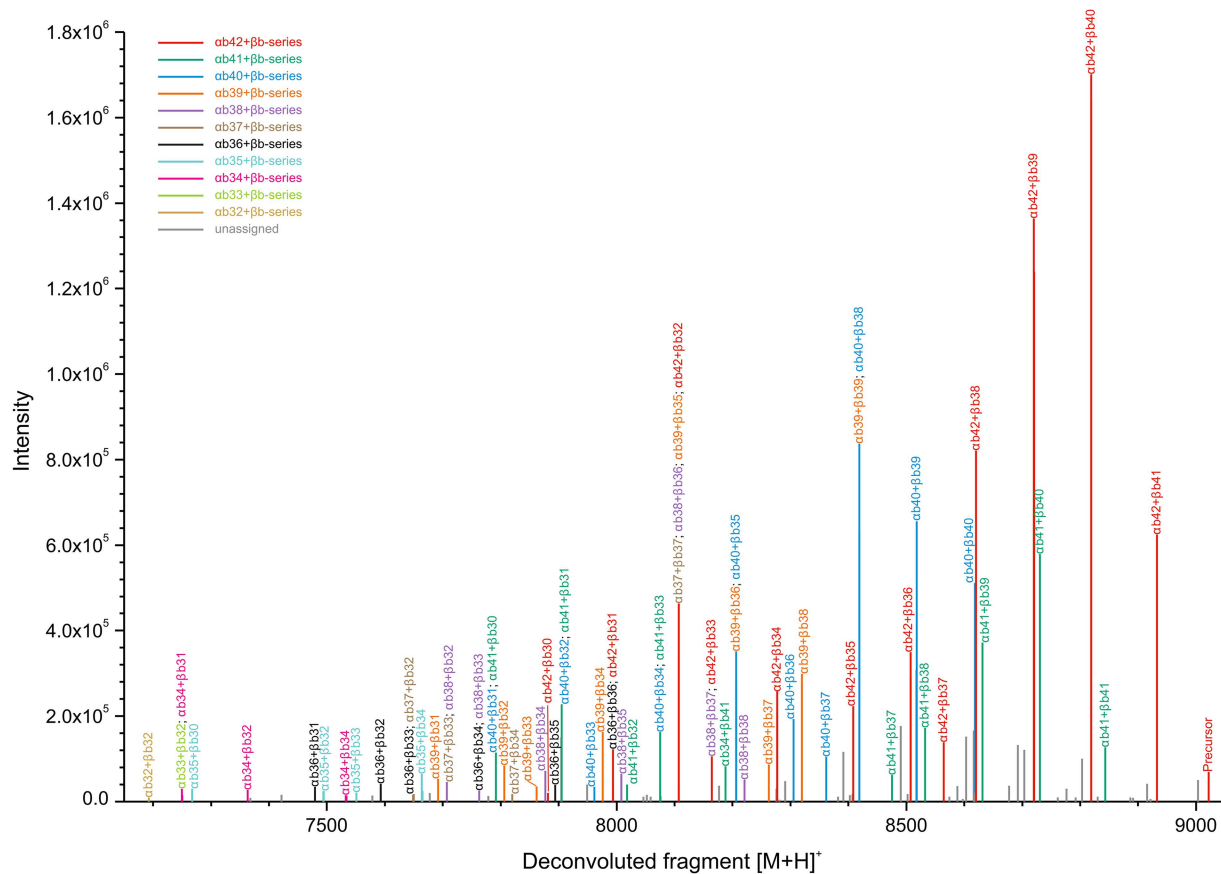

# Supplementary Fig. 15

**a**

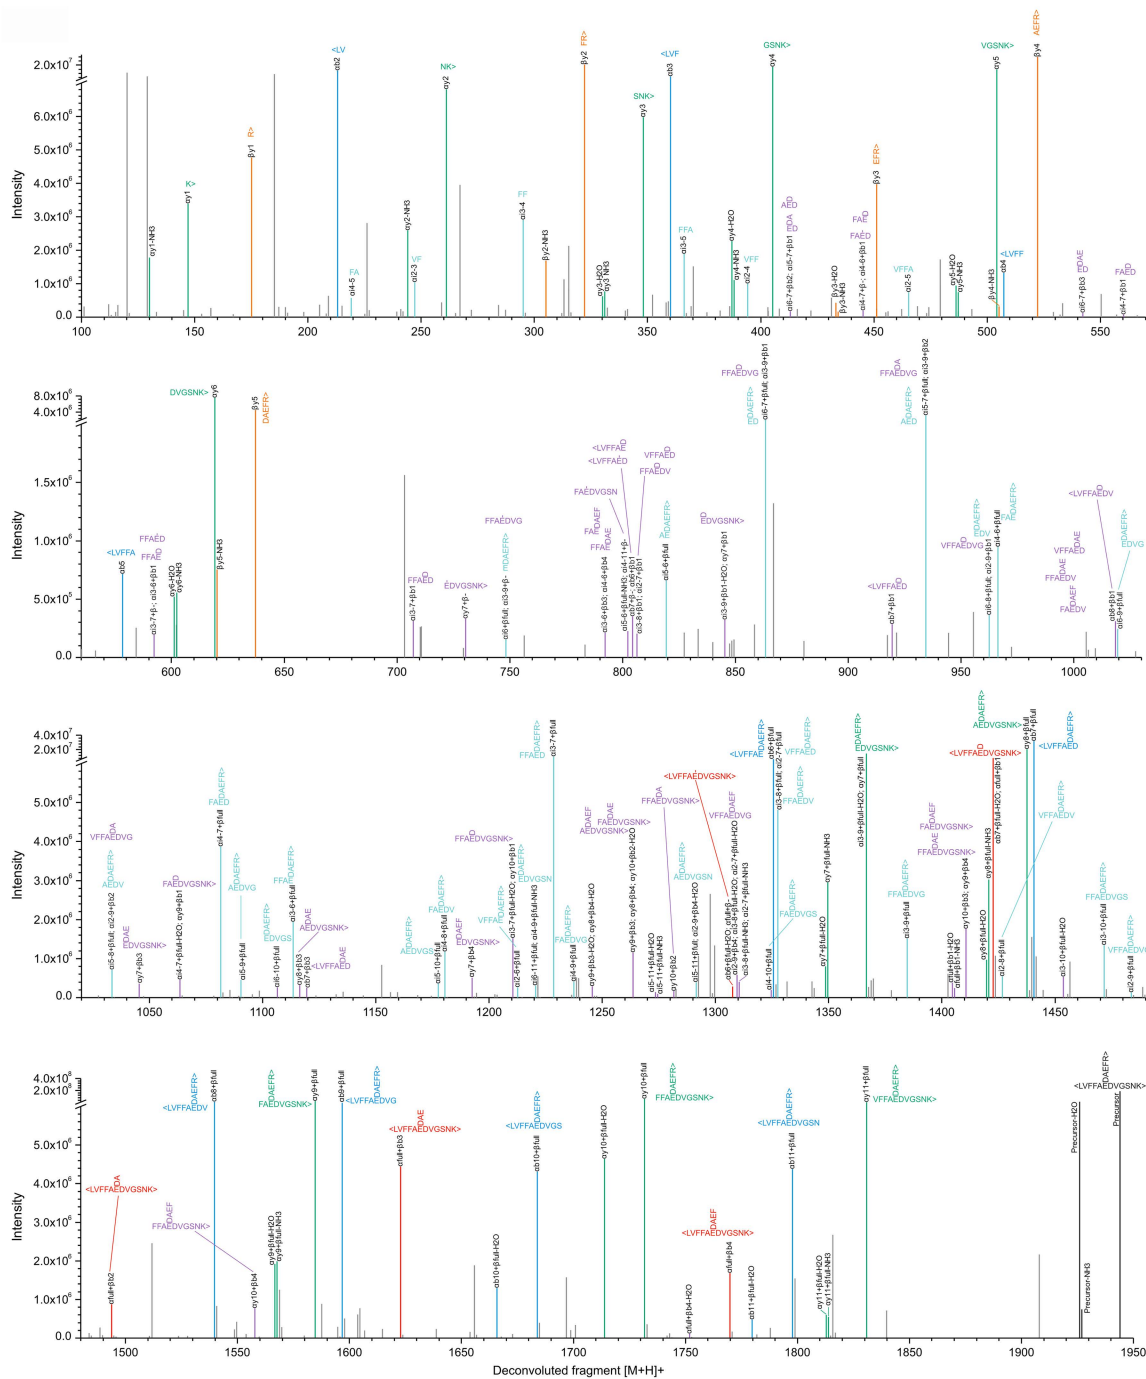

**b**

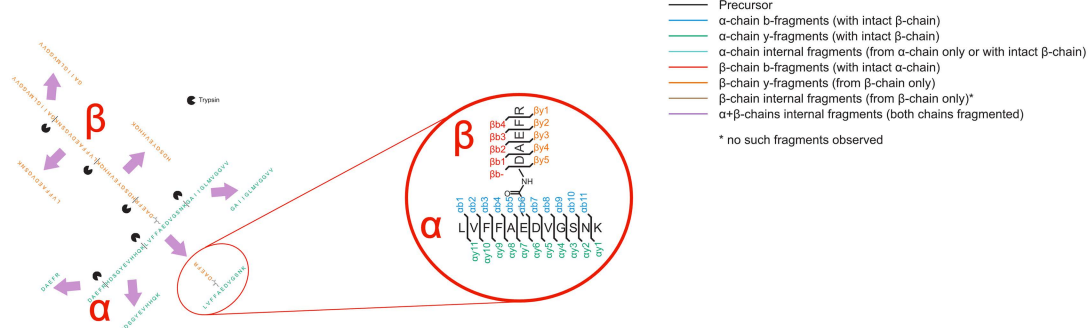

**Supplementary Table 1. A $\beta$  species identified by MS/MS using PEAKS Studio of LC-MS/MS from SEC-isolated A $\beta$  monomers.**  $\Delta m$  = relative mass deviation between measured and theoretical masses.  $-10\lg P$  is the PEAKS Studio identification score using the specified settings described in Supplementary information, section *Specific PEAKS Studio 8.5 processing parameters for scores given in Suppl. Table 1*, where 200 is the best value obtainable. The numbers in the respective sample columns are peak areas as determined by PEAKS Studio. All other numbers reflect the best match in the overall dataset.

| Sequence                                  | Peptide | Start | End | Length | PTM | RT [min] | Mass [Da] | m/z       | z | $\Delta m$ [ppm] | $-10\lg P$ | 464 M    | 1242 M   | 1167 M   | 722 M    | 1185 M   |
|-------------------------------------------|---------|-------|-----|--------|-----|----------|-----------|-----------|---|------------------|------------|----------|----------|----------|----------|----------|
| DAEFRHDSGYEVHHQKLVFFAEDVGSNKGAIIGLMVVG    | 1-37    | 1     | 37  | 37     |     | 7.17     | 4071.9900 | 1358.3373 | 3 | 0.0              | 200        | 2.44E+06 | 1.76E+08 |          |          | 1.64E+06 |
| DAEFRHDSGYEVHHQKLVFFAEDVGSNKGAIIGLmVG     | 1-37ox  | 1     | 37  | 37     | Mox | 6.74     | 4087.9849 | 1023.0043 | 4 | 0.8              | 200        |          | 1.74E+07 |          |          |          |
| AEFRHDSGYEVHHQKLVFFAEDVGSNKGAIIGLMVVG     | 2-37    | 2     | 37  | 36     |     | 7.67     | 3956.9631 | 990.2479  | 4 | -0.1             | 200        |          | 7.03E+07 |          |          |          |
| DAEFRHDSGYEVHHQKLVFFAEDVGSNKGAIIGLMVGG    | 1-38    | 1     | 38  | 38     |     | 7.30     | 4129.0117 | 1377.3442 | 3 | -0.2             | 200        | 5.41E+06 | 7.29E+08 |          |          |          |
| DAEFRHDSGYEVHHQKLVFFAEDVGSNKGAIIGLmVGG    | 1-38ox  | 1     | 38  | 38     | Mox | 6.73     | 4145.0063 | 1037.2585 | 4 | -0.3             | 200        | 1.42E+06 | 5.42E+07 |          |          |          |
| AEFRHDSGYEVHHQKLVFFAEDVGSNKGAIIGLMVGG     | 2-38    | 2     | 38  | 37     |     | 7.93     | 4013.9846 | 1004.5036 | 4 | 0.2              | 200        |          | 7.23E+07 |          |          |          |
| AEFRHDSGYEVHHQKLVFFAEDVGSNKGAIIGLmVGG     | 2-38ox  | 2     | 38  | 37     | Mox | 7.34     | 4029.9795 | 1008.5015 | 4 | -0.7             | 200        |          | 4.94E+07 |          |          |          |
| DAEFRHDSGYEVHHQKLVFFAEDVGSNKGAIIGLMVGGV   | 1-39    | 1     | 39  | 39     |     | 7.52     | 4228.0801 | 1058.0293 | 4 | 1.9              | 200        |          | 2.91E+08 |          |          |          |
| DAEFRHDSGYEVHHQKLVFFAEDVGSNKGAIIGLmVGGV   | 1-39ox  | 1     | 39  | 39     | Mox | 6.92     | 4244.0747 | 1062.0261 | 4 | 0.2              | 200        |          | 1.25E+07 |          |          |          |
| AEFRHDSGYEVHHQKLVFFAEDVGSNKGAIIGLMVGGV    | 2-39    | 2     | 39  | 38     |     | 8.28     | 4113.0527 | 1029.2778 | 4 | 7.2              | 200        |          | 3.51E+07 |          |          |          |
| DAEFRHDSGYEVHHQKLVFFAEDVGSNKGAIIGLMVGGVV  | 1-40    | 1     | 40  | 40     |     | 8.14     | 4327.1484 | 1082.7964 | 4 | 1.9              | 200        | 2.65E+08 | 9.17E+08 |          | 1.66E+06 | 3.42E+07 |
| DAEFRHDSGYEVHHQKLVFFAEDVGSNKGAIIGLmVGGVV  | 1-40ox  | 1     | 40  | 40     | Mox | 7.39     | 4343.1431 | 1448.7229 | 3 | 0.9              | 200        | 9.61E+07 | 1.80E+08 |          |          | 2.06E+06 |
| AEFRHDSGYEVHHQKLVFFAEDVGSNKGAIIGLMVGGVV   | 2-40    | 2     | 40  | 39     |     | 8.75     | 4212.1216 | 1054.0381 | 4 | 0.4              | 200        | 4.02E+07 | 6.24E+08 |          |          | 5.34E+06 |
| AEFRHDSGYEVHHQKLVFFAEDVGSNKGAIIGLmVGGVV   | 2-40ox  | 2     | 40  | 39     | Mox | 7.88     | 4228.1162 | 1058.0361 | 4 | -0.2             | 200        | 1.95E+07 | 6.58E+07 |          |          |          |
| EFRHDSGYEVHHQKLVFFAEDVGSNKGAIIGLMVGGVV    | 3-40    | 3     | 40  | 38     |     | 8.69     | 4141.0845 | 1036.2799 | 4 | 1.5              | 200        |          | 3.74E+07 |          |          |          |
| eFRHDSGYEVHHQKLVFFAEDVGSNKGAIIGLMVGGVV    | p3-40   | 3     | 40  | 38     | pE  | 9.55     | 4123.0737 | 1031.7781 | 4 | 2.3              | 200        | 2.34E+07 | 9.37E+07 |          |          |          |
| FRHDSGYEVHHQKLVFFAEDVGSNKGAIIGLMVGGVV     | 4-40    | 4     | 40  | 37     |     | 9.49     | 4012.0417 | 1004.0197 | 4 | 1.9              | 200        |          | 4.32E+07 |          |          |          |
| DSGYEVHHQKLVFFAEDVGSNKGAIIGLMVGGVV        | 7-40    | 7     | 40  | 34     |     | 8.51     | 3571.8132 | 1191.6152 | 3 | 3.0              | 200        | 5.16E+06 | 1.07E+07 |          |          | 9.27E+06 |
| DSGYEVHHQKLVFFAEDVGSNKGAIIGLmVGGVV        | 7-40ox  | 7     | 40  | 34     | Mox | 7.56     | 3587.8081 | 897.9610  | 4 | 1.9              | 200        | 7.26E+06 |          |          |          |          |
| SGYEVHHQKLVFFAEDVGSNKGAIIGLMVGGVV         | 8-40    | 8     | 40  | 33     |     | 9.08     | 3456.7864 | 1153.2684 | 3 | -0.8             | 200        | 2.88E+07 | 8.27E+07 |          |          | 1.43E+07 |
| SGYEVHHQKLVFFAEDVGSNKGAIIGLmVGGVV         | 8-40ox  | 8     | 40  | 33     | Mox | 8.11     | 3472.7812 | 1158.6050 | 3 | 3.4              | 200        | 9.31E+06 |          |          |          |          |
| GYEVHHQKLVFFAEDVGSNKGAIIGLMVGGVV          | 9-40    | 9     | 40  | 32     |     | 9.22     | 3369.7544 | 1124.2603 | 3 | 1.3              | 200        | 2.52E+07 | 5.10E+07 |          |          | 5.26E+06 |
| EVHHQKLVFFAEDVGSNKGAIIGLMVGGVV            | 11-40   | 11    | 40  | 30     |     | 9.00     | 3149.6694 | 1050.9004 | 3 | 3.1              | 200        |          | 9.45E+06 |          |          |          |
| eVHHQKLVFFAEDVGSNKGAIIGLMVGGVV            | p11-40  | 11    | 40  | 30     | pE  | 9.89     | 3131.6589 | 1044.8950 | 3 | 1.4              | 200        |          | 1.13E+07 |          |          |          |
| DAEFRHDSGYEVHHQKLVFFAEDVGSNKGAIIGLMVGGVIA | 1-42    | 1     | 42  | 42     |     | 8.56     | 4511.2695 | 1504.7668 | 3 | 2.0              | 200        | 9.55E+07 | 1.63E+08 | 6.26E+06 | 1.47E+07 | 3.44E+08 |
| DAEFRHDSGYEVHHQKLVFFAEDVGSNKGAIIGLmVGGVIA | 1-42ox  | 1     | 42  | 42     | Mox | 7.79     | 4527.2642 | 1132.8245 | 4 | 1.0              | 200        | 5.25E+07 | 2.91E+07 | 1.28E+07 | 2.53E+06 | 1.23E+08 |

|                                             |          |    |    |    |         |       |           |           |   |      |     |          |          |          |          |          |
|---------------------------------------------|----------|----|----|----|---------|-------|-----------|-----------|---|------|-----|----------|----------|----------|----------|----------|
| AEFRHDSGYEVHHQKLVFFAEDVGSNKGAIIGLMVGGVVIA   | 2-42     | 2  | 42 | 41 |         | 9.18  | 4396.2427 | 1100.0686 | 4 | 0.6  | 200 | 8.42E+07 | 9.20E+07 | 1.39E+07 | 1.67E+07 | 1.20E+08 |
| AEFRHDSGYEVHHQKLVFFAEDVGSNKGAIIGLmVGGVVIA   | 2-42ox   | 2  | 42 | 41 | Mox     | 8.41  | 4412.2373 | 1104.0691 | 4 | 2.3  | 200 | 2.28E+07 |          | 1.92E+06 | 3.88E+06 | 9.78E+06 |
| EFRHDSGYEVHHQKLVFFAEDVGSNKGAIIGLMVGGVVIA    | 3-42     | 3  | 42 | 40 |         | 9.17  | 4325.2056 | 1082.3093 | 4 | 0.6  | 200 | 1.45E+06 | 3.75E+01 |          |          | 2.10E+07 |
| eFRHDSGYEVHHQKLVFFAEDVGSNKGAIIGLMVGGVVIA    | p3-42    | 3  | 42 | 40 | pE      | 9.85  | 4307.1948 | 1077.8071 | 4 | 1.1  | 200 | 4.61E+07 | 1.93E+08 | 1.14E+08 | 2.00E+08 | 3.85E+08 |
| eFRHDSGYEVHHQKLVFFAEDVGSNKGAIIGLmVGGVVIA    | p3-42ox  | 3  | 42 | 40 | pE; Mox | 9.13  | 4323.1899 | 1081.8057 | 4 | 0.8  | 200 | 1.28E+07 | 7.31E+07 | 6.28E+07 | 5.69E+07 | 4.16E+07 |
| FRHDSGYEVHHQKLVFFAEDVGSNKGAIIGLMVGGVVIA     | 4-42     | 4  | 42 | 39 |         | 9.90  | 4196.1631 | 1050.0486 | 4 | 0.5  | 200 | 1.26E+06 | 4.25E+07 | 2.22E+07 | 1.58E+07 |          |
| FRHDSGYEVHHQKLVFFAEDVGSNKGAIIGLmVGGVVIA     | 4-42ox   | 4  | 42 | 39 | Mox     | 9.09  | 4212.1577 | 1054.0496 | 4 | 2.7  | 200 |          |          | 1.09E+07 |          |          |
| RHDSGYEVHHQKLVFFAEDVGSNKGAIIGLMVGGVVIA      | 5-42     | 5  | 42 | 38 |         | 9.49  | 4049.0945 | 1013.2809 | 4 | 0.0  | 200 |          |          | 9.99E+06 | 1.82E+07 | 3.08E+07 |
| RHDSGYEVHHQKLVFFAEDVGSNKGAIIGLmVGGVVIA      | 5-42ox   | 5  | 42 | 38 | Mox     | 8.51  | 4065.0894 | 1017.2789 | 4 | -0.7 | 200 |          |          | 2.42E+06 | 6.19E+06 |          |
| HDSGYEVHHQKLVFFAEDVGSNKGAIIGLMVGGVVIA       | 6-42     | 6  | 42 | 37 |         | 9.19  | 3892.9934 | 974.2577  | 4 | 2.1  | 200 | 2.49E+07 | 1.73E+07 | 8.73E+05 |          | 3.73E+07 |
| HDSGYEVHHQKLVFFAEDVGSNKGAIIGLmVGGVVIA       | 6-42ox   | 6  | 42 | 37 | Mox     | 8.14  | 3908.9883 | 978.2529  | 4 | -1.4 | 200 | 5.47E+06 |          | 3.17E+06 | 2.85E+06 |          |
| DSGYEVHHQKLVFFAEDVGSNKGAIIGLMVGGVVIA        | 7-42     | 7  | 42 | 36 |         | 9.07  | 3755.9343 | 939.9922  | 4 | 1.4  | 200 | 3.30E+07 | 1.41E+08 | 3.83E+07 | 3.12E+07 | 2.06E+08 |
| DSGYEVHHQKLVFFAEDVGSNKGAIIGLmVGGVVIA        | 7-42ox   | 7  | 42 | 36 | Mox     | 8.09  | 3771.9294 | 943.9919  | 4 | 2.4  | 200 | 5.13E+07 |          | 1.97E+07 | 1.73E+07 | 1.68E+07 |
| SGYEVHHQKLVFFAEDVGSNKGAIIGLMVGGVVIA         | 8-42     | 8  | 42 | 35 |         | 9.59  | 3640.9075 | 1214.6449 | 3 | 1.5  | 200 | 7.96E+07 | 2.85E+07 | 4.29E+07 | 7.69E+07 | 6.38E+07 |
| SGYEVHHQKLVFFAEDVGSNKGAIIGLmVGGVVIA         | 8-42ox   | 8  | 42 | 35 | Mox     | 8.67  | 3656.9023 | 915.2333  | 4 | 0.5  | 200 | 1.75E+07 | 9.41E+06 | 2.21E+07 | 2.30E+07 |          |
| GYEVHHQKLVFFAEDVGSNKGAIIGLMVGGVVIA          | 9-42     | 9  | 42 | 34 |         | 9.71  | 3553.8755 | 889.4766  | 4 | 0.5  | 200 | 2.14E+07 | 9.17E+07 | 2.24E+07 | 1.01E+08 | 9.29E+07 |
| GYEVHHQKLVFFAEDVGSNKGAIIGLmVGGVVIA          | 9-42ox   | 9  | 42 | 34 | Mox     | 8.79  | 3569.8704 | 893.4760  | 4 | 1.3  | 200 | 2.26E+07 | 1.29E+07 | 2.87E+07 | 2.27E+07 | 1.59E+07 |
| YEVHHQKLVFFAEDVGSNKGAIIGLMVGGVVIA           | 10-42    | 10 | 42 | 33 |         | 9.75  | 3496.8540 | 1166.6282 | 3 | 2.5  | 200 | 1.16E+07 | 5.19E+07 | 4.30E+07 | 5.77E+07 | 4.87E+07 |
| YEVHHQKLVFFAEDVGSNKGAIIGLmVGGVVIA           | 10-42ox  | 10 | 42 | 33 | Mox     | 8.79  | 3512.8489 | 1171.9576 | 3 | 0.6  | 200 |          |          | 9.34E+06 | 1.55E+07 |          |
| EVHHQKLVFFAEDVGSNKGAIIGLMVGGVVIA            | 11-42    | 11 | 42 | 32 |         | 9.56  | 3333.7908 | 1112.2717 | 3 | 0.8  | 200 | 5.67E+06 | 2.40E+07 |          |          | 1.36E+07 |
| EVHHQKLVFFAEDVGSNKGAIIGLmVGGVVIA            | 11-42ox  | 11 | 42 | 32 | Mox     | 8.76  | 3349.7856 | 1117.6028 | 3 | 0.3  | 200 |          |          |          |          |          |
| eVHHQKLVFFAEDVGSNKGAIIGLMVGGVVIA            | p11-42   | 11 | 42 | 32 | pE      | 10.41 | 3315.7800 | 1106.2695 | 3 | 2.0  | 200 | 1.59E+07 | 1.43E+08 | 5.25E+07 | 7.46E+07 | 4.21E+08 |
| eVHHQKLVFFAEDVGSNKGAIIGLmVGGVVIA            | p11-42ox | 11 | 42 | 32 | pE; Mox | 9.37  | 3331.7749 | 1111.6028 | 3 | 3.5  | 200 | 1.84E+07 | 1.01E+07 | 1.00E+08 | 6.99E+07 | 1.46E+07 |
| LVFFAEDVGSNKGAIIGLMVGGVVIA                  | 17-42    | 17 | 42 | 26 |         | 10.48 | 2575.4082 | 1288.7136 | 2 | 1.7  | 200 |          | 1.41E+06 |          | 3.37E+06 |          |
| DAEFRHDSGYEVHHQKLVFFAEDVGSNKGAIIGLMVGGVVIAT | 1-43     | 1  | 43 | 43 |         | 9.15  | 4612.3174 | 1154.0837 | 4 | -2.5 | 200 |          |          |          |          | 2.72E+07 |
| DAEFRHDSGYEVHHQKLVFFAEDVGSNKGAIIGLmVGGVVIAT | 1-43ox   | 1  | 43 | 43 | Mox     | 7.95  | 4628.3120 | 1158.0884 | 4 | 2.7  | 137 | 3.74E+06 |          |          |          |          |
| AEFRHDSGYEVHHQKLVFFAEDVGSNKGAIIGLMVGGVVIAT  | 2-43     | 2  | 43 | 42 |         | 9.79  | 4497.2900 | 1125.3330 | 4 | 2.9  | 101 |          |          |          |          |          |
| eFRHDSGYEVHHQKLVFFAEDVGSNKGAIIGLMVGGVVIAT   | p3-43    | 3  | 43 | 41 | pE      | 10.07 | 4408.2427 | 1103.0696 | 4 | 1.5  | 200 | 1.28E+06 | 5.14E+06 | 3.49E+06 | 7.42E+06 | 1.47E+07 |
| FRHDSGYEVHHQKLVFFAEDVGSNKGAIIGLMVGGVVIAT    | 4-43     | 4  | 43 | 40 |         | 10.25 | 4297.2104 | 1075.3112 | 4 | 1.2  | 200 |          |          |          |          |          |
| DSGYEVHHQKLVFFAEDVGSNKGAIIGLMVGGVVIAT       | 7-43     | 7  | 43 | 37 |         | 9.24  | 3856.9822 | 1286.6714 | 3 | 2.6  | 135 | 7.67E+06 |          |          |          |          |
| SGYEVHHQKLVFFAEDVGSNKGAIIGLMVGGVVIAT        | 8-43     | 8  | 43 | 36 |         | 9.93  | 3741.9551 | 1248.3276 | 3 | 1.6  | 200 |          | 6.64E+06 |          |          |          |
| GYEVHHQKLVFFAEDVGSNKGAIIGLMVGGVVIAT         | 9-43     | 9  | 43 | 35 |         | 9.84  | 3654.9231 | 1219.3174 | 3 | 2.0  | 151 |          | 7.02E+06 | 4.86E+06 |          | 2.03E+07 |
| eVHHQKLVFFAEDVGSNKGAIIGLMVGGVVIAT           | p11-43   | 11 | 43 | 33 | pE      | 10.48 | 3416.8279 | 1139.9517 | 3 | 1.5  | 200 | 1.69E+06 | 1.54E+07 | 1.98E+06 | 1.20E+07 | 3.87E+07 |
| eVHHQKLVFFAEDVGSNKGAIIGLmVGGVVIAT           | p11-43ox | 11 | 43 | 33 | pE; Mox | 9.36  | 3432.8228 | 1145.2811 | 3 | -0.3 | 200 |          |          | 8.36E+06 | 1.26E+07 |          |

**Supplementary Table 2. MS/MS-identified cross-linked A $\beta$  in SEC-isolated ~7 kDa A $\beta$  from brain #1242.** PEAKS Studio and Xtract were used to deconvolute LC-MS/MS spectra; all peaks were then evaluated manually. <sup>a</sup> $\Delta m$  = relative mass deviation between measured and theoretical masses; <sup>b</sup> \* denotes scans presented in Supplementary Figs. 11 and 12; <sup>c</sup> -10lgP is the PEAKS Studio identification score using the specified settings described in Supplementary information, section *Specific PEAKS Studio 8.5 processing parameters for scores given in Supplementary Table 2*, missing value = no score determined.

| Dimer ( $\alpha \times \beta$ )         | m/z      | Charge | Exp. mass [Da] | Theor. mass -18 link [Da] | $\Delta m^a$ [ppm] | $\Delta m$ [Da] | RT [min] | Scan <sup>b</sup> | -10lgP <sup>c</sup> | $\alpha$ -chain only b-ions | y-ions  | $\alpha \times \beta$ -chains b-ions |
|-----------------------------------------|----------|--------|----------------|---------------------------|--------------------|-----------------|----------|-------------------|---------------------|-----------------------------|---------|--------------------------------------|
| 1-37 $\times$ 1-38 + 1-38 $\times$ 1-37 | 1364.834 | 6      | 8182.963       | 8182.991                  | -3.4               | -0.03           | 10.0795  | 1484              | 6.73                | 6                           | 4 + 3   | 7 + 5                                |
| 1-38 $\times$ 1-38                      | 1374.169 | 6      | 8238.970       | 8240.013                  | -126.5             | -1.04           | 10.1658  | 1494              | 15.84               | 3                           | 3       | 14                                   |
| 1-38 $\times$ 1-38                      | 1649.007 | 5      | 8239.999       | 8240.013                  | -1.7               | -0.01           | 10.1968  | 1498              |                     | 3                           | 2       | 4                                    |
|                                         |          |        |                |                           |                    |                 |          |                   |                     |                             |         |                                      |
| 1-38 $\times$ 1-39 + 1-39 $\times$ 1-38 | 1391.021 | 6      | 8340.082       | 8339.081                  | 120.0              | 1.00            | 10.2804  | 1508              | 10.47               | 3                           | 4 + 3   | 7 + 6                                |
|                                         |          |        |                |                           |                    |                 |          |                   |                     |                             |         |                                      |
| 1-37 $\times$ 1-40 + 1-40 $\times$ 1-37 | 1397.856 | 6      | 8381.092       | 8381.128                  | -4.3               | -0.04           | 10.339   | 1515              | 16.79               | 7                           | 6 + 6   | 11 + 13                              |
| 1-37 $\times$ 1-40 + 1-40 $\times$ 1-37 | 1198.164 | 7      | 8380.097       | 8381.128                  | -123.1             | -1.03           | 10.3949  | 1522              | 15.83               | 7                           | 4 + 3   | 8 + 6                                |
| 1-37 $\times$ 1-40 + 1-40 $\times$ 1-37 | 1397.853 | 6      | 8381.077       | 8381.128                  | -6.1               | -0.05           | 10.4258  | 1526              | 20.71               | 5                           | 6 + 6   | 8 + 8                                |
|                                         |          |        |                |                           |                    |                 |          |                   |                     |                             |         |                                      |
| 1-38 $\times$ 1-40 + 1-40 $\times$ 1-38 | 1407.357 | 6      | 8438.096       | 8438.149                  | -6.3               | -0.05           | 10.3672  | 1519              | 11.13               | 6                           | 6 + 6   | 7 + 8                                |
| 1-38 $\times$ 1-40 + 1-40 $\times$ 1-38 | 1688.636 | 5      | 8438.144       | 8438.149                  | -0.7               | -0.01           | 10.4442  | * 1528            | 23.29               | 12                          | 10 + 13 | 14 + 14                              |
| 1-38 $\times$ 1-40 + 1-40 $\times$ 1-38 | 1206.451 | 7      | 8438.109       | 8438.149                  | -4.8               | -0.04           | 10.4535  | 1529              | 24.37               | 9                           | 4 + 4   | 15 + 14                              |
| 1-38 $\times$ 1-40 + 1-40 $\times$ 1-38 | 1407.354 | 6      | 8438.083       | 8438.149                  | -7.8               | -0.07           | 10.4844  | 1533              | 24.00               | 12                          | 6 + 6   | 20 + 16                              |
| 1-38 $\times$ 1-40 + 1-40 $\times$ 1-38 | 1688.838 | 5      | 8439.153       | 8438.149                  | 118.9              | 1.00            | 10.5403  | 1540              |                     | 3                           | 5 + 5   | 3 + 2                                |
|                                         |          |        |                |                           |                    |                 |          |                   |                     |                             |         |                                      |
| 1-39 $\times$ 1-40 + 1-40 $\times$ 1-39 | 1423.872 | 6      | 8537.191       | 8537.218                  | -3.2               | -0.03           | 10.5213  | 1537              | 14.62               | 3                           | 7 + 4   | 8 + 7                                |
| 1-39 $\times$ 1-40 + 1-40 $\times$ 1-39 | 1708.445 | 5      | 8537.187       | 8537.218                  | -3.7               | -0.03           | 10.5772  | 1544              | 21.80               | 8                           | 7 + 5   | 9 + 10                               |
| 1-39 $\times$ 1-40 + 1-40 $\times$ 1-39 | 1423.874 | 6      | 8537.198       | 8537.218                  | -2.4               | -0.02           | 10.5989  | 1547              | 22.10               | 11                          | 6 + 6   | 15 + 15                              |
| 1-39 $\times$ 1-40 + 1-40 $\times$ 1-39 | 1220.753 | 7      | 8538.217       | 8537.218                  | 117.0              | 1.00            | 10.6174  | 1549              |                     | 4                           | 4 + 3   | 5 + 6                                |
|                                         |          |        |                |                           |                    |                 |          |                   |                     |                             |         |                                      |
| 1-40 $\times$ 1-40                      | 1440.549 | 6      | 8637.250       | 8636.286                  | 111.6              | 0.96            | 10.676   | 1556              | 26.95               | 8                           | 9       | 19                                   |
| 1-40 $\times$ 1-40                      | 1234.760 | 7      | 8636.271       | 8636.286                  | -1.8               | -0.02           | 10.7319  | 1563              | 27.25               | 12                          | 7       | 23                                   |
| 1-40 $\times$ 1-40                      | 1440.389 | 6      | 8636.288       | 8636.286                  | 0.2                | 0.00            | 10.7721  | * 1568            | 28.92               | 13                          | 11      | 26                                   |
| 1-40 $\times$ 1-40                      | 1728.261 | 5      | 8636.270       | 8636.286                  | -1.9               | -0.02           | 10.7906  | 1570              | 28.47               | 13                          | 15      | 17                                   |
| 1-40 $\times$ 1-40                      | 1080.546 | 8      | 8636.307       | 8636.286                  | 2.4                | 0.02            | 10.7998  | 1571              | 20.66               | 5                           | 5       | 14                                   |
| 1-40 $\times$ 1-40                      | 1234.472 | 7      | 8634.255       | 8636.286                  | -235.2             | -2.03           | 10.8279  | 1575              |                     | 4                           | 6       | 13                                   |
| 1-40 $\times$ 1-40                      | 1440.383 | 6      | 8636.252       | 8636.286                  | -4.0               | -0.03           | 10.8866  | 1582              | 14.02               | 4                           | 6       | 8                                    |
|                                         |          |        |                |                           |                    |                 |          |                   |                     |                             |         |                                      |
| 2-38 $\times$ 1-40 + 2-40 $\times$ 1-38 | 1388.360 | 6      | 8324.116       | 8323.122                  | 119.4              | 0.99            | 10.7411  | 1564              | 23.58               | 8                           | 5 + 3   | 11 + 8                               |
|                                         |          |        |                |                           |                    |                 |          |                   |                     |                             |         |                                      |
| 2-40 $\times$ 1-40                      | 1705.455 | 5      | 8522.238       | 8521.259                  | 114.8              | 0.98            | 10.6945  | 1558              | 15.63               | 1                           | 9       | 8                                    |
| 2-40 $\times$ 1-40                      | 1421.384 | 6      | 8522.259       | 8521.259                  | 117.3              | 1.00            | 10.9729  | 1592              | 19.13               | 5                           | 7       | 10                                   |
| 2-40 $\times$ 1-40                      | 1705.653 | 5      | 8523.228       | 8521.259                  | 231.0              | 1.97            | 11.038   | 1600              |                     | 6                           | 9       | 14                                   |
| 2-40 $\times$ 1-40                      | 1421.215 | 6      | 8521.246       | 8521.259                  | -1.5               | -0.01           | 11.0597  | 1603              | 26.06               | 11                          | 7       | 24                                   |
| 2-40 $\times$ 1-40                      | 1218.322 | 7      | 8521.205       | 8521.259                  | -6.4               | -0.05           | 11.0966  | 1607              | 15.68               | 3                           | 4       | 7                                    |
| 1-40 $\times$ 1-42 + 1-42 $\times$ 1-40 | 1471.072 | 6      | 8820.387       | 8820.407                  | -2.3               | -0.02           | 11.0288  | 1599              |                     | 2                           | 2 + 4   | 6 + 4                                |

### Supplementary Table 3

| Peak list for Suppl. Fig. 11                         |           |                |                                        |                  |                 |
|------------------------------------------------------|-----------|----------------|----------------------------------------|------------------|-----------------|
| A $\beta$ 1-40 $\times$ 1-40; -H <sub>2</sub> O link |           |                |                                        |                  |                 |
| Scan 1568                                            |           |                |                                        |                  |                 |
| Charge 6+                                            |           |                |                                        |                  |                 |
| Selected m/z 1440.3887                               |           |                |                                        |                  |                 |
| RT 10.77 min                                         |           |                |                                        |                  |                 |
| Experimental<br>[M+H] <sup>+</sup> [Da]              | Intensity | Fragment label | Theoretical<br>[M+H] <sup>+</sup> [Da] | $\Delta$ m [ppm] | $\Delta$ m [Da] |
| 401.2173                                             | 28810     |                |                                        |                  |                 |
| 401.2173                                             | 36169     |                |                                        |                  |                 |
| 401.2207                                             | 36573     |                |                                        |                  |                 |
| 402.1796                                             | 1498      |                |                                        |                  |                 |
| 412.2546                                             | 15324     |                |                                        |                  |                 |
| 413.2209                                             | 2604      |                |                                        |                  |                 |
| 415.2364                                             | 10897     |                |                                        |                  |                 |
| 416.1956                                             | 8130      |                |                                        |                  |                 |
| 416.1973                                             | 7471      |                |                                        |                  |                 |
| 416.1973                                             | 7471      |                |                                        |                  |                 |
| 416.2273                                             | 35057     |                |                                        |                  |                 |
| 416.2273                                             | 27935     |                |                                        |                  |                 |
| 416.2314                                             | 36026     |                |                                        |                  |                 |
| 422.2395                                             | 1960      |                |                                        |                  |                 |
| 430.2473                                             | 9836      |                |                                        |                  |                 |
| 430.2481                                             | 8194      |                |                                        |                  |                 |
| 430.2652                                             | 107362    |                |                                        |                  |                 |
| 430.2673                                             | 74399     |                |                                        |                  |                 |
| 430.2673                                             | 107362    | y05            | 430.2666                               | 1.7              | 0.0007          |
| 438.2701                                             | 1995      |                |                                        |                  |                 |
| 438.3071                                             | 1893      |                |                                        |                  |                 |
| 444.2266                                             | 59886     |                |                                        |                  |                 |
| 444.2273                                             | 42941     |                |                                        |                  |                 |
| 444.2273                                             | 57340     |                |                                        |                  |                 |
| 455.2673                                             | 1327      |                |                                        |                  |                 |
| 458.2421                                             | 17140     |                |                                        |                  |                 |
| 463.1815                                             | 1899      | b04            | 463.1829                               | -3.0             | -0.0014         |
| 469.2833                                             | 4446      |                |                                        |                  |                 |
| 483.2921                                             | 2500      |                |                                        |                  |                 |
| 483.3273                                             | 2619      |                |                                        |                  |                 |
| 483.3273                                             | 2619      |                |                                        |                  |                 |
| 483.3276                                             | 2653      |                |                                        |                  |                 |

|          |       |     |          |     |        |
|----------|-------|-----|----------|-----|--------|
| 484.2862 | 592   |     |          |     |        |
| 484.3302 | 303   |     |          |     |        |
| 486.3096 | 6125  |     |          |     |        |
| 487.2693 | 13101 |     |          |     |        |
| 497.2529 | 2375  |     |          |     |        |
| 497.2573 | 2459  |     |          |     |        |
| 497.2573 | 2459  |     |          |     |        |
| 498.2559 | 601   |     |          |     |        |
| 498.2730 | 1110  |     |          |     |        |
| 501.2484 | 854   |     |          |     |        |
| 504.2559 | 1866  |     |          |     |        |
| 507.3021 | 927   |     |          |     |        |
| 512.2888 | 2311  |     |          |     |        |
| 514.3048 | 16922 |     |          |     |        |
| 515.2638 | 33764 |     |          |     |        |
| 515.2673 | 35049 |     |          |     |        |
| 515.3068 | 1712  |     |          |     |        |
| 516.2673 | 5406  |     |          |     |        |
| 521.3070 | 2592  |     |          |     |        |
| 525.3386 | 4650  |     |          |     |        |
| 526.3047 | 1639  |     |          |     |        |
| 528.3214 | 1564  |     |          |     |        |
| 529.2789 | 2502  |     |          |     |        |
| 529.3163 | 5046  |     |          |     |        |
| 538.3337 | 972   |     |          |     |        |
| 540.3495 | 5425  |     |          |     |        |
| 542.3278 | 1558  |     |          |     |        |
| 543.2933 | 5260  |     |          |     |        |
| 543.3308 | 943   |     |          |     |        |
| 556.2623 | 3275  |     |          |     |        |
| 557.3073 | 7096  |     |          |     |        |
| 557.3073 | 8920  |     |          |     |        |
| 557.3107 | 8799  |     |          |     |        |
| 561.3057 | 84485 |     |          |     |        |
| 561.3073 | 85163 | y06 | 561.3070 | 0.4 | 0.0002 |
| 561.3073 | 44916 |     |          |     |        |
| 568.3503 | 951   |     |          |     |        |
| 569.3099 | 5858  |     |          |     |        |
| 571.3210 | 5910  |     |          |     |        |
| 586.3368 | 34384 |     |          |     |        |
| 586.3373 | 33376 |     |          |     |        |



|          |       |     |          |       |         |
|----------|-------|-----|----------|-------|---------|
| 586.3373 | 18433 |     |          |       |         |
| 596.3173 | 20240 |     |          |       |         |
| 596.3217 | 20193 |     |          |       |         |
| 596.3682 | 2602  |     |          |       |         |
| 597.3712 | 1520  |     |          |       |         |
| 599.3558 | 1835  |     |          |       |         |
| 600.3527 | 5087  |     |          |       |         |
| 601.3534 | 86    |     |          |       |         |
| 606.3700 | 1340  |     |          |       |         |
| 610.3361 | 1654  |     |          |       |         |
| 611.3135 | 981   |     |          |       |         |
| 614.3273 | 70646 |     |          |       |         |
| 614.3273 | 32676 |     |          |       |         |
| 614.3317 | 69971 |     |          |       |         |
| 615.3345 | 1667  |     |          |       |         |
| 619.2773 | 11621 | b05 | 619.2840 | -10.9 | -0.0067 |
| 619.2773 | 7519  |     |          |       |         |
| 619.2819 | 11590 |     |          |       |         |
| 627.3883 | 5431  |     |          |       |         |
| 628.3442 | 22380 |     |          |       |         |
| 634.3903 | 1060  |     |          |       |         |
| 638.3668 | 1077  |     |          |       |         |
| 642.3626 | 1846  |     |          |       |         |
| 647.6424 | 909   |     |          |       |         |
| 653.4333 | 15014 |     |          |       |         |
| 653.4373 | 15713 |     |          |       |         |
| 654.3912 | 2470  |     |          |       |         |
| 656.3773 | 3903  |     |          |       |         |
| 656.3773 | 7549  |     |          |       |         |
| 656.3781 | 6754  |     |          |       |         |
| 657.3804 | 1041  |     |          |       |         |
| 674.3873 | 11545 | y07 | 674.3911 | -5.7  | -0.0038 |
| 674.3873 | 5702  |     |          |       |         |
| 674.3886 | 11017 |     |          |       |         |
| 675.3916 | 1077  |     |          |       |         |
| 682.3925 | 1304  |     |          |       |         |
| 684.4063 | 1781  |     |          |       |         |
| 685.3611 | 1433  |     |          |       |         |
| 685.4093 | 1008  |     |          |       |         |
| 687.3180 | 920   |     |          |       |         |
| 688.2940 | 921   |     |          |       |         |

|          |       |     |          |      |         |
|----------|-------|-----|----------|------|---------|
| 689.8041 | 1696  |     |          |      |         |
| 690.8071 | 1052  |     |          |      |         |
| 699.4173 | 6796  |     |          |      |         |
| 699.4173 | 12642 |     |          |      |         |
| 699.4200 | 12420 |     |          |      |         |
| 703.7973 | 7129  |     |          |      |         |
| 704.8038 | 1497  |     |          |      |         |
| 709.4050 | 3723  |     |          |      |         |
| 713.3997 | 3122  |     |          |      |         |
| 727.4138 | 35839 |     |          |      |         |
| 727.4173 | 34939 |     |          |      |         |
| 728.4173 | 8741  |     |          |      |         |
| 731.4073 | 22788 |     |          |      |         |
| 731.4073 | 64907 | y08 | 731.4126 | -7.2 | -0.0053 |
| 731.4102 | 64615 |     |          |      |         |
| 741.4250 | 19247 |     |          |      |         |
| 741.4273 | 17307 |     |          |      |         |
| 741.4273 | 8681  |     |          |      |         |
| 755.4470 | 8156  |     |          |      |         |
| 755.4473 | 8531  |     |          |      |         |
| 755.4473 | 4098  |     |          |      |         |
| 756.3373 | 7186  |     |          |      |         |
| 756.3373 | 16216 |     |          |      |         |
| 756.3401 | 16455 | b06 | 756.3429 | -3.7 | -0.0028 |
| 758.3273 | 7142  |     |          |      |         |
| 767.4760 | 6736  |     |          |      |         |
| 772.8312 | 4250  |     |          |      |         |
| 781.4193 | 1577  |     |          |      |         |
| 784.4287 | 2118  |     |          |      |         |
| 784.4725 | 11740 |     |          |      |         |
| 786.4793 | 231   |     |          |      |         |
| 798.4426 | 9810  |     |          |      |         |
| 812.4668 | 3747  |     |          |      |         |
| 818.8629 | 2632  |     |          |      |         |
| 826.8573 | 3456  |     |          |      |         |
| 827.8643 | 867   |     |          |      |         |
| 838.7336 | 958   |     |          |      |         |
| 840.4944 | 23151 |     |          |      |         |
| 841.3601 | 3982  |     |          |      |         |
| 841.4973 | 7375  |     |          |      |         |
| 844.4937 | 77755 |     |          |      |         |

|          |        |     |          |      |         |
|----------|--------|-----|----------|------|---------|
| 844.4973 | 79386  | y09 | 844.4966 | 0.8  | 0.0006  |
| 845.4973 | 5608   |     |          |      |         |
| 848.3785 | 1139   |     |          |      |         |
| 850.8744 | 1149   |     |          |      |         |
| 854.3400 | 1508   |     |          |      |         |
| 854.5066 | 6797   |     |          |      |         |
| 859.4177 | 1092   |     |          |      |         |
| 869.4893 | 2967   |     |          |      |         |
| 871.3668 | 100160 |     |          |      |         |
| 871.3673 | 103557 | b07 | 871.3698 | -3.0 | -0.0026 |
| 883.5367 | 8444   |     |          |      |         |
| 891.3918 | 1814   |     |          |      |         |
| 896.3770 | 1317   |     |          |      |         |
| 897.5073 | 13961  |     |          |      |         |
| 897.5123 | 11088  |     |          |      |         |
| 898.5147 | 3802   |     |          |      |         |
| 898.5173 | 6492   |     |          |      |         |
| 905.3895 | 5024   |     |          |      |         |
| 905.8909 | 878    |     |          |      |         |
| 909.7969 | 1028   |     |          |      |         |
| 911.5273 | 29982  |     |          |      |         |
| 911.5273 | 6608   |     |          |      |         |
| 911.5281 | 28120  |     |          |      |         |
| 912.5331 | 2672   |     |          |      |         |
| 934.7658 | 1337   |     |          |      |         |
| 940.5621 | 7000   |     |          |      |         |
| 956.5215 | 1078   |     |          |      |         |
| 957.5773 | 4821   |     |          |      |         |
| 957.5773 | 17426  |     |          |      |         |
| 957.5777 | 17786  | y10 | 957.5807 | -3.1 | -0.0030 |
| 958.3955 | 1380   | b08 | 958.4019 | -6.7 | -0.0064 |
| 958.5801 | 2256   |     |          |      |         |
| 958.9600 | 1814   |     |          |      |         |
| 959.9630 | 569    |     |          |      |         |
| 960.4226 | 2700   |     |          |      |         |
| 967.9640 | 1034   |     |          |      |         |
| 968.5573 | 8884   |     |          |      |         |
| 970.5602 | 1828   |     |          |      |         |
| 972.5357 | 1087   |     |          |      |         |
| 973.4885 | 1400   |     |          |      |         |
| 985.5469 | 7937   |     |          |      |         |

|           |       |     |           |      |         |
|-----------|-------|-----|-----------|------|---------|
| 985.5473  | 7748  |     |           |      |         |
| 997.5773  | 11647 |     |           |      |         |
| 997.5819  | 11689 |     |           |      |         |
| 1008.9624 | 965   |     |           |      |         |
| 1010.5967 | 28667 |     |           |      |         |
| 1010.5973 | 6779  |     |           |      |         |
| 1010.5973 | 28361 |     |           |      |         |
| 1028.6113 | 1581  | y11 | 1028.6178 | -6.3 | -0.0065 |
| 1029.0550 | 93    |     |           |      |         |
| 1042.5681 | 23983 |     |           |      |         |
| 1043.5673 | 12603 |     |           |      |         |
| 1043.5703 | 790   |     |           |      |         |
| 1044.5737 | 2062  |     |           |      |         |
| 1045.5732 | 362   |     |           |      |         |
| 1056.9355 | 1293  |     |           |      |         |
| 1060.4573 | 981   |     |           |      |         |
| 1060.5413 | 1118  |     |           |      |         |
| 1061.5161 | 1189  |     |           |      |         |
| 1075.0073 | 5284  |     |           |      |         |
| 1084.5675 | 2366  |     |           |      |         |
| 1084.6116 | 2189  |     |           |      |         |
| 1085.6326 | 8796  | y12 | 1085.6393 | -6.1 | -0.0067 |
| 1091.5327 | 2100  |     |           |      |         |
| 1096.6534 | 2117  |     |           |      |         |
| 1107.6167 | 2434  |     |           |      |         |
| 1111.6262 | 3340  |     |           |      |         |
| 1125.6173 | 14070 |     |           |      |         |
| 1125.6216 | 14026 |     |           |      |         |
| 1141.6353 | 35687 |     |           |      |         |
| 1142.6373 | 18403 |     |           |      |         |
| 1151.9194 | 3709  |     |           |      |         |
| 1162.2437 | 4978  |     |           |      |         |
| 1179.1249 | 5545  |     |           |      |         |
| 1180.5873 | 7551  |     |           |      |         |
| 1195.9712 | 4895  |     |           |      |         |
| 1198.6580 | 20742 |     |           |      |         |
| 1199.5754 | 6235  |     |           |      |         |
| 1199.5773 | 5873  |     |           |      |         |
| 1199.6573 | 9576  |     |           |      |         |
| 1200.5773 | 6882  |     |           |      |         |
| 1213.7273 | 10623 | y13 | 1213.7342 | -5.7 | -0.0070 |

|           |       |     |           |     |        |
|-----------|-------|-----|-----------|-----|--------|
| 1213.7288 | 9464  |     |           |     |        |
| 1219.6173 | 5342  |     |           |     |        |
| 1240.7073 | 8691  |     |           |     |        |
| 1250.5973 | 13069 |     |           |     |        |
| 1253.9473 | 8284  |     |           |     |        |
| 1255.6773 | 33702 |     |           |     |        |
| 1255.6800 | 30648 |     |           |     |        |
| 1293.2373 | 14334 |     |           |     |        |
| 1294.6373 | 7407  |     |           |     |        |
| 1294.9773 | 7060  |     |           |     |        |
| 1295.1473 | 4774  |     |           |     |        |
| 1297.1273 | 8684  |     |           |     |        |
| 1299.8073 | 12239 |     |           |     |        |
| 1303.6273 | 14779 |     |           |     |        |
| 1307.5251 | 20262 |     |           |     |        |
| 1307.5373 | 76241 | b11 | 1307.5293 | 6.1 | 0.0080 |
| 1307.6373 | 12809 |     |           |     |        |
| 1307.9673 | 7610  |     |           |     |        |
| 1309.1573 | 9000  |     |           |     |        |
| 1309.6473 | 6759  |     |           |     |        |
| 1309.8073 | 12552 |     |           |     |        |
| 1311.3073 | 12583 |     |           |     |        |
| 1311.6473 | 8387  |     |           |     |        |
| 1313.9773 | 11431 |     |           |     |        |
| 1315.3273 | 8767  |     |           |     |        |
| 1318.9873 | 13850 |     |           |     |        |
| 1319.6573 | 13447 |     |           |     |        |
| 1319.8173 | 6387  |     |           |     |        |
| 1320.9873 | 6269  |     |           |     |        |
| 1322.1473 | 15185 |     |           |     |        |
| 1322.6573 | 22271 |     |           |     |        |
| 1324.3173 | 5609  |     |           |     |        |
| 1326.4873 | 19656 |     |           |     |        |
| 1328.6573 | 57621 |     |           |     |        |
| 1329.3273 | 30387 |     |           |     |        |
| 1330.6673 | 10903 |     |           |     |        |
| 1332.9973 | 11960 |     |           |     |        |
| 1336.4973 | 8491  |     |           |     |        |
| 1336.6473 | 14435 |     |           |     |        |
| 1337.8273 | 16789 |     |           |     |        |
| 1337.9973 | 6671  |     |           |     |        |

|           |       |     |           |      |         |
|-----------|-------|-----|-----------|------|---------|
| 1339.4873 | 11903 |     |           |      |         |
| 1339.8373 | 10915 |     |           |      |         |
| 1341.8273 | 24781 |     |           |      |         |
| 1342.1573 | 12123 |     |           |      |         |
| 1344.3373 | 53241 |     |           |      |         |
| 1344.6673 | 93029 |     |           |      |         |
| 1349.9973 | 21705 |     |           |      |         |
| 1352.6673 | 24470 |     |           |      |         |
| 1354.7473 | 32089 |     |           |      |         |
| 1355.4973 | 9960  |     |           |      |         |
| 1356.6673 | 17738 |     |           |      |         |
| 1358.1673 | 18124 |     |           |      |         |
| 1358.5073 | 8498  |     |           |      |         |
| 1358.8273 | 11906 |     |           |      |         |
| 1359.3373 | 12588 |     |           |      |         |
| 1361.5073 | 12424 |     |           |      |         |
| 1361.8373 | 16422 |     |           |      |         |
| 1368.1773 | 18357 |     |           |      |         |
| 1373.8473 | 18601 |     |           |      |         |
| 1377.1773 | 11767 |     |           |      |         |
| 1378.3373 | 7808  |     |           |      |         |
| 1380.8473 | 9609  |     |           |      |         |
| 1381.0173 | 11527 |     |           |      |         |
| 1381.1873 | 15978 |     |           |      |         |
| 1384.3473 | 13670 |     |           |      |         |
| 1385.8573 | 40580 |     |           |      |         |
| 1386.0173 | 31830 |     |           |      |         |
| 1388.1873 | 9075  |     |           |      |         |
| 1388.8573 | 18812 |     |           |      |         |
| 1389.0173 | 8946  |     |           |      |         |
| 1391.1873 | 8441  |     |           |      |         |
| 1391.8773 | 11251 |     |           |      |         |
| 1392.6773 | 15169 |     |           |      |         |
| 1393.1973 | 13038 |     |           |      |         |
| 1393.5273 | 14277 |     |           |      |         |
| 1396.8573 | 15592 |     |           |      |         |
| 1397.6873 | 19322 |     |           |      |         |
| 1399.0273 | 10921 |     |           |      |         |
| 1399.1873 | 15639 |     |           |      |         |
| 1399.8573 | 8367  |     |           |      |         |
| 1406.5873 | 50724 | b12 | 1406.5977 | -7.4 | -0.0104 |

|           |       |     |           |      |         |
|-----------|-------|-----|-----------|------|---------|
| 1406.5935 | 20440 |     |           |      |         |
| 1411.2873 | 11279 |     |           |      |         |
| 1413.2073 | 7907  |     |           |      |         |
| 1415.6773 | 18078 |     |           |      |         |
| 1418.3773 | 11716 |     |           |      |         |
| 1420.6973 | 8200  |     |           |      |         |
| 1422.6873 | 12815 |     |           |      |         |
| 1429.7073 | 16948 |     |           |      |         |
| 1433.9073 | 19139 |     |           |      |         |
| 1437.7173 | 36535 |     |           |      |         |
| 1438.0473 | 39459 |     |           |      |         |
| 1441.0473 | 14752 |     |           |      |         |
| 1446.4973 | 10712 |     |           |      |         |
| 1449.1173 | 6616  |     |           |      |         |
| 1453.8173 | 8462  |     |           |      |         |
| 1460.7073 | 6708  |     |           |      |         |
| 1464.6973 | 22847 |     |           |      |         |
| 1468.7173 | 12203 |     |           |      |         |
| 1469.1273 | 8408  |     |           |      |         |
| 1470.5073 | 8342  |     |           |      |         |
| 1470.7173 | 17746 |     |           |      |         |
| 1471.1273 | 11731 |     |           |      |         |
| 1471.8273 | 46336 | y16 | 1471.8307 | -2.3 | -0.0034 |
| 1473.5173 | 7658  |     |           |      |         |
| 1474.3073 | 7376  |     |           |      |         |
| 1476.7273 | 9986  |     |           |      |         |
| 1481.9073 | 7212  |     |           |      |         |
| 1484.5073 | 7330  |     |           |      |         |
| 1486.3173 | 13325 |     |           |      |         |
| 1486.9173 | 15822 |     |           |      |         |
| 1488.3173 | 11058 |     |           |      |         |
| 1488.7173 | 12635 |     |           |      |         |
| 1489.5173 | 7315  |     |           |      |         |
| 1496.1273 | 7301  |     |           |      |         |
| 1502.7273 | 9480  |     |           |      |         |
| 1507.9273 | 15669 |     |           |      |         |
| 1508.1373 | 13061 |     |           |      |         |
| 1511.3473 | 12212 |     |           |      |         |
| 1512.9373 | 8631  |     |           |      |         |
| 1514.7473 | 15835 |     |           |      |         |
| 1515.5373 | 8788  |     |           |      |         |

|           |       |     |           |      |         |
|-----------|-------|-----|-----------|------|---------|
| 1515.6558 | 16561 |     |           |      |         |
| 1515.6573 | 9269  |     |           |      |         |
| 1517.9373 | 15321 |     |           |      |         |
| 1519.7473 | 12386 |     |           |      |         |
| 1520.9473 | 9538  |     |           |      |         |
| 1522.7473 | 10009 |     |           |      |         |
| 1523.5473 | 11236 |     |           |      |         |
| 1525.1473 | 9771  |     |           |      |         |
| 1526.5473 | 13593 |     |           |      |         |
| 1526.7373 | 22109 |     |           |      |         |
| 1528.1473 | 11721 |     |           |      |         |
| 1532.7473 | 20896 |     |           |      |         |
| 1533.9473 | 12891 |     |           |      |         |
| 1536.5573 | 13117 |     |           |      |         |
| 1539.7473 | 9556  |     |           |      |         |
| 1543.6473 | 10127 |     |           |      |         |
| 1543.6473 | 96616 | b13 | 1543.6566 | -6.0 | -0.0093 |
| 1543.6514 | 62798 |     |           |      |         |
| 1547.7573 | 12517 |     |           |      |         |
| 1553.5673 | 14944 |     |           |      |         |
| 1555.1673 | 8433  |     |           |      |         |
| 1555.3673 | 9918  |     |           |      |         |
| 1557.7573 | 8613  |     |           |      |         |
| 1557.9573 | 12479 |     |           |      |         |
| 1558.1573 | 24988 |     |           |      |         |
| 1558.3573 | 13595 |     |           |      |         |
| 1559.7673 | 65997 |     |           |      |         |
| 1562.7573 | 21629 |     |           |      |         |
| 1564.5573 | 9547  |     |           |      |         |
| 1564.9673 | 12327 |     |           |      |         |
| 1565.3673 | 9683  |     |           |      |         |
| 1565.6800 | 2719  |     |           |      |         |
| 1565.7673 | 11392 |     |           |      |         |
| 1567.3773 | 13830 |     |           |      |         |
| 1567.5673 | 15517 |     |           |      |         |
| 1568.1773 | 22791 |     |           |      |         |
| 1570.5673 | 51048 |     |           |      |         |
| 1570.8973 | 78875 | y17 | 1570.8991 | -1.1 | -0.0018 |
| 1570.9773 | 23946 |     |           |      |         |
| 1572.7873 | 22964 |     |           |      |         |
| 1575.5673 | 11520 |     |           |      |         |



|           |       |  |  |  |  |
|-----------|-------|--|--|--|--|
| 1575.9773 | 23997 |  |  |  |  |
| 1578.9773 | 12703 |  |  |  |  |
| 1580.1773 | 9218  |  |  |  |  |
| 1580.3773 | 9095  |  |  |  |  |
| 1580.5773 | 21453 |  |  |  |  |
| 1580.7673 | 13323 |  |  |  |  |
| 1587.0273 | 28122 |  |  |  |  |
| 1592.7873 | 22317 |  |  |  |  |
| 1599.7873 | 24583 |  |  |  |  |
| 1601.9873 | 16172 |  |  |  |  |
| 1602.1973 | 21918 |  |  |  |  |
| 1603.7973 | 20197 |  |  |  |  |
| 1606.7873 | 9021  |  |  |  |  |
| 1607.9973 | 17376 |  |  |  |  |
| 1608.7973 | 35915 |  |  |  |  |
| 1609.1873 | 14670 |  |  |  |  |
| 1609.3973 | 12082 |  |  |  |  |
| 1611.8073 | 19892 |  |  |  |  |
| 1612.9973 | 13598 |  |  |  |  |
| 1616.7973 | 86942 |  |  |  |  |
| 1622.8173 | 15559 |  |  |  |  |
| 1624.6073 | 7928  |  |  |  |  |
| 1624.7973 | 37521 |  |  |  |  |
| 1624.9973 | 12692 |  |  |  |  |
| 1628.7873 | 24484 |  |  |  |  |
| 1631.8073 | 14371 |  |  |  |  |
| 1634.0073 | 34190 |  |  |  |  |
| 1635.5973 | 11738 |  |  |  |  |
| 1637.8073 | 13008 |  |  |  |  |
| 1640.8073 | 25833 |  |  |  |  |
| 1647.6073 | 8528  |  |  |  |  |
| 1647.8073 | 10006 |  |  |  |  |
| 1651.0273 | 17023 |  |  |  |  |
| 1652.7128 | 15862 |  |  |  |  |
| 1652.7173 | 9909  |  |  |  |  |
| 1653.7177 | 1702  |  |  |  |  |
| 1653.8073 | 20719 |  |  |  |  |
| 1654.0073 | 12751 |  |  |  |  |
| 1659.8273 | 19016 |  |  |  |  |
| 1661.0473 | 18604 |  |  |  |  |
| 1668.8373 | 12323 |  |  |  |  |

|           |       |     |           |      |         |
|-----------|-------|-----|-----------|------|---------|
| 1677.8173 | 24728 |     |           |      |         |
| 1680.7073 | 39281 |     |           |      |         |
| 1680.7094 | 72197 | b14 | 1680.7155 | -3.6 | -0.0061 |
| 1686.8242 | 56521 |     |           |      |         |
| 1705.8473 | 14834 |     |           |      |         |
| 1706.0373 | 22677 |     |           |      |         |
| 1749.8573 | 16077 |     |           |      |         |
| 1760.8773 | 11718 |     |           |      |         |
| 1803.3899 | 12846 |     |           |      |         |
| 1808.7673 | 9623  |     |           |      |         |
| 1808.7673 | 35661 |     |           |      |         |
| 1808.7682 | 67087 | b15 | 1808.7741 | -3.3 | -0.0059 |
| 1821.8330 | 6873  |     |           |      |         |
| 1829.1260 | 8012  |     |           |      |         |
| 1856.6444 | 9655  |     |           |      |         |
| 1859.6869 | 5920  |     |           |      |         |
| 1866.8851 | 8201  |     |           |      |         |
| 1883.9288 | 7110  |     |           |      |         |
| 1888.4369 | 5411  |     |           |      |         |
| 1892.9307 | 13267 |     |           |      |         |
| 1905.9109 | 7770  |     |           |      |         |
| 1920.6826 | 9253  |     |           |      |         |
| 1921.6952 | 7449  |     |           |      |         |
| 1936.8573 | 37430 |     |           |      |         |
| 1936.8608 | 64960 | b16 | 1936.8690 | -4.3 | -0.0082 |
| 1948.9291 | 6975  |     |           |      |         |
| 1949.4606 | 8860  |     |           |      |         |
| 1977.4664 | 7032  |     |           |      |         |
| 1977.9786 | 12120 |     |           |      |         |
| 2010.0087 | 3562  |     |           |      |         |
| 2019.4836 | 4074  |     |           |      |         |
| 2020.0104 | 429   |     |           |      |         |
| 2031.9354 | 21801 |     |           |      |         |
| 2031.9373 | 11720 |     |           |      |         |
| 2048.3720 | 2934  |     |           |      |         |
| 2049.9468 | 12405 | b17 | 2049.9531 | -3.1 | -0.0063 |
| 2052.2559 | 409   |     |           |      |         |
| 2054.0107 | 2298  |     |           |      |         |
| 2055.0945 | 4002  |     |           |      |         |
| 2090.4200 | 4126  |     |           |      |         |
| 2100.0352 | 3071  |     |           |      |         |

|           |        |     |           |      |         |
|-----------|--------|-----|-----------|------|---------|
| 2133.7607 | 4754   |     |           |      |         |
| 2149.0137 | 30478  | b18 | 2149.0215 | -3.6 | -0.0078 |
| 2149.0173 | 18375  |     |           |      |         |
| 2150.0188 | 3517   |     |           |      |         |
| 2163.1016 | 3449   |     |           |      |         |
| 2177.4648 | 4187   |     |           |      |         |
| 2179.1274 | 3355   |     |           |      |         |
| 2204.0952 | 3727   |     |           |      |         |
| 2212.5894 | 11956  |     |           |      |         |
| 2214.5942 | 6193   |     |           |      |         |
| 2296.0773 | 8790   |     |           |      |         |
| 2296.0815 | 18227  | b19 | 2296.0899 | -3.7 | -0.0084 |
| 2313.1316 | 5142   |     |           |      |         |
| 2314.6240 | 3527   |     |           |      |         |
| 2444.1387 | 14007  |     |           |      |         |
| 2444.1473 | 8151   |     |           |      |         |
| 2708.3373 | 13762  |     |           |      |         |
| 2837.3873 | 7783   |     |           |      |         |
| 2897.4873 | 18439  |     |           |      |         |
| 3241.5873 | 13396  |     |           |      |         |
| 3369.6353 | 3673   |     |           |      |         |
| 3452.7397 | 4340   |     |           |      |         |
| 3476.6814 | 39715  |     |           |      |         |
| 3477.1724 | 47314  |     |           |      |         |
| 3534.6921 | 29471  |     |           |      |         |
| 3538.7334 | 9177   |     |           |      |         |
| 3652.8073 | 15426  |     |           |      |         |
| 3652.8203 | 20613  |     |           |      |         |
| 3668.8220 | 13321  |     |           |      |         |
| 3776.8499 | 12671  |     |           |      |         |
| 3866.3673 | 6270   |     |           |      |         |
| 3898.9073 | 6545   |     |           |      |         |
| 3928.9173 | 6475   |     |           |      |         |
| 3982.9487 | 464348 |     |           |      |         |
| 3983.4468 | 326735 |     |           |      |         |
| 3996.9626 | 14499  |     |           |      |         |
| 4000.9573 | 10565  |     |           |      |         |
| 4003.4473 | 5715   |     |           |      |         |
| 4104.5195 | 12881  |     |           |      |         |
| 4106.0107 | 12099  |     |           |      |         |
| 4310.1180 | 5433   |     |           |      |         |

|           |        |                |           |        |         |
|-----------|--------|----------------|-----------|--------|---------|
| 4425.1373 | 102844 |                |           |        |         |
| 4425.1520 | 173756 | 1-40x1-40, b01 | 4425.1726 | -4.7   | -0.0206 |
| 4625.2373 | 12577  | 1-40x1-40, b03 | 4625.2523 | -3.3   | -0.0151 |
| 4769.8573 | 10485  |                |           |        |         |
| 5180.4920 | 122069 | 1-40x1-40, b07 | 5180.5077 | -3.0   | -0.0157 |
| 5180.4973 | 105036 |                |           |        |         |
| 5615.6445 | 19174  | 1-40x1-40, b11 | 5616.6669 | -182.1 | -1.0224 |
| 5852.7930 | 10868  | 1-40x1-40, b13 | 5852.7945 | -0.2   | -0.0015 |
| 5853.7673 | 17190  |                |           |        |         |
| 5989.8273 | 23436  | 1-40x1-40, b14 | 5989.8534 | -4.4   | -0.0261 |
| 6458.1340 | 78917  | 1-40x1-40, b18 | 6458.1594 | -3.9   | -0.0254 |
| 6458.1373 | 35928  |                |           |        |         |
| 6605.2073 | 59845  | 1-40x1-40, b19 | 6605.2278 | -3.1   | -0.0205 |
| 6934.3173 | 5651   |                |           |        |         |
| 6952.3073 | 75705  | 1-40x1-40, b22 | 6952.3759 | -9.9   | -0.0686 |
| 7050.3673 | 34517  |                |           |        |         |
| 7050.3880 | 16503  |                |           |        |         |
| 7067.3735 | 244035 | 1-40x1-40, b23 | 7067.4029 | -4.2   | -0.0294 |
| 7067.3973 | 149283 |                |           |        |         |
| 7121.4173 | 5571   |                |           |        |         |
| 7149.4073 | 16645  |                |           |        |         |
| 7166.4500 | 341295 | 1-40x1-40, b24 | 7166.4713 | -3.0   | -0.0213 |
| 7166.4573 | 193184 |                |           |        |         |
| 7223.4730 | 106157 | 1-40x1-40, b25 | 7223.4927 | -2.7   | -0.0197 |
| 7223.4973 | 62782  |                |           |        |         |
| 7293.4773 | 11445  |                |           |        |         |
| 7309.4973 | 25868  | 1-40x1-40, b26 | 7310.5246 | -140.5 | -1.0273 |
| 7407.5273 | 8735   |                |           |        |         |
| 7424.5420 | 49326  | 1-40x1-40, b27 | 7424.5677 | -3.5   | -0.0257 |
| 7424.5473 | 41894  |                |           |        |         |
| 7425.5220 | 8590   |                |           |        |         |
| 7478.6073 | 7591   |                |           |        |         |
| 7517.6473 | 7975   |                |           |        |         |
| 7552.7173 | 41205  | 1-40x1-40, b28 | 7552.6627 | 7.2    | 0.0546  |
| 7553.6455 | 59837  |                |           |        |         |
| 7576.6773 | 11700  |                |           |        |         |
| 7608.6673 | 13523  | 1-40x1-40, b29 | 7609.6840 | -133.6 | -1.0167 |
| 7634.6773 | 15209  |                |           |        |         |
| 7650.8673 | 19611  |                |           |        |         |
| 7664.6773 | 15872  |                |           |        |         |
| 7677.7273 | 8649   |                |           |        |         |

|           |         |                |           |      |         |
|-----------|---------|----------------|-----------|------|---------|
| 7679.7010 | 174614  |                |           |      |         |
| 7680.7173 | 129642  | 1-40x1-40, b30 | 7680.7212 | -0.5 | -0.0040 |
| 7690.6973 | 14456   |                |           |      |         |
| 7720.7673 | 13325   |                |           |      |         |
| 7734.7473 | 10283   |                |           |      |         |
| 7742.7573 | 4783    |                |           |      |         |
| 7746.7773 | 19316   |                |           |      |         |
| 7753.7673 | 7045    |                |           |      |         |
| 7763.7973 | 8201    |                |           |      |         |
| 7765.8573 | 30556   |                |           |      |         |
| 7776.7573 | 37773   |                |           |      |         |
| 7793.7793 | 308297  | 1-40x1-40, b31 | 7793.8053 | -3.3 | -0.0260 |
| 7793.8173 | 256730  |                |           |      |         |
| 7796.7660 | 8083    |                |           |      |         |
| 7850.8073 | 16300   |                |           |      |         |
| 7862.8273 | 7555    |                |           |      |         |
| 7863.8373 | 19139   |                |           |      |         |
| 7878.7873 | 22500   |                |           |      |         |
| 7889.8673 | 47506   |                |           |      |         |
| 7894.8773 | 7472    |                |           |      |         |
| 7906.8584 | 393891  | 1-40x1-40, b32 | 7906.8894 | -3.9 | -0.0310 |
| 7906.8773 | 331150  |                |           |      |         |
| 7936.8673 | 10652   |                |           |      |         |
| 7945.8873 | 67513   |                |           |      |         |
| 7963.8857 | 354514  |                |           |      |         |
| 7963.9173 | 427188  | 1-40x1-40, b33 | 7963.9108 | 0.8  | 0.0065  |
| 7964.8873 | 7013    |                |           |      |         |
| 7965.8965 | 6927    |                |           |      |         |
| 7977.8773 | 23544   |                |           |      |         |
| 7991.8873 | 6278    |                |           |      |         |
| 8001.9073 | 7721    |                |           |      |         |
| 8020.9473 | 33419   |                |           |      |         |
| 8032.9873 | 15415   |                |           |      |         |
| 8034.9373 | 12019   |                |           |      |         |
| 8048.9473 | 82637   |                |           |      |         |
| 8059.9473 | 70568   |                |           |      |         |
| 8076.0150 | 5426    |                |           |      |         |
| 8076.9473 | 859792  |                |           |      |         |
| 8076.9630 | 1106595 | 1-40x1-40, b34 | 8076.9949 | -3.9 | -0.0319 |
| 8077.9750 | 5983    |                |           |      |         |
| 8093.9373 | 72006   |                |           |      |         |

|           |        |                |           |        |         |
|-----------|--------|----------------|-----------|--------|---------|
| 8133.0573 | 22323  |                |           |        |         |
| 8134.9473 | 11600  |                |           |        |         |
| 8148.0273 | 12892  |                |           |        |         |
| 8176.0073 | 11647  |                |           |        |         |
| 8177.9973 | 20725  |                |           |        |         |
| 8191.0073 | 122563 |                |           |        |         |
| 8208.0080 | 723106 | 1-40x1-40, b35 | 8208.0354 | -3.3   | -0.0274 |
| 8208.0173 | 589934 |                |           |        |         |
| 8250.0473 | 16419  |                |           |        |         |
| 8261.0373 | 3739   |                |           |        |         |
| 8264.9973 | 13682  |                |           |        |         |
| 8279.0873 | 8679   |                |           |        |         |
| 8290.1073 | 20052  |                |           |        |         |
| 8291.0473 | 18454  |                |           |        |         |
| 8307.0640 | 258064 | 1-40x1-40, b36 | 8307.1038 | -4.8   | -0.0398 |
| 8307.0773 | 237448 |                |           |        |         |
| 8347.0973 | 13745  |                |           |        |         |
| 8364.0850 | 174861 | 1-40x1-40, b37 | 8364.1253 | -4.8   | -0.0403 |
| 8364.1573 | 153663 |                |           |        |         |
| 8393.0973 | 8916   |                |           |        |         |
| 8404.0973 | 70510  |                |           |        |         |
| 8421.1170 | 411115 | 1-40x1-40, b38 | 8421.1467 | -3.5   | -0.0297 |
| 8421.2573 | 411079 |                |           |        |         |
| 8504.1773 | 7732   |                |           |        |         |
| 8519.1273 | 38215  | 1-40x1-40, b39 | 8520.2150 | -127.7 | -1.0877 |
| 8628.2773 | 7526   |                |           |        |         |

**Peak list for Suppl. Fig. 12**A $\beta$ 1-38 $\times$ 1-40/A $\beta$ 1-40 $\times$ 1-38; -H<sub>2</sub>O link

Scan 1528

Charge 5+

m/z 1688.6360

RT 10.44 min

| Experimental [M+H] <sup>+</sup><br>[Da] | Intensity | Fragment label | Theoretical<br>[M+H] <sup>+</sup> [Da] | $\Delta m$<br>[ppm] | $\Delta m$ [Da] |
|-----------------------------------------|-----------|----------------|----------------------------------------|---------------------|-----------------|
| 401.2171                                | 5790      |                |                                        |                     |                 |
| 413.2219                                | 639       |                |                                        |                     |                 |
| 415.2374                                | 2077      |                |                                        |                     |                 |
| 416.2326                                | 1177      |                |                                        |                     |                 |
| 426.2703                                | 664       |                |                                        |                     |                 |
| 430.2506                                | 744       |                |                                        |                     |                 |
| 430.2658                                | 6717      |                |                                        |                     |                 |
| 430.2658                                | 6717      |                |                                        |                     |                 |
| 430.2660                                | 6717      | 1-40, y05      | 430.2666                               | -1.4                | -0.0006         |
| 431.2703                                | 105       |                |                                        |                     |                 |
| 444.2272                                | 6125      |                |                                        |                     |                 |
| 458.2440                                | 2527      |                |                                        |                     |                 |
| 479.2128                                | 887       |                |                                        |                     |                 |
| 486.3114                                | 1730      |                |                                        |                     |                 |
| 514.3073                                | 3666      |                |                                        |                     |                 |
| 515.2658                                | 3646      |                |                                        |                     |                 |
| 525.3412                                | 1576      |                |                                        |                     |                 |
| 533.2755                                | 4211      |                |                                        |                     |                 |
| 533.2755                                | 4994      | 1-38, y06      | 533.2757                               | -0.5                | -0.0003         |
| 533.2756                                | 4591      |                |                                        |                     |                 |
| 534.2788                                | 613       |                |                                        |                     |                 |
| 553.7343                                | 599       |                |                                        |                     |                 |
| 557.3123                                | 1177      |                |                                        |                     |                 |
| 561.3064                                | 10011     | 1-40, y06      | 561.3070                               | -1.1                | -0.0006         |
| 561.3064                                | 6812      |                |                                        |                     |                 |
| 561.3068                                | 9532      |                |                                        |                     |                 |
| 562.3108                                | 894       |                |                                        |                     |                 |
| 563.3489                                | 628       |                |                                        |                     |                 |
| 586.3383                                | 2033      |                |                                        |                     |                 |
| 596.3228                                | 1506      |                |                                        |                     |                 |
| 600.3558                                | 1142      |                |                                        |                     |                 |
| 610.3395                                | 609       |                |                                        |                     |                 |

|          |       |              |          |      |         |
|----------|-------|--------------|----------|------|---------|
| 614.3325 | 9609  |              |          |      |         |
| 614.3325 | 7020  |              |          |      |         |
| 614.3326 | 9669  |              |          |      |         |
| 615.3361 | 475   |              |          |      |         |
| 619.2844 | 2534  | 1-38/40, b05 | 619.2840 | 0.6  | 0.0004  |
| 627.3906 | 1123  |              |          |      |         |
| 646.3590 | 12878 |              |          |      |         |
| 646.3590 | 8007  |              |          |      |         |
| 646.3590 | 13247 | 1-38, y07    | 646.3598 | -1.2 | -0.0008 |
| 653.4346 | 765   |              |          |      |         |
| 656.3792 | 1963  |              |          |      |         |
| 674.3923 | 1198  | 1-40, y07    | 674.3911 | 1.8  | 0.0012  |
| 675.3005 | 716   |              |          |      |         |
| 675.3953 | 763   |              |          |      |         |
| 698.4290 | 701   |              |          |      |         |
| 708.3849 | 663   |              |          |      |         |
| 710.3289 | 652   |              |          |      |         |
| 714.6954 | 711   |              |          |      |         |
| 727.4160 | 3113  |              |          |      |         |
| 731.4122 | 4249  |              |          |      |         |
| 731.4122 | 6683  | 1-40, y08    | 731.4126 | -0.5 | -0.0003 |
| 731.4125 | 6346  |              |          |      |         |
| 741.4293 | 1480  |              |          |      |         |
| 741.7897 | 888   |              |          |      |         |
| 742.4932 | 647   |              |          |      |         |
| 745.4266 | 906   |              |          |      |         |
| 755.4489 | 2819  |              |          |      |         |
| 756.3437 | 5565  | 1-38/40, b06 | 756.3429 | 1.0  | 0.0008  |
| 758.8362 | 439   |              |          |      |         |
| 759.4434 | 3248  | 1-38, y08    | 759.4439 | -0.6 | -0.0005 |
| 767.4783 | 966   |              |          |      |         |
| 772.3314 | 6645  |              |          |      |         |
| 773.3347 | 103   |              |          |      |         |
| 784.4755 | 708   |              |          |      |         |
| 811.8875 | 722   |              |          |      |         |
| 813.4761 | 904   |              |          |      |         |
| 840.4952 | 2681  |              |          |      |         |
| 841.5027 | 152   |              |          |      |         |
| 844.4952 | 12697 | 1-40, y09    | 844.4966 | -1.6 | -0.0014 |
| 871.3684 | 48523 | 1-38/40, b07 | 871.3698 | -1.7 | -0.0014 |
| 871.3687 | 47621 |              |          |      |         |



|           |      |                         |           |      |         |
|-----------|------|-------------------------|-----------|------|---------|
| 872.3721  | 8086 |                         |           |      |         |
| 872.3722  | 778  |                         |           |      |         |
| 880.4530  | 880  |                         |           |      |         |
| 883.5413  | 969  |                         |           |      |         |
| 890.4994  | 796  |                         |           |      |         |
| 898.5183  | 854  |                         |           |      |         |
| 905.3911  | 5567 |                         |           |      |         |
| 905.8917  | 819  |                         |           |      |         |
| 911.5320  | 1719 |                         |           |      |         |
| 939.4107  | 639  |                         |           |      |         |
| 940.5630  | 962  |                         |           |      |         |
| 968.5626  | 1015 |                         |           |      |         |
| 968.9356  | 4031 |                         |           |      |         |
| 968.9358  | 4618 |                         |           |      |         |
| 969.9402  | 1288 |                         |           |      |         |
| 970.9451  | 23   |                         |           |      |         |
| 997.5917  | 1041 |                         |           |      |         |
| 1010.6019 | 2150 |                         |           |      |         |
| 1010.6022 | 2110 |                         |           |      |         |
| 1011.6056 | 416  |                         |           |      |         |
| 1015.5958 | 1751 | 1-38/40, b09; 1-38, y11 | 1015.5974 | -1.6 | -0.0016 |
| 1016.6011 | 435  |                         |           |      |         |
| 1025.9810 | 1342 |                         |           |      |         |
| 1026.4841 | 4027 |                         |           |      |         |
| 1066.5066 | 1169 |                         |           |      |         |
| 1071.8738 | 1515 |                         |           |      |         |
| 1075.0181 | 189  |                         |           |      |         |
| 1085.6399 | 1019 | 1-40, y12               | 1085.6393 | 0.6  | 0.0006  |
| 1099.4695 | 769  |                         |           |      |         |
| 1099.5371 | 877  |                         |           |      |         |
| 1129.6380 | 804  | 1-38, y12               | 1129.6403 | -2.1 | -0.0023 |
| 1133.8234 | 948  |                         |           |      |         |
| 1141.6411 | 5408 |                         |           |      |         |
| 1141.6411 | 5723 |                         |           |      |         |
| 1165.0679 | 1002 |                         |           |      |         |
| 1169.9456 | 737  |                         |           |      |         |
| 1213.7350 | 857  | 1-40, y13               | 1213.7342 | 0.6  | 0.0008  |
| 1214.5728 | 865  |                         |           |      |         |
| 1215.7361 | 1351 |                         |           |      |         |
| 1216.6713 | 2410 | 1-38, y13               | 1216.6724 | -0.9 | -0.0011 |
| 1216.6727 | 2156 |                         |           |      |         |

|           |       |              |           |      |         |
|-----------|-------|--------------|-----------|------|---------|
| 1217.6758 | 529   |              |           |      |         |
| 1222.5860 | 4070  |              |           |      |         |
| 1223.0903 | 909   |              |           |      |         |
| 1240.7091 | 3078  |              |           |      |         |
| 1241.7131 | 30    |              |           |      |         |
| 1243.7102 | 727   |              |           |      |         |
| 1259.8635 | 837   |              |           |      |         |
| 1262.6282 | 1030  |              |           |      |         |
| 1262.9663 | 2041  |              |           |      |         |
| 1263.5956 | 966   |              |           |      |         |
| 1267.6307 | 788   |              |           |      |         |
| 1272.6404 | 873   |              |           |      |         |
| 1273.6957 | 12103 | 1-38, y14    | 1273.6938 | 1.5  | 0.0019  |
| 1274.6985 | 5948  |              |           |      |         |
| 1275.7009 | 1144  |              |           |      |         |
| 1279.5317 | 1114  |              |           |      |         |
| 1281.3057 | 694   |              |           |      |         |
| 1291.5729 | 1163  |              |           |      |         |
| 1294.7018 | 169   |              |           |      |         |
| 1295.6526 | 3680  |              |           |      |         |
| 1297.7300 | 2123  |              |           |      |         |
| 1307.5287 | 21727 |              |           |      |         |
| 1307.5288 | 22631 | 1-38/40, b11 | 1307.5293 | -0.4 | -0.0005 |
| 1328.7782 | 1910  |              |           |      |         |
| 1329.9877 | 1091  |              |           |      |         |
| 1331.1274 | 1120  |              |           |      |         |
| 1333.6682 | 1370  |              |           |      |         |
| 1339.3330 | 8938  |              |           |      |         |
| 1339.3340 | 7168  |              |           |      |         |
| 1349.0671 | 823   |              |           |      |         |
| 1351.8815 | 857   |              |           |      |         |
| 1354.7470 | 2419  |              |           |      |         |
| 1354.7533 | 2915  |              |           |      |         |
| 1356.3894 | 1131  |              |           |      |         |
| 1372.7614 | 34727 | 1-38, y15    | 1372.7622 | -0.6 | -0.0009 |
| 1372.7616 | 31364 |              |           |      |         |
| 1405.0493 | 5356  |              |           |      |         |
| 1405.0496 | 8005  |              |           |      |         |
| 1405.7086 | 2038  |              |           |      |         |
| 1406.5923 | 15546 | 1-38/40, b12 | 1406.5977 | -3.8 | -0.0054 |
| 1412.2570 | 1455  |              |           |      |         |

|           |       |              |           |     |        |
|-----------|-------|--------------|-----------|-----|--------|
| 1412.3530 | 1429  |              |           |     |        |
| 1415.4218 | 1882  |              |           |     |        |
| 1416.1765 | 2141  |              |           |     |        |
| 1464.7072 | 1552  |              |           |     |        |
| 1471.8303 | 12456 |              |           |     |        |
| 1471.8307 | 13479 | 1-40, y16    | 1471.8307 | 0.0 | 0.0000 |
| 1474.7167 | 2937  |              |           |     |        |
| 1476.0653 | 3779  |              |           |     |        |
| 1476.3878 | 5780  |              |           |     |        |
| 1487.7910 | 3542  | 1-38, y16    | 1487.7892 | 1.2 | 0.0018 |
| 1513.7257 | 6466  |              |           |     |        |
| 1515.6616 | 2748  |              |           |     |        |
| 1532.7489 | 4152  |              |           |     |        |
| 1537.9562 | 6258  |              |           |     |        |
| 1543.1558 | 3881  |              |           |     |        |
| 1543.6572 | 33352 |              |           |     |        |
| 1543.6576 | 37501 | 1-38/40, b13 | 1543.6566 | 0.7 | 0.0010 |
| 1544.7578 | 6167  |              |           |     |        |
| 1548.9703 | 4464  |              |           |     |        |
| 1550.7612 | 11771 |              |           |     |        |
| 1557.7584 | 6587  |              |           |     |        |
| 1559.1721 | 5418  |              |           |     |        |
| 1559.7622 | 10444 |              |           |     |        |
| 1561.3635 | 4237  |              |           |     |        |
| 1562.5076 | 10120 |              |           |     |        |
| 1563.7614 | 6013  |              |           |     |        |
| 1570.9015 | 31802 | 1-40, y17    | 1570.8991 | 1.5 | 0.0024 |
| 1571.7810 | 9794  |              |           |     |        |
| 1573.5662 | 7465  |              |           |     |        |
| 1573.7773 | 7756  |              |           |     |        |
| 1578.7808 | 10389 |              |           |     |        |
| 1578.9757 | 3928  |              |           |     |        |
| 1587.7841 | 11318 |              |           |     |        |
| 1588.9948 | 6570  |              |           |     |        |
| 1589.3801 | 7561  |              |           |     |        |
| 1593.7722 | 5346  |              |           |     |        |
| 1594.3927 | 19617 |              |           |     |        |
| 1596.7817 | 21945 |              |           |     |        |
| 1597.5924 | 5072  |              |           |     |        |
| 1604.8001 | 8959  |              |           |     |        |
| 1607.1859 | 5645  |              |           |     |        |

|           |       |              |           |      |         |
|-----------|-------|--------------|-----------|------|---------|
| 1608.0055 | 7144  |              |           |      |         |
| 1608.5968 | 7771  |              |           |      |         |
| 1613.4045 | 5228  |              |           |      |         |
| 1618.6096 | 14340 |              |           |      |         |
| 1625.3888 | 6094  |              |           |      |         |
| 1625.6084 | 9734  |              |           |      |         |
| 1626.0116 | 14482 |              |           |      |         |
| 1631.6044 | 10252 |              |           |      |         |
| 1631.8084 | 11628 |              |           |      |         |
| 1636.4150 | 9621  |              |           |      |         |
| 1636.8146 | 7763  |              |           |      |         |
| 1638.0134 | 8446  |              |           |      |         |
| 1641.4128 | 6090  |              |           |      |         |
| 1652.7195 | 5070  |              |           |      |         |
| 1652.7208 | 1599  |              |           |      |         |
| 1652.7208 | 1970  |              |           |      |         |
| 1653.0559 | 6728  |              |           |      |         |
| 1654.2219 | 6880  |              |           |      |         |
| 1654.8217 | 7047  |              |           |      |         |
| 1658.2267 | 8553  |              |           |      |         |
| 1660.8195 | 12843 |              |           |      |         |
| 1664.6289 | 14754 |              |           |      |         |
| 1676.2490 | 6705  |              |           |      |         |
| 1676.8430 | 12663 |              |           |      |         |
| 1677.0343 | 11644 |              |           |      |         |
| 1680.7125 | 6824  |              |           |      |         |
| 1680.7125 | 3429  |              |           |      |         |
| 1680.7125 | 12101 | 1-38/40, b14 | 1680.7155 | -1.8 | -0.0030 |
| 1681.7156 | 2919  |              |           |      |         |
| 1682.8208 | 10032 |              |           |      |         |
| 1685.8298 | 54697 |              |           |      |         |
| 1690.6394 | 75159 |              |           |      |         |
| 1698.7526 | 1273  |              |           |      |         |
| 1739.8369 | 12830 |              |           |      |         |
| 1743.5923 | 8389  |              |           |      |         |
| 1792.8643 | 8760  |              |           |      |         |
| 1806.8816 | 9497  |              |           |      |         |
| 1807.6244 | 7806  |              |           |      |         |
| 1808.1110 | 10271 |              |           |      |         |
| 1808.7656 | 6510  |              |           |      |         |
| 1808.7656 | 3310  |              |           |      |         |

|           |       |              |           |      |         |
|-----------|-------|--------------|-----------|------|---------|
| 1808.7714 | 12014 | 1-38/40, b15 | 1808.7741 | -1.5 | -0.0027 |
| 1838.8734 | 5781  |              |           |      |         |
| 1839.8744 | 11911 |              |           |      |         |
| 1866.9286 | 10624 |              |           |      |         |
| 1899.1708 | 8557  |              |           |      |         |
| 1936.8638 | 18665 | 1-38/40, b16 | 1936.8690 | -2.7 | -0.0052 |
| 1936.8638 | 10605 |              |           |      |         |
| 1936.8638 | 4257  |              |           |      |         |
| 1937.9564 | 9241  |              |           |      |         |
| 1944.4387 | 6603  |              |           |      |         |
| 1949.9508 | 13597 |              |           |      |         |
| 1973.4645 | 11328 |              |           |      |         |
| 1983.0034 | 7996  |              |           |      |         |
| 2008.0088 | 10784 |              |           |      |         |
| 2020.5075 | 10496 |              |           |      |         |
| 2031.9441 | 6762  |              |           |      |         |
| 2081.0590 | 1557  | 1-38, y21    | 2081.0741 | -7.3 | -0.0151 |
| 2106.5444 | 169   |              |           |      |         |
| 2113.3360 | 2361  |              |           |      |         |
| 2113.5186 | 6590  |              |           |      |         |
| 2115.0227 | 843   |              |           |      |         |
| 2130.7498 | 2981  |              |           |      |         |
| 2149.0137 | 11402 | 1-38/40, b18 | 2149.0215 | -3.6 | -0.0078 |
| 2149.0289 | 5778  |              |           |      |         |
| 2149.0289 | 2369  |              |           |      |         |
| 2167.7720 | 3412  |              |           |      |         |
| 2169.1084 | 2277  |              |           |      |         |
| 2194.1702 | 2217  | 1-38, y22    | 2194.1582 | 5.5  | 0.0120  |
| 2211.1280 | 5659  |              |           |      |         |
| 2211.4814 | 3244  |              |           |      |         |
| 2211.8022 | 2583  |              |           |      |         |
| 2212.1064 | 4014  |              |           |      |         |
| 2214.0918 | 373   |              |           |      |         |
| 2214.5864 | 2691  |              |           |      |         |
| 2215.0686 | 1900  |              |           |      |         |
| 2254.8213 | 3019  |              |           |      |         |
| 2280.1304 | 2518  |              |           |      |         |
| 2290.1133 | 3155  |              |           |      |         |
| 2290.7656 | 1407  |              |           |      |         |
| 2291.0990 | 2585  |              |           |      |         |
| 2296.0874 | 1967  | 1-38/40, b19 | 2296.0899 | -1.1 | -0.0025 |

|           |       |                |             |        |         |
|-----------|-------|----------------|-------------|--------|---------|
| 2299.8503 | 2084  |                |             |        |         |
| 2300.1787 | 6503  |                |             |        |         |
| 2300.5037 | 4124  |                |             |        |         |
| 2356.4760 | 2782  |                |             |        |         |
| 2491.1995 | 1270  |                |             |        |         |
| 2492.6836 | 1291  |                |             |        |         |
| 2588.3920 | 1322  |                |             |        |         |
| 3259.6573 | 8950  | 1-38, y31      | 3259.6574   | 0.0    | -0.0001 |
| 3477.1960 | 17434 |                |             |        |         |
| 3613.7249 | 11465 |                |             |        |         |
| 3677.2585 | 8324  |                |             |        |         |
| 3732.7947 | 10629 |                |             |        |         |
| 3784.8909 | 16053 |                |             |        |         |
| 3787.8585 | 5505  |                |             |        |         |
| 3882.9036 | 16358 |                |             |        |         |
| 3955.9402 | 13033 |                |             |        |         |
| 4014.9834 | 11149 | 1-38, y37      | 4014.9925   | -2.3   | -0.0091 |
| 4014.9909 | 4948  |                |             |        |         |
| 4038.9900 | 35708 |                |             |        |         |
| 4039.4834 | 23338 |                |             |        |         |
| 4054.9840 | 17248 |                |             |        |         |
| 4056.4788 | 8583  |                |             |        |         |
| 4104.5060 | 15061 |                |             |        |         |
| 4105.0205 | 27565 |                |             |        |         |
| 4113.0254 | 7611  |                |             |        |         |
| 4213.0670 | 3842  | 1-40, y39      | 4213.1293   | -14.8  | -0.0623 |
| 4214.1260 | 3164  |                |             |        |         |
| 4215.1390 | 3916  |                |             |        |         |
| 4227.0156 | 5978  | 1-38x1-40, b01 | 4227.0358   | -4.8   | -0.0202 |
| 4228.0303 | 23299 |                |             |        |         |
| 4228.0303 | 14966 |                |             |        |         |
| 4425.1772 | 24162 | 1-40x1-38, b01 | 4425.1726   | 1.0    | 0.0046  |
| 4425.2105 | 22430 |                |             |        |         |
| 5180.4907 | 33198 | 1-40x1-38, b07 | 5180.5077   | -3.3   | -0.0170 |
| 5180.5052 | 19253 |                |             |        |         |
| 5919.7890 | 2964  | 1-38x1-40, b15 | 5919.7751   | 2.3    | 0.0139  |
| 6261.0072 | 8529  | 1-38x1-40, b18 | 6260.022555 | 157.3  | 0.9846  |
| 6290.1343 | 4401  |                |             |        |         |
| 6391.2020 | 4078  |                |             |        |         |
| 6604.2176 | 9034  | 1-40x1-38, b19 | 6605.2276   | -152.9 | -1.0101 |
| 6622.1784 | 4137  |                |             |        |         |

|           |       |                |           |        |         |
|-----------|-------|----------------|-----------|--------|---------|
| 6758.4670 | 4980  |                |           |        |         |
| 6869.2410 | 28661 | 1-38x1-40, b23 | 6869.2660 | -3.6   | -0.0250 |
| 6869.2556 | 23304 |                |           |        |         |
| 6952.3465 | 13104 | 1-40x1-38, b22 | 6952.3759 | -4.2   | -0.0294 |
| 6968.3172 | 10084 | 1-38x1-40, b24 | 6968.3344 | -2.5   | -0.0172 |
| 6970.3237 | 10016 |                |           |        |         |
| 7067.3814 | 26423 |                |           |        |         |
| 7067.3930 | 38284 | 1-40x1-38, b23 | 7067.4029 | -1.4   | -0.0099 |
| 7166.4560 | 11643 | 1-40x1-38, b24 | 7166.4713 | -2.1   | -0.0152 |
| 7167.4470 | 13983 |                |           |        |         |
| 7482.5684 | 5908  | 1-38x1-40, b30 | 7482.5844 | -2.1   | -0.0160 |
| 7482.5991 | 5265  |                |           |        |         |
| 7567.6940 | 9554  |                |           |        |         |
| 7578.6665 | 6512  |                |           |        |         |
| 7595.6734 | 18794 | 1-38x1-40, b31 | 7595.6685 | 0.6    | 0.0049  |
| 7596.6680 | 20874 |                |           |        |         |
| 7680.7594 | 7872  | 1-40x1-38, b30 | 7680.7212 | 5.0    | 0.0382  |
| 7690.7470 | 6928  |                |           |        |         |
| 7707.7440 | 4121  |                |           |        |         |
| 7708.7374 | 29353 |                |           |        |         |
| 7708.7393 | 34743 | 1-38x1-40, b32 | 7708.7525 | -1.7   | -0.0132 |
| 7793.8100 | 21395 |                |           |        |         |
| 7793.8717 | 23867 | 1-40x1-38, b31 | 7793.8053 | 8.5    | 0.0664  |
| 7878.8296 | 38252 |                |           |        |         |
| 7878.8485 | 55769 | 1-38x1-40, b34 | 7878.8581 | -1.2   | -0.0096 |
| 7878.8500 | 28990 |                |           |        |         |
| 7905.8680 | 9810  |                |           |        |         |
| 7906.8547 | 33826 | 1-40x1-38, b32 | 7906.8894 | -4.4   | -0.0347 |
| 7906.8877 | 17217 |                |           |        |         |
| 7908.8760 | 10201 |                |           |        |         |
| 7962.8960 | 11936 | 1-40x1-38, b33 | 7963.9107 | -127.4 | -1.0147 |
| 7992.8973 | 10684 |                |           |        |         |
| 8009.8926 | 69034 | 1-38x1-40, b35 | 8009.8985 | -0.7   | -0.0059 |
| 8009.9174 | 40548 |                |           |        |         |
| 8010.8825 | 15360 |                |           |        |         |
| 8062.9936 | 5311  |                |           |        |         |
| 8076.9676 | 69030 | 1-40x1-38, b34 | 8076.9949 | -3.4   | -0.0273 |
| 8076.9746 | 56331 |                |           |        |         |
| 8092.9637 | 15701 |                |           |        |         |
| 8108.9891 | 53611 | 1-38x1-40, b36 | 8108.9670 | 2.7    | 0.0221  |
| 8109.9556 | 53903 |                |           |        |         |

|           |        |                |           |      |         |
|-----------|--------|----------------|-----------|------|---------|
| 8109.9579 | 7282   |                |           |      |         |
| 8132.0331 | 6704   |                |           |      |         |
| 8148.0134 | 5692   |                |           |      |         |
| 8165.9880 | 27739  | 1-38x1-40, b37 | 8165.9884 | -0.1 | -0.0004 |
| 8191.0130 | 24590  |                |           |      |         |
| 8207.9747 | 104812 | 1-40x1-38, b35 | 8208.0354 | -7.4 | -0.0607 |
| 8208.0250 | 102614 |                |           |      |         |
| 8221.9950 | 8830   |                |           |      |         |
| 8223.0114 | 78681  | 1-38x1-40, b38 | 8223.0099 | 0.2  | 0.0015  |
| 8279.0312 | 7281   |                |           |      |         |
| 8293.0900 | 28169  |                |           |      |         |
| 8307.0900 | 120935 | 1-40x1-38, b36 | 8307.1038 | -1.7 | -0.0138 |
| 8307.1123 | 110903 |                |           |      |         |
| 8322.0660 | 126000 | 1-38x1-40, b39 | 8322.0783 | -1.5 | -0.0123 |
| 8323.0815 | 117138 |                |           |      |         |
| 8364.0764 | 37206  | 1-40x1-38, b37 | 8364.1253 | -5.8 | -0.0489 |
| 8403.1077 | 9845   |                |           |      |         |
| 8422.1177 | 70423  |                |           |      |         |
| 8423.1090 | 45286  |                |           |      |         |
| 8439.1480 | 464355 | 1-38x1-40 M    | 8439.1567 | -1.0 | -0.0087 |
| 8439.2204 | 464333 |                |           |      |         |



**Peak list for Suppl. Fig. 13**

Aβ1-42×1-42; -H<sub>2</sub>O link; -NH<sub>3</sub> link; merged scans

Scans 1625-1654

Charge 6+

Selected m/z 1502.76

RT 9.83-9.98 min

| Experimental [M+H] <sup>+</sup> [Da] | Intensity | Fragment label | Theoretical [M+H] <sup>+</sup> ; -H <sub>2</sub> O link [Da] | Δm; -H <sub>2</sub> O link [ppm] | Δm; -H <sub>2</sub> O link [Da] | Theoretical [M+H] <sup>+</sup> ; -NH <sub>3</sub> link [Da] | Δm; -NH <sub>3</sub> link [ppm] | Δm; -NH <sub>3</sub> link [Da] |
|--------------------------------------|-----------|----------------|--------------------------------------------------------------|----------------------------------|---------------------------------|-------------------------------------------------------------|---------------------------------|--------------------------------|
| 401.22168                            | 217       |                |                                                              |                                  |                                 |                                                             |                                 |                                |
| 409.20697                            | 368       |                |                                                              |                                  |                                 |                                                             |                                 |                                |
| 412.2556                             | 733       |                |                                                              |                                  |                                 |                                                             |                                 |                                |
| 416.2328                             | 210       |                |                                                              |                                  |                                 |                                                             |                                 |                                |
| 426.27118                            | 2564      |                |                                                              |                                  |                                 |                                                             |                                 |                                |
| 427.21753                            | 294       |                |                                                              |                                  |                                 |                                                             |                                 |                                |
| 443.19147                            | 75        |                |                                                              |                                  |                                 |                                                             |                                 |                                |
| 444.22766                            | 310       |                |                                                              |                                  |                                 |                                                             |                                 |                                |
| 461.20203                            | 175       |                |                                                              |                                  |                                 |                                                             |                                 |                                |
| 475.21613                            | 75        |                |                                                              |                                  |                                 |                                                             |                                 |                                |
| 497.3449                             | 52        |                |                                                              |                                  |                                 |                                                             |                                 |                                |
| 501.2541                             | 111       |                |                                                              |                                  |                                 |                                                             |                                 |                                |
| 514.3059                             | 89        |                |                                                              |                                  |                                 |                                                             |                                 |                                |
| 515.2644                             | 241       |                |                                                              |                                  |                                 |                                                             |                                 |                                |
| 515.31934                            | 260       | y06            | 515.3193                                                     | 0.0                              | 0.0000                          | 515.3193                                                    | 0.0                             | 0.0000                         |
| 517.2279                             | 267       |                |                                                              |                                  |                                 |                                                             |                                 |                                |
| 525.33997                            | 307       |                |                                                              |                                  |                                 |                                                             |                                 |                                |
| 535.23926                            | 77        |                |                                                              |                                  |                                 |                                                             |                                 |                                |
| 539.27075                            | 83        |                |                                                              |                                  |                                 |                                                             |                                 |                                |
| 543.29626                            | 404       |                |                                                              |                                  |                                 |                                                             |                                 |                                |
| 557.3113                             | 77        |                |                                                              |                                  |                                 |                                                             |                                 |                                |
| 591.2639                             | 62        |                |                                                              |                                  |                                 |                                                             |                                 |                                |
| 614.3328                             | 1085      |                |                                                              |                                  |                                 |                                                             |                                 |                                |
| 614.387                              | 672       | y07            | 614.3877                                                     | -1.2                             | 0.0007                          | 614.3877                                                    | -1.2                            | -0.0007                        |
| 653.43536                            | 54        |                |                                                              |                                  |                                 |                                                             |                                 |                                |
| 654.2213                             | 54        |                |                                                              |                                  |                                 |                                                             |                                 |                                |
| 656.3805                             | 242       |                |                                                              |                                  |                                 |                                                             |                                 |                                |
| 699.4219                             | 88        |                |                                                              |                                  |                                 |                                                             |                                 |                                |
| 703.8002                             | 80        |                |                                                              |                                  |                                 |                                                             |                                 |                                |
| 713.40076                            | 1189      |                |                                                              |                                  |                                 |                                                             |                                 |                                |

|           |      |     |           |      |        |           |      |         |
|-----------|------|-----|-----------|------|--------|-----------|------|---------|
| 727.41547 | 472  |     |           |      |        |           |      |         |
| 745.427   | 422  | y08 | 745.4282  | -1.6 | 0.0012 | 745.4282  | -1.6 | -0.0012 |
| 756.3423  | 533  | b06 | 756.3429  | -0.8 | 0.0006 | 756.3429  | -0.8 | -0.0006 |
| 766.03436 | 54   |     |           |      |        |           |      |         |
| 771.9649  | 84   |     |           |      |        |           |      |         |
| 815.3909  | 93   |     |           |      |        |           |      |         |
| 826.48474 | 1195 |     |           |      |        |           |      |         |
| 833.39386 | 56   |     |           |      |        |           |      |         |
| 839.40405 | 75   |     |           |      |        |           |      |         |
| 840.49805 | 58   |     |           |      |        |           |      |         |
| 856.84607 | 78   |     |           |      |        |           |      |         |
| 871.3688  | 2234 | b07 | 871.3698  | -1.2 | 0.0010 | 871.3698  | -1.2 | -0.0010 |
| 882.08435 | 65   |     |           |      |        |           |      |         |
| 882.7511  | 57   |     |           |      |        |           |      |         |
| 888.4072  | 84   |     |           |      |        |           |      |         |
| 911.529   | 65   |     |           |      |        |           |      |         |
| 915.5321  | 476  | y10 | 915.5337  | -1.8 | 0.0016 | 915.5337  | -1.8 | -0.0016 |
| 921.0947  | 96   |     |           |      |        |           |      |         |
| 933.4306  | 66   |     |           |      |        |           |      |         |
| 939.567   | 256  |     |           |      |        |           |      |         |
| 952.4466  | 67   |     |           |      |        |           |      |         |
| 974.16724 | 107  |     |           |      |        |           |      |         |
| 974.23474 | 136  |     |           |      |        |           |      |         |
| 997.5139  | 159  |     |           |      |        |           |      |         |
| 1027.3125 | 66   |     |           |      |        |           |      |         |
| 1028.6177 | 367  | y11 | 1028.6178 | -0.1 | 0.0001 | 1028.6178 | -0.1 | -0.0001 |
| 1034.1428 | 71   |     |           |      |        |           |      |         |
| 1055.9563 | 65   |     |           |      |        |           |      |         |
| 1075.5112 | 219  |     |           |      |        |           |      |         |
| 1104.3081 | 87   |     |           |      |        |           |      |         |
| 1106.9136 | 77   |     |           |      |        |           |      |         |
| 1119.5195 | 117  |     |           |      |        |           |      |         |
| 1152.0371 | 81   |     |           |      |        |           |      |         |
| 1153.2174 | 73   |     |           |      |        |           |      |         |
| 1162.9305 | 92   |     |           |      |        |           |      |         |
| 1189.7122 | 81   |     |           |      |        |           |      |         |
| 1206.5905 | 130  |     |           |      |        |           |      |         |

|           |      |  |  |  |  |  |  |  |
|-----------|------|--|--|--|--|--|--|--|
| 1211.9854 | 101  |  |  |  |  |  |  |  |
| 1213.5125 | 150  |  |  |  |  |  |  |  |
| 1218.6011 | 98   |  |  |  |  |  |  |  |
| 1226.5642 | 118  |  |  |  |  |  |  |  |
| 1235.7628 | 104  |  |  |  |  |  |  |  |
| 1236.198  | 129  |  |  |  |  |  |  |  |
| 1250.6106 | 108  |  |  |  |  |  |  |  |
| 1257.0754 | 168  |  |  |  |  |  |  |  |
| 1258.6068 | 162  |  |  |  |  |  |  |  |
| 1259.3892 | 176  |  |  |  |  |  |  |  |
| 1294.6296 | 156  |  |  |  |  |  |  |  |
| 1325.8209 | 363  |  |  |  |  |  |  |  |
| 1403.686  | 769  |  |  |  |  |  |  |  |
| 1451.7029 | 675  |  |  |  |  |  |  |  |
| 1452.0903 | 668  |  |  |  |  |  |  |  |
| 1467.9022 | 453  |  |  |  |  |  |  |  |
| 1468.9053 | 875  |  |  |  |  |  |  |  |
| 1575.1719 | 615  |  |  |  |  |  |  |  |
| 1596.182  | 966  |  |  |  |  |  |  |  |
| 1597.185  | 1088 |  |  |  |  |  |  |  |
| 1620.6035 | 1702 |  |  |  |  |  |  |  |
| 1650.6184 | 931  |  |  |  |  |  |  |  |
| 1653.4207 | 650  |  |  |  |  |  |  |  |
| 1653.625  | 1512 |  |  |  |  |  |  |  |
| 1653.8254 | 3732 |  |  |  |  |  |  |  |
| 1699.834  | 1409 |  |  |  |  |  |  |  |
| 1700.0488 | 879  |  |  |  |  |  |  |  |
| 1700.4502 | 1529 |  |  |  |  |  |  |  |
| 1741.4636 | 569  |  |  |  |  |  |  |  |
| 1742.4667 | 1020 |  |  |  |  |  |  |  |
| 1762.283  | 304  |  |  |  |  |  |  |  |
| 1762.677  | 394  |  |  |  |  |  |  |  |
| 1787.8678 | 197  |  |  |  |  |  |  |  |
| 1790.8718 | 421  |  |  |  |  |  |  |  |
| 1792.8665 | 147  |  |  |  |  |  |  |  |
| 1808.7681 | 260  |  |  |  |  |  |  |  |
| 1816.1619 | 115  |  |  |  |  |  |  |  |
| 1831.3688 | 116  |  |  |  |  |  |  |  |
| 1832.3859 | 120  |  |  |  |  |  |  |  |
| 1833.8851 | 299  |  |  |  |  |  |  |  |
| 1835.1454 | 110  |  |  |  |  |  |  |  |

|           |     |  |  |  |  |  |  |  |
|-----------|-----|--|--|--|--|--|--|--|
| 1835.9851 | 140 |  |  |  |  |  |  |  |
| 1841.1774 | 129 |  |  |  |  |  |  |  |
| 1849.1334 | 141 |  |  |  |  |  |  |  |
| 1849.4769 | 111 |  |  |  |  |  |  |  |
| 1857.8912 | 163 |  |  |  |  |  |  |  |
| 1873.1888 | 144 |  |  |  |  |  |  |  |
| 1875.6315 | 119 |  |  |  |  |  |  |  |
| 1886.9094 | 104 |  |  |  |  |  |  |  |
| 1889.4128 | 209 |  |  |  |  |  |  |  |
| 1899.1627 | 120 |  |  |  |  |  |  |  |
| 1905.1677 | 237 |  |  |  |  |  |  |  |
| 1906.903  | 136 |  |  |  |  |  |  |  |
| 1913.9128 | 135 |  |  |  |  |  |  |  |
| 1936.8646 | 194 |  |  |  |  |  |  |  |
| 1940.9681 | 154 |  |  |  |  |  |  |  |
| 1947.8514 | 150 |  |  |  |  |  |  |  |
| 1952.4751 | 141 |  |  |  |  |  |  |  |
| 1958.7046 | 118 |  |  |  |  |  |  |  |
| 1991.2263 | 341 |  |  |  |  |  |  |  |
| 1991.46   | 220 |  |  |  |  |  |  |  |
| 1995.9694 | 171 |  |  |  |  |  |  |  |
| 2019.4701 | 123 |  |  |  |  |  |  |  |
| 2023.9938 | 125 |  |  |  |  |  |  |  |
| 2025.9855 | 253 |  |  |  |  |  |  |  |
| 2029.1266 | 174 |  |  |  |  |  |  |  |
| 2038.4904 | 140 |  |  |  |  |  |  |  |
| 2049.0012 | 75  |  |  |  |  |  |  |  |
| 2049.9868 | 257 |  |  |  |  |  |  |  |
| 2051.0098 | 65  |  |  |  |  |  |  |  |
| 2052.4963 | 114 |  |  |  |  |  |  |  |
| 2053.2532 | 69  |  |  |  |  |  |  |  |
| 2060.167  | 96  |  |  |  |  |  |  |  |
| 2063.7017 | 65  |  |  |  |  |  |  |  |
| 2065.7705 | 70  |  |  |  |  |  |  |  |
| 2073.2822 | 67  |  |  |  |  |  |  |  |
| 2073.7537 | 1   |  |  |  |  |  |  |  |
| 2092.254  | 166 |  |  |  |  |  |  |  |
| 2097.033  | 64  |  |  |  |  |  |  |  |
| 2097.2666 | 213 |  |  |  |  |  |  |  |
| 2099.037  | 79  |  |  |  |  |  |  |  |
| 2099.2747 | 83  |  |  |  |  |  |  |  |

|           |      |  |  |  |  |  |  |  |
|-----------|------|--|--|--|--|--|--|--|
| 2100.0173 | 67   |  |  |  |  |  |  |  |
| 2104.3875 | 58   |  |  |  |  |  |  |  |
| 2111.9883 | 73   |  |  |  |  |  |  |  |
| 2121.789  | 155  |  |  |  |  |  |  |  |
| 2163.3833 | 63   |  |  |  |  |  |  |  |
| 2176.0708 | 58   |  |  |  |  |  |  |  |
| 2227.2056 | 111  |  |  |  |  |  |  |  |
| 2247.1042 | 63   |  |  |  |  |  |  |  |
| 2256.1223 | 192  |  |  |  |  |  |  |  |
| 2257.1436 | 2    |  |  |  |  |  |  |  |
| 2259.0044 | 62   |  |  |  |  |  |  |  |
| 2260.149  | 89   |  |  |  |  |  |  |  |
| 2274.2932 | 72   |  |  |  |  |  |  |  |
| 2296.0808 | 214  |  |  |  |  |  |  |  |
| 2305.1396 | 69   |  |  |  |  |  |  |  |
| 2346.417  | 61   |  |  |  |  |  |  |  |
| 2357.896  | 156  |  |  |  |  |  |  |  |
| 2424.9673 | 57   |  |  |  |  |  |  |  |
| 2443.1792 | 75   |  |  |  |  |  |  |  |
| 2457.515  | 69   |  |  |  |  |  |  |  |
| 2460.1426 | 117  |  |  |  |  |  |  |  |
| 2474.6914 | 66   |  |  |  |  |  |  |  |
| 2556.4756 | 56   |  |  |  |  |  |  |  |
| 2568.598  | 323  |  |  |  |  |  |  |  |
| 2582.2405 | 354  |  |  |  |  |  |  |  |
| 2629.1218 | 66   |  |  |  |  |  |  |  |
| 2630.6675 | 62   |  |  |  |  |  |  |  |
| 2691.9014 | 98   |  |  |  |  |  |  |  |
| 2697.314  | 862  |  |  |  |  |  |  |  |
| 2698.659  | 628  |  |  |  |  |  |  |  |
| 2768.162  | 62   |  |  |  |  |  |  |  |
| 2780.3525 | 188  |  |  |  |  |  |  |  |
| 2790.4434 | 55   |  |  |  |  |  |  |  |
| 2831.7256 | 1030 |  |  |  |  |  |  |  |
| 2839.1997 | 64   |  |  |  |  |  |  |  |
| 2857.331  | 309  |  |  |  |  |  |  |  |
| 2914.341  | 180  |  |  |  |  |  |  |  |
| 2957.4478 | 2186 |  |  |  |  |  |  |  |
| 3005.1528 | 3848 |  |  |  |  |  |  |  |
| 3005.8228 | 1508 |  |  |  |  |  |  |  |
| 3892.8787 | 217  |  |  |  |  |  |  |  |

|           |       |                   |           |       |        |           |        |         |
|-----------|-------|-------------------|-----------|-------|--------|-----------|--------|---------|
| 3996.938  | 759   |                   |           |       |        |           |        |         |
| 4197.0693 | 3686  |                   |           |       |        |           |        |         |
| 4197.556  | 2156  |                   |           |       |        |           |        |         |
| 4501.2114 | 2754  |                   |           |       |        |           |        |         |
| 4506.2495 | 2218  |                   |           |       |        |           |        |         |
| 4512.2705 | 289   |                   |           |       |        |           |        |         |
| 7864.806  | 1873  | 1-42x1-42,<br>b30 | 7864.8424 | -4.6  | 0.0364 | 7865.8264 | -129.7 | -1.0204 |
| 7980.8984 | 3637  |                   |           |       |        |           |        |         |
| 8090.9766 | 5300  | 1-42x1-42,<br>b32 | 8091.0105 | -4.2  | 0.0339 | 8091.9946 | -125.8 | -1.0180 |
| 8096.963  | 2001  |                   |           |       |        |           |        |         |
| 8149.003  | 3664  | 1-42x1-42,<br>b33 | 8148.0319 | 119.2 | 0.9711 | 8149.0159 | -1.6   | -0.0129 |
| 8149.9893 | 3882  |                   |           |       |        |           |        |         |
| 8262.084  | 9441  | 1-42x1-42,<br>b34 | 8261.1159 | 117.2 | 0.9681 | 8262.1000 | -1.9   | -0.0160 |
| 8263.079  | 9125  |                   |           |       |        |           |        |         |
| 8292.024  | 159   |                   |           |       |        |           |        |         |
| 8393.121  | 14231 | 1-42x1-42,<br>b35 | 8392.1564 | 114.9 | 0.9646 | 8393.1405 | -2.3   | -0.0195 |
| 8550.216  | 2516  | 1-42x1-42,<br>b37 | 8548.2460 | 230.4 | 1.9700 | 8549.2300 | 115.3  | 0.9860  |
| 8606.222  | 4916  |                   |           |       |        |           |        |         |
| 8607.237  | 9867  | 1-42x1-42,<br>b38 | 8605.2674 | 228.8 | 1.9696 | 8606.2515 | 114.5  | 0.9855  |
| 8705.296  | 3128  | 1-42x1-42,<br>b39 | 8704.3362 | 110.3 | 0.9598 | 8705.3202 | -2.8   | -0.0242 |
| 8706.292  | 1727  |                   |           |       |        |           |        |         |
| 8995.456  | 2283  |                   |           |       |        |           |        |         |
| 9006.492  | 13212 | 1-42x1-42<br>M    | 9005.5358 | 106.2 | 0.9562 | 9006.5198 | -3.1   | -0.0278 |

**Peak list for Suppl. Fig. 14**A $\beta$ 1-42 $\times$ 1-42; DiY-link

Scan 2184

Charge 6+

m/z 1504.4309

RT 10.75 min

| Experimental<br>[M+H] <sup>+</sup> [Da] | Intensity | Fragment label | Theoretical<br>[M+H] <sup>+</sup> [Da] | $\Delta m$<br>[ppm] | $\Delta m$ [Da] |
|-----------------------------------------|-----------|----------------|----------------------------------------|---------------------|-----------------|
| 401.2170                                | 8049      |                |                                        |                     |                 |
| 401.2740                                | 24738     |                |                                        |                     |                 |
| 401.2741                                | 25652     |                |                                        |                     |                 |
| 401.2741                                | 23037     |                |                                        |                     |                 |
| 410.3726                                | 949       |                |                                        |                     |                 |
| 412.2536                                | 52805     |                |                                        |                     |                 |
| 412.2538                                | 53061     |                |                                        |                     |                 |
| 412.2538                                | 45226     |                |                                        |                     |                 |
| 416.2300                                | 14300     |                |                                        |                     |                 |
| 426.2691                                | 126794    |                |                                        |                     |                 |
| 426.2691                                | 164579    |                |                                        |                     |                 |
| 426.2692                                | 164579    |                |                                        |                     |                 |
| 427.2729                                | 11879     |                |                                        |                     |                 |
| 427.2730                                | 4944      |                |                                        |                     |                 |
| 430.2467                                | 1075      |                |                                        |                     |                 |
| 444.2257                                | 19183     |                |                                        |                     |                 |
| 444.2257                                | 23851     |                |                                        |                     |                 |
| 444.2258                                | 23327     |                |                                        |                     |                 |
| 445.5736                                | 906       |                |                                        |                     |                 |
| 450.4605                                | 1092      |                |                                        |                     |                 |
| 458.2408                                | 6747      |                |                                        |                     |                 |
| 458.2953                                | 31503     |                |                                        |                     |                 |
| 458.2954                                | 32034     |                |                                        |                     |                 |
| 458.9346                                | 1005      |                |                                        |                     |                 |
| 461.0951                                | 1308      |                |                                        |                     |                 |
| 467.2947                                | 891       |                |                                        |                     |                 |
| 469.3104                                | 1712      |                |                                        |                     |                 |
| 497.3058                                | 8508      |                |                                        |                     |                 |
| 497.3426                                | 3474      |                |                                        |                     |                 |
| 498.3466                                | 750       |                |                                        |                     |                 |
| 514.3035                                | 2817      |                |                                        |                     |                 |
| 515.0082                                | 1650      |                |                                        |                     |                 |

|          |        |  |  |  |
|----------|--------|--|--|--|
| 515.2632 | 17607  |  |  |  |
| 515.2634 | 12591  |  |  |  |
| 515.2634 | 17970  |  |  |  |
| 515.3167 | 240888 |  |  |  |
| 515.3168 | 142782 |  |  |  |
| 515.3168 | 242666 |  |  |  |
| 515.6317 | 1173   |  |  |  |
| 516.2655 | 340    |  |  |  |
| 518.3237 | 1337   |  |  |  |
| 523.2971 | 1031   |  |  |  |
| 525.3375 | 37064  |  |  |  |
| 525.3375 | 23937  |  |  |  |
| 525.3375 | 36595  |  |  |  |
| 526.3417 | 94     |  |  |  |
| 543.2937 | 40419  |  |  |  |
| 543.2937 | 25754  |  |  |  |
| 543.2937 | 40915  |  |  |  |
| 544.2966 | 365    |  |  |  |
| 555.5493 | 1125   |  |  |  |
| 557.3093 | 8948   |  |  |  |
| 571.3247 | 1956   |  |  |  |
| 574.9724 | 1153   |  |  |  |
| 586.3355 | 12981  |  |  |  |
| 586.3355 | 21805  |  |  |  |
| 586.3357 | 21630  |  |  |  |
| 587.3391 | 285    |  |  |  |
| 596.3187 | 3985   |  |  |  |
| 596.3744 | 3593   |  |  |  |
| 614.3306 | 36592  |  |  |  |
| 614.3306 | 19775  |  |  |  |
| 614.3307 | 36567  |  |  |  |
| 614.3846 | 148828 |  |  |  |
| 614.3846 | 70354  |  |  |  |
| 614.3846 | 149238 |  |  |  |
| 615.3878 | 180    |  |  |  |
| 628.3447 | 12714  |  |  |  |
| 628.3831 | 3816   |  |  |  |
| 656.3765 | 17727  |  |  |  |
| 656.3765 | 37603  |  |  |  |
| 656.3768 | 37202  |  |  |  |
| 657.3804 | 1837   |  |  |  |



|          |        |  |  |  |
|----------|--------|--|--|--|
| 673.7047 | 1225   |  |  |  |
| 673.7374 | 1087   |  |  |  |
| 685.4038 | 3506   |  |  |  |
| 686.4077 | 462    |  |  |  |
| 695.3854 | 1117   |  |  |  |
| 696.1725 | 1182   |  |  |  |
| 699.4192 | 12751  |  |  |  |
| 699.4192 | 6263   |  |  |  |
| 699.4193 | 12021  |  |  |  |
| 700.4222 | 2017   |  |  |  |
| 713.3980 | 68534  |  |  |  |
| 714.4025 | 23193  |  |  |  |
| 714.4025 | 11483  |  |  |  |
| 715.4015 | 2407   |  |  |  |
| 722.5981 | 1112   |  |  |  |
| 727.4138 | 29977  |  |  |  |
| 727.4138 | 13847  |  |  |  |
| 727.4140 | 30628  |  |  |  |
| 728.4155 | 617    |  |  |  |
| 741.4279 | 4173   |  |  |  |
| 745.4244 | 157522 |  |  |  |
| 745.4244 | 153408 |  |  |  |
| 747.4256 | 11202  |  |  |  |
| 747.4257 | 1030   |  |  |  |
| 756.3377 | 3013   |  |  |  |
| 756.9504 | 1392   |  |  |  |
| 769.4607 | 6254   |  |  |  |
| 769.4608 | 6524   |  |  |  |
| 769.4608 | 3860   |  |  |  |
| 770.4631 | 135    |  |  |  |
| 776.9428 | 2020   |  |  |  |
| 777.9493 | 715    |  |  |  |
| 784.4708 | 1213   |  |  |  |
| 798.4858 | 6697   |  |  |  |
| 799.9646 | 1870   |  |  |  |
| 809.4765 | 1138   |  |  |  |
| 812.4679 | 1341   |  |  |  |
| 816.5106 | 1622   |  |  |  |
| 826.4815 | 87574  |  |  |  |
| 826.4818 | 91200  |  |  |  |
| 828.4854 | 3171   |  |  |  |

|           |        |  |  |  |
|-----------|--------|--|--|--|
| 833.4846  | 1894   |  |  |  |
| 840.4970  | 9561   |  |  |  |
| 840.4971  | 9281   |  |  |  |
| 840.4971  | 5189   |  |  |  |
| 858.5076  | 8069   |  |  |  |
| 858.5076  | 21312  |  |  |  |
| 858.5078  | 20911  |  |  |  |
| 859.5104  | 2032   |  |  |  |
| 871.3655  | 97929  |  |  |  |
| 871.3655  | 95333  |  |  |  |
| 873.3693  | 4698   |  |  |  |
| 874.3699  | 769    |  |  |  |
| 878.5123  | 1762   |  |  |  |
| 897.5171  | 1214   |  |  |  |
| 911.5286  | 2151   |  |  |  |
| 915.5289  | 201153 |  |  |  |
| 915.5291  | 200931 |  |  |  |
| 916.5316  | 4620   |  |  |  |
| 916.5319  | 31032  |  |  |  |
| 939.4893  | 1329   |  |  |  |
| 939.5650  | 40204  |  |  |  |
| 939.5654  | 40231  |  |  |  |
| 940.5640  | 419    |  |  |  |
| 940.5679  | 6365   |  |  |  |
| 941.5670  | 199    |  |  |  |
| 942.5682  | 918    |  |  |  |
| 968.5551  | 7615   |  |  |  |
| 994.0363  | 1421   |  |  |  |
| 996.4859  | 1153   |  |  |  |
| 997.5826  | 1358   |  |  |  |
| 1002.2073 | 3827   |  |  |  |
| 1002.5411 | 1862   |  |  |  |
| 1010.5982 | 2949   |  |  |  |
| 1028.6123 | 140563 |  |  |  |
| 1028.6126 | 147845 |  |  |  |
| 1029.6150 | 9218   |  |  |  |
| 1031.6196 | 1168   |  |  |  |
| 1052.6484 | 6730   |  |  |  |
| 1052.6486 | 7100   |  |  |  |
| 1053.6509 | 384    |  |  |  |
| 1067.6233 | 7545   |  |  |  |

|           |       |  |  |  |
|-----------|-------|--|--|--|
| 1082.6292 | 1374  |  |  |  |
| 1090.5600 | 1520  |  |  |  |
| 1141.6355 | 3337  |  |  |  |
| 1141.6929 | 46609 |  |  |  |
| 1141.6931 | 47450 |  |  |  |
| 1142.0032 | 1691  |  |  |  |
| 1142.6982 | 2052  |  |  |  |
| 1143.6985 | 234   |  |  |  |
| 1180.7065 | 3263  |  |  |  |
| 1184.5400 | 1793  |  |  |  |
| 1198.6540 | 1698  |  |  |  |
| 1255.6759 | 7952  |  |  |  |
| 1256.6650 | 1808  |  |  |  |
| 1259.7723 | 1680  |  |  |  |
| 1260.1959 | 1630  |  |  |  |
| 1269.7534 | 22788 |  |  |  |
| 1269.7575 | 26965 |  |  |  |
| 1270.7565 | 5692  |  |  |  |
| 1271.6222 | 2801  |  |  |  |
| 1313.9716 | 8211  |  |  |  |
| 1347.3319 | 11913 |  |  |  |
| 1349.1544 | 8214  |  |  |  |
| 1354.7444 | 9727  |  |  |  |
| 1373.6716 | 10076 |  |  |  |
| 1380.5200 | 7557  |  |  |  |
| 1381.1846 | 7029  |  |  |  |
| 1383.8471 | 17535 |  |  |  |
| 1392.5121 | 8175  |  |  |  |
| 1394.1773 | 10545 |  |  |  |
| 1394.6716 | 17832 |  |  |  |
| 1399.8595 | 12405 |  |  |  |
| 1400.6930 | 11923 |  |  |  |
| 1402.5214 | 17423 |  |  |  |
| 1403.3638 | 33286 |  |  |  |
| 1405.8588 | 27602 |  |  |  |
| 1406.3489 | 13940 |  |  |  |
| 1406.6857 | 8405  |  |  |  |
| 1410.5328 | 7987  |  |  |  |
| 1411.3680 | 9421  |  |  |  |
| 1412.5298 | 12114 |  |  |  |
| 1414.6798 | 15987 |  |  |  |

|           |       |  |  |  |
|-----------|-------|--|--|--|
| 1425.3676 | 11473 |  |  |  |
| 1427.5400 | 18343 |  |  |  |
| 1430.0392 | 14051 |  |  |  |
| 1433.8702 | 22850 |  |  |  |
| 1441.3904 | 11807 |  |  |  |
| 1444.0535 | 22377 |  |  |  |
| 1444.3822 | 11198 |  |  |  |
| 1445.7164 | 16803 |  |  |  |
| 1452.7205 | 23291 |  |  |  |
| 1457.8914 | 20336 |  |  |  |
| 1458.2273 | 27005 |  |  |  |
| 1458.4003 | 12672 |  |  |  |
| 1458.5513 | 12005 |  |  |  |
| 1467.3931 | 27682 |  |  |  |
| 1468.2313 | 51568 |  |  |  |
| 1469.5656 | 17266 |  |  |  |
| 1469.7229 | 15228 |  |  |  |
| 1473.7206 | 14558 |  |  |  |
| 1473.9022 | 15044 |  |  |  |
| 1477.1067 | 11422 |  |  |  |
| 1477.9139 | 13534 |  |  |  |
| 1479.5808 | 12591 |  |  |  |
| 1487.0818 | 11628 |  |  |  |
| 1494.7384 | 12436 |  |  |  |
| 1502.0862 | 41298 |  |  |  |
| 1506.0851 | 11811 |  |  |  |
| 1508.3370 | 10980 |  |  |  |
| 1511.3337 | 11479 |  |  |  |
| 1516.5348 | 7867  |  |  |  |
| 1517.7240 | 7956  |  |  |  |
| 1518.1368 | 9360  |  |  |  |
| 1520.3339 | 14421 |  |  |  |
| 1523.3346 | 7668  |  |  |  |
| 1529.3169 | 7294  |  |  |  |
| 1534.1465 | 31743 |  |  |  |
| 1553.7576 | 59473 |  |  |  |
| 1555.3589 | 13832 |  |  |  |
| 1555.9973 | 13937 |  |  |  |
| 1557.5667 | 9011  |  |  |  |
| 1560.5531 | 13901 |  |  |  |
| 1567.7694 | 16201 |  |  |  |

|           |       |  |  |  |
|-----------|-------|--|--|--|
| 1568.3672 | 8528  |  |  |  |
| 1570.9696 | 11313 |  |  |  |
| 1571.1722 | 15722 |  |  |  |
| 1574.1679 | 17733 |  |  |  |
| 1575.3748 | 13436 |  |  |  |
| 1579.1646 | 10531 |  |  |  |
| 1579.7721 | 11529 |  |  |  |
| 1601.9977 | 15914 |  |  |  |
| 1613.5931 | 18714 |  |  |  |
| 1619.9890 | 14394 |  |  |  |
| 1624.7809 | 19472 |  |  |  |
| 1628.0114 | 11429 |  |  |  |
| 1628.3821 | 8420  |  |  |  |
| 1632.7709 | 17155 |  |  |  |
| 1647.6150 | 14156 |  |  |  |
| 1647.8273 | 24512 |  |  |  |
| 1648.0099 | 8673  |  |  |  |
| 1648.2202 | 31461 |  |  |  |
| 1649.4010 | 15214 |  |  |  |
| 1650.6108 | 9013  |  |  |  |
| 1655.9636 | 8468  |  |  |  |
| 1656.9442 | 7635  |  |  |  |
| 1660.4137 | 11475 |  |  |  |
| 1660.6165 | 14156 |  |  |  |
| 1660.8153 | 17295 |  |  |  |
| 1661.2150 | 13926 |  |  |  |
| 1668.4347 | 9390  |  |  |  |
| 1668.6117 | 13390 |  |  |  |
| 1675.2300 | 16755 |  |  |  |
| 1680.8287 | 27237 |  |  |  |
| 1687.4315 | 10896 |  |  |  |
| 1689.0466 | 18661 |  |  |  |
| 1689.8013 | 13713 |  |  |  |
| 1692.8197 | 13868 |  |  |  |
| 1694.2573 | 11042 |  |  |  |
| 1697.2388 | 13497 |  |  |  |
| 1739.0557 | 31501 |  |  |  |
| 1743.0668 | 31623 |  |  |  |
| 1759.4811 | 14151 |  |  |  |
| 1818.3806 | 12961 |  |  |  |
| 1841.6383 | 18566 |  |  |  |

|           |       |  |  |  |
|-----------|-------|--|--|--|
| 1842.1449 | 48028 |  |  |  |
| 1842.6276 | 14119 |  |  |  |
| 1845.6322 | 20257 |  |  |  |
| 1856.1387 | 15685 |  |  |  |
| 1873.9125 | 15600 |  |  |  |
| 1900.1722 | 19430 |  |  |  |
| 1939.2183 | 12978 |  |  |  |
| 1941.9496 | 15102 |  |  |  |
| 1970.7144 | 20781 |  |  |  |
| 1972.2129 | 15779 |  |  |  |
| 1998.7355 | 24269 |  |  |  |
| 2103.7918 | 14114 |  |  |  |
| 2129.7940 | 10301 |  |  |  |
| 2131.0444 | 27114 |  |  |  |
| 2131.3052 | 11345 |  |  |  |
| 2155.8113 | 33088 |  |  |  |
| 2156.3150 | 21295 |  |  |  |
| 2156.8145 | 9779  |  |  |  |
| 2570.2470 | 4471  |  |  |  |
| 2588.5928 | 13670 |  |  |  |
| 2968.1419 | 9727  |  |  |  |
| 3682.7803 | 48962 |  |  |  |
| 3882.3865 | 55582 |  |  |  |
| 3895.8872 | 59099 |  |  |  |
| 3896.3810 | 70410 |  |  |  |
| 3903.3810 | 36200 |  |  |  |
| 3939.4200 | 46620 |  |  |  |
| 3939.9048 | 58718 |  |  |  |
| 3939.9266 | 41905 |  |  |  |
| 4094.0240 | 6067  |  |  |  |
| 4132.5420 | 13313 |  |  |  |
| 4184.5557 | 4263  |  |  |  |
| 4193.5512 | 5169  |  |  |  |
| 4196.0504 | 15888 |  |  |  |
| 4204.0469 | 22150 |  |  |  |
| 4209.0596 | 34534 |  |  |  |
| 4223.5821 | 6089  |  |  |  |
| 4310.1190 | 36580 |  |  |  |
| 4323.6399 | 8106  |  |  |  |
| 4344.1406 | 9445  |  |  |  |
| 4382.2042 | 6910  |  |  |  |

|           |        |                                                                                               |           |        |         |
|-----------|--------|-----------------------------------------------------------------------------------------------|-----------|--------|---------|
| 4385.6799 | 11283  |                                                                                               |           |        |         |
| 4394.6691 | 14422  |                                                                                               |           |        |         |
| 4396.1710 | 10910  |                                                                                               |           |        |         |
| 4425.6945 | 7906   |                                                                                               |           |        |         |
| 4455.2161 | 4108   |                                                                                               |           |        |         |
| 7192.4456 | 9837   | $\alpha b32+\beta b32$                                                                        | 7192.4800 | -4.8   | -0.0344 |
| 7249.4550 | 30001  | $\alpha b34+\beta b31; \alpha b31+\beta b34; \alpha b33+\beta b32;$<br>$\alpha b32+\beta b33$ | 7249.5014 | -6.4   | -0.0464 |
| 7250.4697 | 15467  |                                                                                               |           |        |         |
| 7267.4728 | 19954  |                                                                                               |           |        |         |
| 7267.4795 | 30001  | $\alpha b30+\beta b35; \alpha b35+\beta b30; \alpha b23+\beta b42$                            | 7267.5189 | -5.4   | -0.0394 |
| 7363.5148 | 27685  | $\alpha b34+\beta b32; \alpha b32+\beta b34$                                                  | 7362.5854 | 126.2  | 0.9294  |
| 7367.5393 | 9243   |                                                                                               |           |        |         |
| 7421.4042 | 16133  |                                                                                               |           |        |         |
| 7479.5513 | 20582  |                                                                                               |           |        |         |
| 7479.5714 | 34950  | $\alpha b31+\beta b36; \alpha b36+\beta b31$                                                  | 7479.6103 | -5.2   | -0.0390 |
| 7493.6241 | 24310  |                                                                                               |           |        |         |
| 7494.5845 | 24514  | $\alpha b32+\beta b35; \alpha b35+\beta b32$                                                  | 7494.5864 | -0.3   | -0.0019 |
| 7532.6242 | 15007  | $\alpha b34+\beta b34$                                                                        | 7532.6910 | -8.9   | -0.0668 |
| 7533.6237 | 13985  |                                                                                               |           |        |         |
| 7550.6141 | 21673  | $\alpha b33+\beta b35; \alpha b35+\beta b33$                                                  | 7550.6475 | -4.4   | -0.0333 |
| 7578.6448 | 13806  |                                                                                               |           |        |         |
| 7592.6510 | 41431  | $\alpha b32+\beta b36; \alpha b36+\beta b32$                                                  | 7592.6944 | -5.7   | -0.0434 |
| 7592.6530 | 33774  |                                                                                               |           |        |         |
| 7648.6933 | 16256  |                                                                                               |           |        |         |
| 7649.6774 | 18088  | $\alpha b33+\beta b36; \alpha b36+\beta b33; \alpha b32+\beta b37;$<br>$\alpha b37+\beta b32$ | 7649.7159 | -5.0   | -0.0385 |
| 7663.7260 | 64601  | $\alpha b34+\beta b35; \alpha b28+\beta b41; \alpha b35+\beta b34$                            | 7663.7315 | -0.7   | -0.0055 |
| 7664.6997 | 25215  |                                                                                               |           |        |         |
| 7677.6921 | 20448  |                                                                                               |           |        |         |
| 7691.7399 | 53057  | $\alpha b31+\beta b39; \alpha b39+\beta b31$                                                  | 7692.7215 | -127.6 | -0.9816 |
| 7706.7002 | 46373  | $\alpha b33+\beta b37; \alpha b37+\beta b33; \alpha b32+\beta b38;$<br>$\alpha b38+\beta b32$ | 7706.7373 | -4.8   | -0.0371 |
| 7762.7676 | 25839  | $\alpha b34+\beta b36; \alpha b36+\beta b34; \alpha b33+\beta b38;$<br>$\alpha b38+\beta b33$ | 7762.7999 | -4.2   | -0.0324 |
| 7778.7193 | 13126  |                                                                                               |           |        |         |
| 7791.8199 | 115069 | $\alpha b31+\beta b40; \alpha b30+\beta b41; \alpha b41+\beta b30;$<br>$\alpha b40+\beta b31$ | 7791.7901 | 3.8    | 0.0298  |
| 7805.7745 | 84143  | $\alpha b32+\beta b39; \alpha b39+\beta b32$                                                  | 7805.8057 | -4.0   | -0.0313 |
| 7819.7736 | 17517  | $\alpha b34+\beta b37; \alpha b37+\beta b34$                                                  | 7819.8214 | -6.1   | -0.0478 |
| 7861.8064 | 35448  | $\alpha b33+\beta b39; \alpha b39+\beta b33$                                                  | 7862.8271 | -129.8 | -1.0207 |
| 7876.7821 | 71799  | $\alpha b34+\beta b38; \alpha b38+\beta b34$                                                  | 7876.8429 | -7.7   | -0.0608 |

|           |        |                                                                                                                                                            |           |       |         |
|-----------|--------|------------------------------------------------------------------------------------------------------------------------------------------------------------|-----------|-------|---------|
| 7881.8072 | 20473  | $\alpha b30+\beta b42; \alpha b42+\beta b30$                                                                                                               | 7880.8371 | 123.1 | 0.9701  |
| 7893.8561 | 38889  | $\alpha b36+\beta b35; \alpha b35+\beta b36$                                                                                                               | 7893.8404 | 2.0   | 0.0157  |
| 7904.8051 | 150364 |                                                                                                                                                            |           |       |         |
| 7904.8247 | 227805 | $\alpha b31+\beta b41; \alpha b41+\beta b31; \alpha b32+\beta b40; \alpha b40+\beta b32$                                                                   | 7904.8742 | -6.3  | -0.0495 |
| 7948.8945 | 40249  |                                                                                                                                                            |           |       |         |
| 7961.7790 | 35080  | $\alpha b33+\beta b40; \alpha b40+\beta b33$                                                                                                               | 7961.8956 | -14.6 | -0.1166 |
| 7975.8613 | 162645 | $\alpha b34+\beta b39; \alpha b39+\beta b34$                                                                                                               | 7975.9113 | -6.3  | -0.0500 |
| 7975.9385 | 110197 |                                                                                                                                                            |           |       |         |
| 7993.8725 | 122622 | $\alpha b36+\beta b36; \alpha b31+\beta b42; \alpha b42+\beta b31$                                                                                         | 7993.9213 | -6.1  | -0.0488 |
| 7993.8870 | 43444  |                                                                                                                                                            |           |       |         |
| 8007.8406 | 65101  | $\alpha b38+\beta b35; \alpha b35+\beta b38$                                                                                                               | 8007.8833 | -5.3  | -0.0427 |
| 8017.9162 | 39929  | $\alpha b32+\beta b41; \alpha b41+\beta b32$                                                                                                               | 8017.9582 | -5.2  | -0.0421 |
| 8045.9411 | 11569  |                                                                                                                                                            |           |       |         |
| 8051.9401 | 15608  |                                                                                                                                                            |           |       |         |
| 8058.9146 | 11640  |                                                                                                                                                            |           |       |         |
| 8074.9193 | 162653 | $\alpha b34+\beta b40; \alpha b33+\beta b41; \alpha b41+\beta b33; \alpha b40+\beta b34$                                                                   | 8074.9797 | -7.5  | -0.0604 |
| 8074.9536 | 35980  |                                                                                                                                                            |           |       |         |
| 8075.9381 | 13554  |                                                                                                                                                            |           |       |         |
| 8106.9126 | 44135  |                                                                                                                                                            |           |       |         |
| 8106.9237 | 340364 |                                                                                                                                                            |           |       |         |
| 8106.9340 | 463168 | $\alpha b39+\beta b35; \alpha b35+\beta b39; \alpha b38+\beta b36; \alpha b36+\beta b38; \alpha b37+\beta b37; \alpha b32+\beta b42; \alpha b42+\beta b32$ | 8107.0054 | -8.8  | -0.0714 |
| 8163.9973 | 105697 | $\alpha b38+\beta b37; \alpha b37+\beta b38; \alpha b33+\beta b42; \alpha b42+\beta b33$                                                                   | 8164.0268 | -3.6  | -0.0295 |
| 8176.9796 | 37287  |                                                                                                                                                            |           |       |         |
| 8188.0070 | 82613  | $\alpha b34+\beta b41; \alpha b41+\beta b34$                                                                                                               | 8188.0637 | -6.9  | -0.0567 |
| 8205.9780 | 351217 | $\alpha b39+\beta b36; \alpha b36+\beta b39; \alpha b40+\beta b35; \alpha b35+\beta b40$                                                                   | 8206.0202 | -5.1  | -0.0422 |
| 8206.0010 | 51540  |                                                                                                                                                            |           |       |         |
| 8206.0551 | 280925 |                                                                                                                                                            |           |       |         |
| 8220.9526 | 51466  | $\alpha b38+\beta b38$                                                                                                                                     | 8220.9947 | -5.1  | -0.0421 |
| 8262.9849 | 87251  | $\alpha b39+\beta b37; \alpha b37+\beta b39$                                                                                                               | 8263.0416 | -6.9  | -0.0568 |
| 8276.0444 | 20769  |                                                                                                                                                            |           |       |         |
| 8276.0880 | 30012  |                                                                                                                                                            |           |       |         |
| 8277.0750 | 257950 | $\alpha b34+\beta b42; \alpha b42+\beta b34$                                                                                                               | 8277.1109 | -4.3  | -0.0359 |
| 8277.1129 | 210938 |                                                                                                                                                            |           |       |         |
| 8281.0794 | 4183   |                                                                                                                                                            |           |       |         |
| 8291.0893 | 48281  |                                                                                                                                                            |           |       |         |
| 8305.0450 | 23492  |                                                                                                                                                            |           |       |         |
| 8305.0957 | 193177 | $\alpha b40+\beta b36; \alpha b36+\beta b40$                                                                                                               | 8305.0886 | 0.9   | 0.0071  |



|           |         |                                                                    |           |        |         |
|-----------|---------|--------------------------------------------------------------------|-----------|--------|---------|
| 8319.9541 | 299219  | $\alpha b39+\beta b38; \alpha b38+\beta b39$                       | 8320.0631 | -13.1  | -0.1090 |
| 8320.0440 | 272518  |                                                                    |           |        |         |
| 8362.0903 | 105029  | $\alpha b40+\beta b37; \alpha b37+\beta b40$                       | 8362.1101 | -2.4   | -0.0197 |
| 8382.0823 | 11251   |                                                                    |           |        |         |
| 8391.1010 | 116995  |                                                                    |           |        |         |
| 8402.1296 | 15120   |                                                                    |           |        |         |
| 8407.1320 | 17588   |                                                                    |           |        |         |
| 8408.0791 | 223158  | $\alpha b42+\beta b35; \alpha b35+\beta b42$                       | 8408.1514 | -8.6   | -0.0723 |
| 8419.1090 | 837244  | $\alpha b39+\beta b39; \alpha b40+\beta b38; \alpha b38+\beta b40$ | 8419.1315 | -2.7   | -0.0225 |
| 8419.1518 | 630283  |                                                                    |           |        |         |
| 8475.1487 | 62374   | $\alpha b41+\beta b37; \alpha b37+\beta b41$                       | 8475.1941 | -5.4   | -0.0454 |
| 8490.1628 | 177299  |                                                                    |           |        |         |
| 8502.1664 | 17570   |                                                                    |           |        |         |
| 8507.1840 | 287684  |                                                                    |           |        |         |
| 8507.1989 | 349318  | $\alpha b42+\beta b36; \alpha b36+\beta b42$                       | 8507.2198 | -2.5   | -0.0209 |
| 8517.1660 | 308703  |                                                                    |           |        |         |
| 8518.1540 | 495053  |                                                                    |           |        |         |
| 8518.1950 | 13885   |                                                                    |           |        |         |
| 8518.2338 | 655781  | $\alpha b40+\beta b39; \alpha b39+\beta b40$                       | 8518.1999 | 4.0    | 0.0339  |
| 8532.1477 | 172298  | $\alpha b41+\beta b38; \alpha b38+\beta b41$                       | 8532.2156 | -8.0   | -0.0679 |
| 8564.1979 | 138378  | $\alpha b42+\beta b37; \alpha b37+\beta b42$                       | 8564.2413 | -5.1   | -0.0434 |
| 8574.1844 | 11556   |                                                                    |           |        |         |
| 8588.2077 | 36719   |                                                                    |           |        |         |
| 8597.2606 | 6446    |                                                                    |           |        |         |
| 8603.2198 | 152359  |                                                                    |           |        |         |
| 8616.3000 | 166210  |                                                                    |           |        |         |
| 8618.2160 | 511172  | $\alpha b40+\beta b40$                                             | 8617.2682 | 110.0  | 0.9478  |
| 8618.2332 | 21797   |                                                                    |           |        |         |
| 8620.2180 | 545079  |                                                                    |           |        |         |
| 8620.2495 | 821346  | $\alpha b42+\beta b38; \alpha b38+\beta b42$                       | 8621.2626 | -117.5 | -1.0131 |
| 8631.2187 | 372113  | $\alpha b41+\beta b39; \alpha b39+\beta b41$                       | 8631.2840 | -7.6   | -0.0652 |
| 8677.2954 | 37176   |                                                                    |           |        |         |
| 8692.3408 | 132894  |                                                                    |           |        |         |
| 8703.3361 | 120877  |                                                                    |           |        |         |
| 8720.2890 | 1363990 | $\alpha b42+\beta b39; \alpha b39+\beta b42$                       | 8720.3311 | -4.8   | -0.0421 |
| 8720.3270 | 3739    |                                                                    |           |        |         |
| 8720.3302 | 1239131 |                                                                    |           |        |         |
| 8730.2990 | 560277  |                                                                    |           |        |         |
| 8730.2996 | 579556  | $\alpha b41+\beta b40; \alpha b40+\beta b41$                       | 8730.3524 | -6.0   | -0.0528 |
| 8761.3269 | 10176   |                                                                    |           |        |         |
| 8776.4089 | 30611   |                                                                    |           |        |         |

|                                         |           |                                                      |                                        |                     |                 |
|-----------------------------------------|-----------|------------------------------------------------------|----------------------------------------|---------------------|-----------------|
| 8792.3363                               | 9569      |                                                      |                                        |                     |                 |
| 8803.3372                               | 100866    |                                                      |                                        |                     |                 |
| 8819.3550                               | 1701501   | $\alpha$ b42+ $\beta$ b40; $\alpha$ b40+ $\beta$ b42 | 8819.3995                              | -5.1                | -0.0445         |
| 8819.3779                               | 1635989   |                                                      |                                        |                     |                 |
| 8830.3599                               | 11883     |                                                      |                                        |                     |                 |
| 8843.3186                               | 127293    | $\alpha$ b41+ $\beta$ b41                            | 8843.4365                              | -13.3               | -0.1179         |
| 8886.3888                               | 10179     |                                                      |                                        |                     |                 |
| 8891.3795                               | 9048      |                                                      |                                        |                     |                 |
| 8915.3999                               | 42004     |                                                      |                                        |                     |                 |
| 8921.3953                               | 6176      |                                                      |                                        |                     |                 |
| 8932.4280                               | 624615    | $\alpha$ b42+ $\beta$ b41; $\alpha$ b41+ $\beta$ b42 | 8932.4836                              | -6.2                | -0.0556         |
| 8932.5217                               | 624548    |                                                      |                                        |                     |                 |
| 9003.4534                               | 50722     |                                                      |                                        |                     |                 |
| 9021.4839                               | 69428     | $\alpha$ b42+ $\beta$ b42                            | 9021.5307                              | -5.2                | -0.0469         |
| Experimental<br>[M+H] <sup>+</sup> [Da] | Intensity | Fragment label                                       | Theoretical<br>[M+H] <sup>+</sup> [Da] | $\Delta$ m<br>[ppm] | $\Delta$ m [Da] |

**Supplementary Table 4**

| Amyloid- $\beta$ 17-28 $\times$ 1-5, -H <sub>2</sub> O link, b-, y-fragments |                           |                         |                                      |
|------------------------------------------------------------------------------|---------------------------|-------------------------|--------------------------------------|
| Sequence ( $\alpha+\beta$ )                                                  | Label style 1             | Label style 2           | Deconvoluted mass [M+H] <sup>+</sup> |
| G                                                                            | $\alpha$ 9-9              | $\alpha$ i9             | 58.02929                             |
| A                                                                            | $\alpha$ 5-5              | $\alpha$ i5             | 72.04494                             |
| A                                                                            | $\beta$ 2-2               | $\beta$ i2              | 72.04494                             |
| S                                                                            | $\alpha$ 10-10            | $\alpha$ i10            | 88.03985                             |
| V                                                                            | $\alpha$ 8-8              | $\alpha$ i8             | 100.07624                            |
| V                                                                            | $\alpha$ 2-2              | $\alpha$ i2             | 100.07624                            |
| E                                                                            | $\alpha$ 6-6              | $\alpha$ i6             | 112.03985                            |
| <L                                                                           | $\alpha$ 1-1              | $\alpha$ b1             | 114.09189                            |
| N                                                                            | $\alpha$ 11-11            | $\alpha$ i11            | 115.05075                            |
| D                                                                            | $\beta$ 1-1               | $\beta$ b1              | 116.03477                            |
| D                                                                            | $\alpha$ 7-7              | $\alpha$ i7             | 116.03477                            |
| E                                                                            | $\beta$ 3-3               | $\beta$ i3              | 130.05042                            |
| GS                                                                           | $\alpha$ 9-10             | $\alpha$ i9-10          | 145.06132                            |
| K>                                                                           | $\alpha$ 12-12            | $\alpha$ y1             | 147.11335                            |
| F                                                                            | $\alpha$ 3-3              | $\alpha$ i3             | 148.07624                            |
| F                                                                            | $\alpha$ 4-4              | $\alpha$ i4             | 148.07624                            |
| F                                                                            | $\beta$ 4-4               | $\beta$ i4              | 148.07624                            |
| VG                                                                           | $\alpha$ 8-9              | $\alpha$ i8-9           | 157.0977                             |
| R>                                                                           | $\beta$ 5-5               | $\beta$ y1              | 175.1195                             |
| AE                                                                           | $\alpha$ 5-6              | $\alpha$ i5-6           | 183.07697                            |
| DA                                                                           | $\beta$ 1-2               | $\beta$ b2              | 187.07188                            |
| AE                                                                           | $\beta$ 2-3               | $\beta$ i2-3            | 201.08753                            |
| SN                                                                           | $\alpha$ 10-11            | $\alpha$ i10-11         | 202.08278                            |
| <LV                                                                          | $\alpha$ 1-2              | $\alpha$ b2             | 213.1603                             |
| DV                                                                           | $\alpha$ 7-8              | $\alpha$ i7-8           | 215.10318                            |
| FA                                                                           | $\alpha$ 4-5              | $\alpha$ i4-5           | 219.11335                            |
| E+D                                                                          | $\alpha$ 6-6+ $\beta$ 1-1 | $\alpha$ i6+ $\beta$ b1 | 227.0668                             |
| ED                                                                           | $\alpha$ 6-7              | $\alpha$ i6-7           | 227.0668                             |
| VGS                                                                          | $\alpha$ 8-10             | $\alpha$ i8-10          | 244.12973                            |
| VF                                                                           | $\alpha$ 2-3              | $\alpha$ i2-3           | 247.14465                            |
| GSN                                                                          | $\alpha$ 9-11             | $\alpha$ i9-11          | 259.10424                            |
| NK>                                                                          | $\alpha$ 11-12            | $\alpha$ y2             | 261.15628                            |
| DVG                                                                          | $\alpha$ 7-9              | $\alpha$ i7-9           | 272.12465                            |
| EF                                                                           | $\beta$ 3-4               | $\beta$ i3-4            | 277.11883                            |
| FF                                                                           | $\alpha$ 3-4              | $\alpha$ i3-4           | 295.14465                            |

|        |                        |                          |           |
|--------|------------------------|--------------------------|-----------|
| E+DA   | $\alpha 6-6+\beta 1-2$ | $\alpha i 6+\beta b 2$   | 298.10391 |
| AE+D   | $\alpha 5-6+\beta 1-1$ | $\alpha i 5-6+\beta b 1$ | 298.10391 |
| AED    | $\alpha 5-7$           | $\alpha i 5-7$           | 298.10391 |
| DAE    | $\beta 1-3$            | $\beta b 3$              | 316.11447 |
| FR>    | $\beta 4-5$            | $\beta y 2$              | 322.18791 |
| EDV    | $\alpha 6-8$           | $\alpha i 6-8$           | 326.13521 |
| FAE    | $\alpha 4-6$           | $\alpha i 4-6$           | 330.14538 |
| ED+D   | $\alpha 6-7+\beta 1-1$ | $\alpha i 6-7+\beta b 1$ | 342.09374 |
| AEF    | $\beta 2-4$            | $\beta i 2-4$            | 348.15595 |
| SNK>   | $\alpha 10-12$         | $\alpha y 3$             | 348.18831 |
| VGSN   | $\alpha 8-11$          | $\alpha i 8-11$          | 358.17266 |
| DVGS   | $\alpha 7-10$          | $\alpha i 7-10$          | 359.15667 |
| <LVF   | $\alpha 1-3$           | $\alpha b 3$             | 360.22872 |
| FFA    | $\alpha 3-5$           | $\alpha i 3-5$           | 366.18177 |
| AE+DA  | $\alpha 5-6+\beta 1-2$ | $\alpha i 5-6+\beta b 2$ | 369.14102 |
| EDVG   | $\alpha 6-9$           | $\alpha i 6-9$           | 383.15667 |
| VFF    | $\alpha 2-4$           | $\alpha i 2-4$           | 394.21307 |
| AEDV   | $\alpha 5-8$           | $\alpha i 5-8$           | 397.17232 |
| GSNK>  | $\alpha 9-12$          | $\alpha y 4$             | 405.20977 |
| AED+D  | $\alpha 5-7+\beta 1-1$ | $\alpha i 5-7+\beta b 1$ | 413.13085 |
| ED+DA  | $\alpha 6-7+\beta 1-2$ | $\alpha i 6-7+\beta b 2$ | 413.13085 |
| E+DAE  | $\alpha 6-6+\beta 1-3$ | $\alpha i 6+\beta b 3$   | 427.1465  |
| EDV+D  | $\alpha 6-8+\beta 1-1$ | $\alpha i 6-8+\beta b 1$ | 441.16215 |
| FAE+D  | $\alpha 4-6+\beta 1-1$ | $\alpha i 4-6+\beta b 1$ | 445.17232 |
| FAED   | $\alpha 4-7$           | $\alpha i 4-7$           | 445.17232 |
| EFR>   | $\beta 3-5$            | $\beta y 3$              | 451.23051 |
| AEDVG  | $\alpha 5-9$           | $\alpha i 5-9$           | 454.19379 |
| DAEF   | $\beta 1-4$            | $\beta b 4$              | 463.18289 |
| VFFA   | $\alpha 2-5$           | $\alpha i 2-5$           | 465.25018 |
| EDVGS  | $\alpha 6-10$          | $\alpha i 6-10$          | 470.1887  |
| DVGSN  | $\alpha 7-11$          | $\alpha i 7-11$          | 473.1996  |
| FFAE   | $\alpha 3-6$           | $\alpha i 3-6$           | 477.21379 |
| AED+DA | $\alpha 5-7+\beta 1-2$ | $\alpha i 5-7+\beta b 2$ | 484.16797 |
| EDVG+D | $\alpha 6-9+\beta 1-1$ | $\alpha i 6-9+\beta b 1$ | 498.18362 |
| AE+DAE | $\alpha 5-6+\beta 1-3$ | $\alpha i 5-6+\beta b 3$ | 498.18362 |
| VGSNK> | $\alpha 8-12$          | $\alpha y 5$             | 504.27818 |
| <LVFF  | $\alpha 1-4$           | $\alpha b 4$             | 507.29713 |
| EDV+DA | $\alpha 6-8+\beta 1-2$ | $\alpha i 6-8+\beta b 2$ | 512.19927 |
| AEDV+D | $\alpha 5-8+\beta 1-1$ | $\alpha i 5-8+\beta b 1$ | 512.19927 |
| FAE+DA | $\alpha 4-6+\beta 1-2$ | $\alpha i 4-6+\beta b 2$ | 516.20944 |

|          |                             |                             |           |
|----------|-----------------------------|-----------------------------|-----------|
| AEFR>    | $\beta_{2-5}$               | $\beta_{y4}$                | 522.26762 |
| AEDVGS   | $\alpha_{5-10}$             | $\alpha_{i5-10}$            | 541.22582 |
| ED+DAE   | $\alpha_{6-7+\beta_{1-3}}$  | $\alpha_{i6-7+\beta_{b3}}$  | 542.17345 |
| FAEDV    | $\alpha_{4-8}$              | $\alpha_{i4-8}$             | 544.24074 |
| FAED+D   | $\alpha_{4-7+\beta_{1-1}}$  | $\alpha_{i4-7+\beta_{b1}}$  | 560.19927 |
| AEDVG+D  | $\alpha_{5-9+\beta_{1-1}}$  | $\alpha_{i5-9+\beta_{b1}}$  | 569.22073 |
| EDVG+DA  | $\alpha_{6-9+\beta_{1-2}}$  | $\alpha_{i6-9+\beta_{b2}}$  | 569.22073 |
| E+DAEF   | $\alpha_{6-6+\beta_{1-4}}$  | $\alpha_{i6+\beta_{b4}}$    | 574.21492 |
| VFFAE    | $\alpha_{2-6}$              | $\alpha_{i2-6}$             | 576.28221 |
| <LVFFA   | $\alpha_{1-5}$              | $\alpha_{b5}$               | 578.33424 |
| AEDV+DA  | $\alpha_{5-8+\beta_{1-2}}$  | $\alpha_{i5-8+\beta_{b2}}$  | 583.23638 |
| EDVGSN   | $\alpha_{6-11}$             | $\alpha_{i6-11}$            | 584.23163 |
| EDVGS+D  | $\alpha_{6-10+\beta_{1-1}}$ | $\alpha_{i6-10+\beta_{b1}}$ | 585.21564 |
| FFAE+D   | $\alpha_{3-6+\beta_{1-1}}$  | $\alpha_{i3-6+\beta_{b1}}$  | 592.24074 |
| FFAED    | $\alpha_{3-7}$              | $\alpha_{i3-7}$             | 592.24074 |
| FAEDVG   | $\alpha_{4-9}$              | $\alpha_{i4-9}$             | 601.2622  |
| AED+DAE  | $\alpha_{5-7+\beta_{1-3}}$  | $\alpha_{i5-7+\beta_{b3}}$  | 613.21056 |
| DVGSNK>  | $\alpha_{7-12}$             | $\alpha_{y6}$               | 619.30513 |
| FAED+DA  | $\alpha_{4-7+\beta_{1-2}}$  | $\alpha_{i4-7+\beta_{b2}}$  | 631.23638 |
| DAEFR>   | $\beta_{1-5}$               | $\beta_{full} (\beta_{y5})$ | 637.29456 |
| AEDVG+DA | $\alpha_{5-9+\beta_{1-2}}$  | $\alpha_{i5-9+\beta_{b2}}$  | 640.25784 |
| EDV+DAE  | $\alpha_{6-8+\beta_{1-3}}$  | $\alpha_{i6-8+\beta_{b3}}$  | 641.24186 |
| FAE+DAE  | $\alpha_{4-6+\beta_{1-3}}$  | $\alpha_{i4-6+\beta_{b3}}$  | 645.25203 |
| AE+DAEF  | $\alpha_{5-6+\beta_{1-4}}$  | $\alpha_{i5-6+\beta_{b4}}$  | 645.25203 |
| AEDVGSN  | $\alpha_{5-11}$             | $\alpha_{i5-11}$            | 655.26874 |
| AEDVGS+D | $\alpha_{5-10+\beta_{1-1}}$ | $\alpha_{i5-10+\beta_{b1}}$ | 656.25276 |
| EDVGS+DA | $\alpha_{6-10+\beta_{1-2}}$ | $\alpha_{i6-10+\beta_{b2}}$ | 656.25276 |
| FAEDV+D  | $\alpha_{4-8+\beta_{1-1}}$  | $\alpha_{i4-8+\beta_{b1}}$  | 659.26768 |
| FFAE+DA  | $\alpha_{3-6+\beta_{1-2}}$  | $\alpha_{i3-6+\beta_{b2}}$  | 663.27785 |
| FAEDVGS  | $\alpha_{4-10}$             | $\alpha_{i4-10}$            | 688.29423 |
| ED+DAEF  | $\alpha_{6-7+\beta_{1-4}}$  | $\alpha_{i6-7+\beta_{b4}}$  | 689.24186 |
| <LVFFAE  | $\alpha_{1-6}$              | $\alpha_{b6}$               | 689.36627 |
| VFFAED   | $\alpha_{2-7}$              | $\alpha_{i2-7}$             | 691.30915 |
| VFFAE+D  | $\alpha_{2-6+\beta_{1-1}}$  | $\alpha_{i2-6+\beta_{b1}}$  | 691.30915 |
| FFAEDV   | $\alpha_{3-8}$              | $\alpha_{i3-8}$             | 691.30915 |
| EDVG+DAE | $\alpha_{6-9+\beta_{1-3}}$  | $\alpha_{i6-9+\beta_{b3}}$  | 698.26332 |
| EDVGSN+D | $\alpha_{6-11+\beta_{1-1}}$ | $\alpha_{i6-11+\beta_{b1}}$ | 699.25857 |
| FFAED+D  | $\alpha_{3-7+\beta_{1-1}}$  | $\alpha_{i3-7+\beta_{b1}}$  | 707.26768 |
| AEDV+DAE | $\alpha_{5-8+\beta_{1-3}}$  | $\alpha_{i5-8+\beta_{b3}}$  | 712.27897 |
| FAEDVG+D | $\alpha_{4-9+\beta_{1-1}}$  | $\alpha_{i4-9+\beta_{b1}}$  | 716.28914 |

|            |                         |                           |           |
|------------|-------------------------|---------------------------|-----------|
| AEDVGS+DA  | $\alpha 5-10+\beta 1-2$ | $\alpha i 5-10+\beta b 2$ | 727.28987 |
| FAEDV+DA   | $\alpha 4-8+\beta 1-2$  | $\alpha i 4-8+\beta b 2$  | 730.30479 |
| EDVGSNK>   | $\alpha 6-12$           | $\alpha y 7$              | 730.33716 |
| E+DAEFR>   | $\alpha 6-6+\beta 1-5$  | $\alpha i 6+\beta full$   | 748.32659 |
| FFAEDVG    | $\alpha 3-9$            | $\alpha i 3-9$            | 748.33061 |
| FAED+DAE   | $\alpha 4-7+\beta 1-3$  | $\alpha i 4-7+\beta b 3$  | 760.27897 |
| AED+DAEF   | $\alpha 5-7+\beta 1-4$  | $\alpha i 5-7+\beta b 4$  | 760.27897 |
| VFFAE+DA   | $\alpha 2-6+\beta 1-2$  | $\alpha i 2-6+\beta b 2$  | 762.34626 |
| AEDVG+DAE  | $\alpha 5-9+\beta 1-3$  | $\alpha i 5-9+\beta b 3$  | 769.30044 |
| AEDVGSN+D  | $\alpha 5-11+\beta 1-1$ | $\alpha i 5-11+\beta b 1$ | 770.29569 |
| EDVGSN+DA  | $\alpha 6-11+\beta 1-2$ | $\alpha i 6-11+\beta b 2$ | 770.29569 |
| FFAED+DA   | $\alpha 3-7+\beta 1-2$  | $\alpha i 3-7+\beta b 2$  | 778.30479 |
| EDVGS+DAE  | $\alpha 6-10+\beta 1-3$ | $\alpha i 6-10+\beta b 3$ | 785.29535 |
| FAEDVG+DA  | $\alpha 4-9+\beta 1-2$  | $\alpha i 4-9+\beta b 2$  | 787.32626 |
| EDV+DAEF   | $\alpha 6-8+\beta 1-4$  | $\alpha i 6-8+\beta b 4$  | 788.31027 |
| VFFAEDV    | $\alpha 2-8$            | $\alpha i 2-8$            | 790.37756 |
| FAE+DAEF   | $\alpha 4-6+\beta 1-4$  | $\alpha i 4-6+\beta b 4$  | 792.32044 |
| FFAE+DAE   | $\alpha 3-6+\beta 1-3$  | $\alpha i 3-6+\beta b 3$  | 792.32044 |
| AEDVGSNK>  | $\alpha 5-12$           | $\alpha y 8$              | 801.37427 |
| FAEDVGSN   | $\alpha 4-11$           | $\alpha i 4-11$           | 802.33716 |
| FAEDVGS+D  | $\alpha 4-10+\beta 1-1$ | $\alpha i 4-10+\beta b 1$ | 803.32117 |
| <LVFFAE+D  | $\alpha 1-6+\beta 1-1$  | $\alpha b 6+\beta b 1$    | 804.39321 |
| <LVFFAED   | $\alpha 1-7$            | $\alpha b 7$              | 804.39321 |
| VFFAED+D   | $\alpha 2-7+\beta 1-1$  | $\alpha i 2-7+\beta b 1$  | 806.33609 |
| FFAEDV+D   | $\alpha 3-8+\beta 1-1$  | $\alpha i 3-8+\beta b 1$  | 806.33609 |
| AE+DAEFR>  | $\alpha 5-6+\beta 1-5$  | $\alpha i 5-6+\beta full$ | 819.3637  |
| FFAEDVGS   | $\alpha 3-10$           | $\alpha i 3-10$           | 835.36264 |
| AEDVGSN+DA | $\alpha 5-11+\beta 1-2$ | $\alpha i 5-11+\beta b 2$ | 841.3328  |
| EDVG+DAEF  | $\alpha 6-9+\beta 1-4$  | $\alpha i 6-9+\beta b 4$  | 845.33174 |
| EDVGSNK>+D | $\alpha 6-12+\beta 1-1$ | $\alpha y 7+\beta b 1$    | 845.3641  |
| VFFAEDVG   | $\alpha 2-9$            | $\alpha i 2-9$            | 847.39903 |
| AEDVGS+DAE | $\alpha 5-10+\beta 1-3$ | $\alpha i 5-10+\beta b 3$ | 856.33246 |
| AEDV+DAEF  | $\alpha 5-8+\beta 1-4$  | $\alpha i 5-8+\beta b 4$  | 859.34739 |
| FAEDV+DAE  | $\alpha 4-8+\beta 1-3$  | $\alpha i 4-8+\beta b 3$  | 859.34739 |
| ED+DAEFR>  | $\alpha 6-7+\beta 1-5$  | $\alpha i 6-7+\beta full$ | 863.35353 |
| FFAEDVG+D  | $\alpha 3-9+\beta 1-1$  | $\alpha i 3-9+\beta b 1$  | 863.35756 |
| FAEDVGS+DA | $\alpha 4-10+\beta 1-2$ | $\alpha i 4-10+\beta b 2$ | 874.35829 |
| <LVFFAE+DA | $\alpha 1-6+\beta 1-2$  | $\alpha b 6+\beta b 2$    | 875.43033 |
| VFFAED+DA  | $\alpha 2-7+\beta 1-2$  | $\alpha i 2-7+\beta b 2$  | 877.37321 |
| FFAEDV+DA  | $\alpha 3-8+\beta 1-2$  | $\alpha i 3-8+\beta b 2$  | 877.37321 |

|              |                         |                                  |            |
|--------------|-------------------------|----------------------------------|------------|
| VFFAE+DAE    | $\alpha 2-6+\beta 1-3$  | $\alpha i 2-6+\beta b 3$         | 891.38886  |
| EDVGSN+DAE   | $\alpha 6-11+\beta 1-3$ | $\alpha i 6-11+\beta b 3$        | 899.33828  |
| <LVFFAEDV    | $\alpha 1-8$            | $\alpha b 8$                     | 903.46163  |
| VFFAEDV+D    | $\alpha 2-8+\beta 1-1$  | $\alpha i 2-8+\beta b 1$         | 905.40451  |
| FAED+DAEF    | $\alpha 4-7+\beta 1-4$  | $\alpha i 4-7+\beta b 4$         | 907.34739  |
| FFAED+DAE    | $\alpha 3-7+\beta 1-3$  | $\alpha i 3-7+\beta b 3$         | 907.34739  |
| AEDVG+DAEF   | $\alpha 5-9+\beta 1-4$  | $\alpha i 5-9+\beta b 4$         | 916.36885  |
| FAEDVG+DAE   | $\alpha 4-9+\beta 1-3$  | $\alpha i 4-9+\beta b 3$         | 916.36885  |
| AEDVGSNK>+D  | $\alpha 5-12+\beta 1-1$ | $\alpha \gamma 8+\beta b 1$      | 916.40121  |
| EDVGSNK>+DA  | $\alpha 6-12+\beta 1-2$ | $\alpha \gamma 7+\beta b 2$      | 916.40121  |
| FAEDVGSN+D   | $\alpha 4-11+\beta 1-1$ | $\alpha i 4-11+\beta b 1$        | 917.3641   |
| <LVFFAED+D   | $\alpha 1-7+\beta 1-1$  | $\alpha b 7+\beta b 1$           | 919.42016  |
| EDVGS+DAEF   | $\alpha 6-10+\beta 1-4$ | $\alpha i 6-10+\beta b 4$        | 932.36376  |
| AED+DAEFR>   | $\alpha 5-7+\beta 1-5$  | $\alpha i 5-7+\beta \text{full}$ | 934.39065  |
| FFAEDVG+DA   | $\alpha 3-9+\beta 1-2$  | $\alpha i 3-9+\beta b 2$         | 934.39467  |
| VFFAEDVGS    | $\alpha 2-10$           | $\alpha i 2-10$                  | 934.43106  |
| FFAE+DAEF    | $\alpha 3-6+\beta 1-4$  | $\alpha i 3-6+\beta b 4$         | 939.38886  |
| FAEDVGSNK>   | $\alpha 4-12$           | $\alpha \gamma 9$                | 948.44268  |
| FFAEDVGSN    | $\alpha 3-11$           | $\alpha i 3-11$                  | 949.40557  |
| FFAEDVGS+D   | $\alpha 3-10+\beta 1-1$ | $\alpha i 3-10+\beta b 1$        | 950.38959  |
| <LVFFAEDVG   | $\alpha 1-9$            | $\alpha b 9$                     | 960.48309  |
| EDV+DAEFR>   | $\alpha 6-8+\beta 1-5$  | $\alpha i 6-8+\beta \text{full}$ | 962.42195  |
| VFFAEDVG+D   | $\alpha 2-9+\beta 1-1$  | $\alpha i 2-9+\beta b 1$         | 962.42597  |
| FAE+DAEFR>   | $\alpha 4-6+\beta 1-5$  | $\alpha i 4-6+\beta \text{full}$ | 966.43212  |
| AEDVGSN+DAE  | $\alpha 5-11+\beta 1-3$ | $\alpha i 5-11+\beta b 3$        | 970.37539  |
| VFFAEDV+DA   | $\alpha 2-8+\beta 1-2$  | $\alpha i 2-8+\beta b 2$         | 976.44162  |
| AEDVGSNK>+DA | $\alpha 5-12+\beta 1-2$ | $\alpha \gamma 8+\beta b 2$      | 987.43833  |
| FAEDVGSN+DA  | $\alpha 4-11+\beta 1-2$ | $\alpha i 4-11+\beta b 2$        | 988.40121  |
| <LVFFAED+DA  | $\alpha 1-7+\beta 1-2$  | $\alpha b 7+\beta b 2$           | 990.45727  |
| AEDVGS+DAEF  | $\alpha 5-10+\beta 1-4$ | $\alpha i 5-10+\beta b 4$        | 1003.40088 |
| FAEDVGS+DAE  | $\alpha 4-10+\beta 1-3$ | $\alpha i 4-10+\beta b 3$        | 1003.40088 |
| <LVFFAE+DAE  | $\alpha 1-6+\beta 1-3$  | $\alpha b 6+\beta b 3$           | 1004.47292 |
| FAEDV+DAEF   | $\alpha 4-8+\beta 1-4$  | $\alpha i 4-8+\beta b 4$         | 1006.4158  |
| VFFAED+DAE   | $\alpha 2-7+\beta 1-3$  | $\alpha i 2-7+\beta b 3$         | 1006.4158  |
| FFAEDV+DAE   | $\alpha 3-8+\beta 1-3$  | $\alpha i 3-8+\beta b 3$         | 1006.4158  |
| <LVFFAEDV+D  | $\alpha 1-8+\beta 1-1$  | $\alpha b 8+\beta b 1$           | 1018.48857 |
| EDVG+DAEFR>  | $\alpha 6-9+\beta 1-5$  | $\alpha i 6-9+\beta \text{full}$ | 1019.44341 |
| FFAEDVGS+DA  | $\alpha 3-10+\beta 1-2$ | $\alpha i 3-10+\beta b 2$        | 1021.4267  |
| AEDV+DAEFR>  | $\alpha 5-8+\beta 1-5$  | $\alpha i 5-8+\beta \text{full}$ | 1033.45906 |
| VFFAEDVG+DA  | $\alpha 2-9+\beta 1-2$  | $\alpha i 2-9+\beta b 2$         | 1033.46308 |

|               |                         |                                   |            |
|---------------|-------------------------|-----------------------------------|------------|
| VFFAE+DAEF    | $\alpha 2-6+\beta 1-4$  | $\alpha i 2-6+\beta b 4$          | 1038.45727 |
| EDVGSNK>+DAE  | $\alpha 6-12+\beta 1-3$ | $\alpha \gamma 7+\beta b 3$       | 1045.44381 |
| EDVGSN+DAEF   | $\alpha 6-11+\beta 1-4$ | $\alpha i 6-11+\beta b 4$         | 1046.40669 |
| <LVFFAEDVGS   | $\alpha 1-10$           | $\alpha b 10$                     | 1047.51512 |
| VFFAEDVGSN    | $\alpha 2-11$           | $\alpha i 2-11$                   | 1048.47398 |
| VFFAEDVGS+D   | $\alpha 2-10+\beta 1-1$ | $\alpha i 2-10+\beta b 1$         | 1049.458   |
| FFAED+DAEF    | $\alpha 3-7+\beta 1-4$  | $\alpha i 3-7+\beta b 4$          | 1054.4158  |
| FFAEDVG+DAE   | $\alpha 3-9+\beta 1-3$  | $\alpha i 3-9+\beta b 3$          | 1063.43726 |
| FAEDVG+DAEF   | $\alpha 4-9+\beta 1-4$  | $\alpha i 4-9+\beta b 4$          | 1063.43726 |
| FAEDVGSNK>+D  | $\alpha 4-12+\beta 1-1$ | $\alpha \gamma 9+\beta b 1$       | 1063.46963 |
| FFAEDVGSN+D   | $\alpha 3-11+\beta 1-1$ | $\alpha i 3-11+\beta b 1$         | 1064.43251 |
| <LVFFAEDVG+D  | $\alpha 1-9+\beta 1-1$  | $\alpha b 9+\beta b 1$            | 1075.51003 |
| FAED+DAEFR>   | $\alpha 4-7+\beta 1-5$  | $\alpha i 4-7+\beta \text{full}$  | 1081.45906 |
| <LVFFAEDV+DA  | $\alpha 1-8+\beta 1-2$  | $\alpha b 8+\beta b 2$            | 1089.52568 |
| AEDVG+DAEFR>  | $\alpha 5-9+\beta 1-5$  | $\alpha i 5-9+\beta \text{full}$  | 1090.48052 |
| FFAEDVGSNK>   | $\alpha 3-12$           | $\alpha \gamma 10$                | 1095.5111  |
| VFFAEDV+DAE   | $\alpha 2-8+\beta 1-3$  | $\alpha i 2-8+\beta b 3$          | 1105.48421 |
| EDVGS+DAEFR>  | $\alpha 6-10+\beta 1-5$ | $\alpha i 6-10+\beta \text{full}$ | 1106.47544 |
| FFAE+DAEFR>   | $\alpha 3-6+\beta 1-5$  | $\alpha i 3-6+\beta \text{full}$  | 1113.50053 |
| AEDVGSNK>+DAE | $\alpha 5-12+\beta 1-3$ | $\alpha \gamma 8+\beta b 3$       | 1116.48092 |
| FAEDVGSN+DAE  | $\alpha 4-11+\beta 1-3$ | $\alpha i 4-11+\beta b 3$         | 1117.44381 |
| AEDVGSN+DAEF  | $\alpha 5-11+\beta 1-4$ | $\alpha i 5-11+\beta b 4$         | 1117.44381 |
| <LVFFAED+DAE  | $\alpha 1-7+\beta 1-3$  | $\alpha b 7+\beta b 3$            | 1119.49986 |
| VFFAEDVGS+DA  | $\alpha 2-10+\beta 1-2$ | $\alpha i 2-10+\beta b 2$         | 1120.49511 |
| FAEDVGSNK>+DA | $\alpha 4-12+\beta 1-2$ | $\alpha \gamma 9+\beta b 2$       | 1134.50674 |
| FFAEDVGSN+DA  | $\alpha 3-11+\beta 1-2$ | $\alpha i 3-11+\beta b 2$         | 1135.46963 |
| <LVFFAEDVG+DA | $\alpha 1-9+\beta 1-2$  | $\alpha b 9+\beta b 2$            | 1146.54715 |
| FFAEDVGS+DAE  | $\alpha 3-10+\beta 1-3$ | $\alpha i 3-10+\beta b 3$         | 1150.46929 |
| FAEDVGS+DAEF  | $\alpha 4-10+\beta 1-4$ | $\alpha i 4-10+\beta b 4$         | 1150.46929 |
| <LVFFAE+DAEF  | $\alpha 1-6+\beta 1-4$  | $\alpha b 6+\beta b 4$            | 1151.54133 |
| VFFAED+DAEF   | $\alpha 2-7+\beta 1-4$  | $\alpha i 2-7+\beta b 4$          | 1153.48421 |
| FFAEDV+DAEF   | $\alpha 3-8+\beta 1-4$  | $\alpha i 3-8+\beta b 4$          | 1153.48421 |
| <LVFFAEDVGSN  | $\alpha 1-11$           | $\alpha b 11$                     | 1161.55805 |
| VFFAEDVG+DAE  | $\alpha 2-9+\beta 1-3$  | $\alpha i 2-9+\beta b 3$          | 1162.50568 |
| <LVFFAEDVGS+D | $\alpha 1-10+\beta 1-1$ | $\alpha b 10+\beta b 1$           | 1162.54206 |
| VFFAEDVGSN+D  | $\alpha 2-11+\beta 1-1$ | $\alpha i 2-11+\beta b 1$         | 1163.50093 |
| AEDVGS+DAEFR> | $\alpha 5-10+\beta 1-5$ | $\alpha i 5-10+\beta \text{full}$ | 1177.51255 |
| FAEDV+DAEFR>  | $\alpha 4-8+\beta 1-5$  | $\alpha i 4-8+\beta \text{full}$  | 1180.52747 |
| EDVGSNK>+DAEF | $\alpha 6-12+\beta 1-4$ | $\alpha \gamma 7+\beta b 4$       | 1192.51222 |
| VFFAEDVGSNK>  | $\alpha 2-12$           | $\alpha \gamma 11$                | 1194.57951 |



|                 |                         |                            |            |
|-----------------|-------------------------|----------------------------|------------|
| FFAEDVG+DAEF    | $\alpha 3-9+\beta 1-4$  | $\alpha i 3-9+\beta b 4$   | 1210.50568 |
| FFAEDVGSNK>+D   | $\alpha 3-12+\beta 1-1$ | $\alpha y 10+\beta b 1$    | 1210.53804 |
| VFFAE+DAEFR>    | $\alpha 2-6+\beta 1-5$  | $\alpha i 2-6+\beta full$  | 1212.56895 |
| <LVFFAEDV+DAE   | $\alpha 1-8+\beta 1-3$  | $\alpha b 8+\beta b 3$     | 1218.56828 |
| EDVGSN+DAEFR>   | $\alpha 6-11+\beta 1-5$ | $\alpha i 6-11+\beta full$ | 1220.51837 |
| FFAED+DAEFR>    | $\alpha 3-7+\beta 1-5$  | $\alpha i 3-7+\beta full$  | 1228.52747 |
| <LVFFAEDVGS+DA  | $\alpha 1-10+\beta 1-2$ | $\alpha b 10+\beta b 2$    | 1233.57918 |
| VFFAEDVGSN+DA   | $\alpha 2-11+\beta 1-2$ | $\alpha i 2-11+\beta b 2$  | 1234.53804 |
| FAEDVG+DAEFR>   | $\alpha 4-9+\beta 1-5$  | $\alpha i 4-9+\beta full$  | 1237.54894 |
| VFFAEDVGS+DAE   | $\alpha 2-10+\beta 1-3$ | $\alpha i 2-10+\beta b 3$  | 1249.53771 |
| VFFAEDV+DAEF    | $\alpha 2-8+\beta 1-4$  | $\alpha i 2-8+\beta b 4$   | 1252.55263 |
| AEDVGSNK>+DAEF  | $\alpha 5-12+\beta 1-4$ | $\alpha y 8+\beta b 4$     | 1263.54933 |
| FAEDVGSNK>+DAE  | $\alpha 4-12+\beta 1-3$ | $\alpha y 9+\beta b 3$     | 1263.54933 |
| FFAEDVGSN+DAE   | $\alpha 3-11+\beta 1-3$ | $\alpha i 3-11+\beta b 3$  | 1264.51222 |
| FAEDVGSN+DAEF   | $\alpha 4-11+\beta 1-4$ | $\alpha i 4-11+\beta b 4$  | 1264.51222 |
| <LVFFAED+DAEF   | $\alpha 1-7+\beta 1-4$  | $\alpha b 7+\beta b 4$     | 1266.56828 |
| <LVFFAEDVG+DAE  | $\alpha 1-9+\beta 1-3$  | $\alpha b 9+\beta b 3$     | 1275.58974 |
| <LVFFAEDVGSN+D  | $\alpha 1-11+\beta 1-1$ | $\alpha b 11+\beta b 1$    | 1276.58499 |
| FFAEDVGSNK>+DA  | $\alpha 3-12+\beta 1-2$ | $\alpha y 10+\beta b 2$    | 1281.57515 |
| AEDVGSN+DAEFR>  | $\alpha 5-11+\beta 1-5$ | $\alpha i 5-11+\beta full$ | 1291.55548 |
| FFAEDVGS+DAEF   | $\alpha 3-10+\beta 1-4$ | $\alpha i 3-10+\beta b 4$  | 1297.53771 |
| <LVFFAEDVGSNK>  | $\alpha 1-12$           | $\alpha full$              | 1307.66357 |
| VFFAEDVG+DAEF   | $\alpha 2-9+\beta 1-4$  | $\alpha i 2-9+\beta b 4$   | 1309.57409 |
| VFFAEDVGSNK>+D  | $\alpha 2-12+\beta 1-1$ | $\alpha y 11+\beta b 1$    | 1309.60645 |
| FAEDVGS+DAEFR>  | $\alpha 4-10+\beta 1-5$ | $\alpha i 4-10+\beta full$ | 1324.58097 |
| <LVFFAE+DAEFR>  | $\alpha 1-6+\beta 1-5$  | $\alpha b 6+\beta full$    | 1325.65301 |
| FFAEDV+DAEFR>   | $\alpha 3-8+\beta 1-5$  | $\alpha i 3-8+\beta full$  | 1327.59589 |
| VFFAED+DAEFR>   | $\alpha 2-7+\beta 1-5$  | $\alpha i 2-7+\beta full$  | 1327.59589 |
| <LVFFAEDVGSN+DA | $\alpha 1-11+\beta 1-2$ | $\alpha b 11+\beta b 2$    | 1347.6221  |
| <LVFFAEDVGS+DAE | $\alpha 1-10+\beta 1-3$ | $\alpha b 10+\beta b 3$    | 1362.62177 |
| VFFAEDVGSN+DAE  | $\alpha 2-11+\beta 1-3$ | $\alpha i 2-11+\beta b 3$  | 1363.58063 |
| <LVFFAEDV+DAEF  | $\alpha 1-8+\beta 1-4$  | $\alpha b 8+\beta b 4$     | 1365.63669 |
| EDVGSNK>+DAEFR> | $\alpha 6-12+\beta 1-5$ | $\alpha y 7+\beta full$    | 1366.62389 |
| VFFAEDVGSNK>+DA | $\alpha 2-12+\beta 1-2$ | $\alpha y 11+\beta b 2$    | 1380.64357 |
| FFAEDVG+DAEFR>  | $\alpha 3-9+\beta 1-5$  | $\alpha i 3-9+\beta full$  | 1384.61735 |
| VFFAEDVGS+DAEF  | $\alpha 2-10+\beta 1-4$ | $\alpha i 2-10+\beta b 4$  | 1396.60612 |
| FFAEDVGSNK>+DAE | $\alpha 3-12+\beta 1-3$ | $\alpha y 10+\beta b 3$    | 1410.61775 |
| FAEDVGSNK>+DAEF | $\alpha 4-12+\beta 1-4$ | $\alpha y 9+\beta b 4$     | 1410.61775 |
| FFAEDVGSN+DAEF  | $\alpha 3-11+\beta 1-4$ | $\alpha i 3-11+\beta b 4$  | 1411.58063 |
| <LVFFAEDVG+DAEF | $\alpha 1-9+\beta 1-4$  | $\alpha b 9+\beta b 4$     | 1422.65815 |

|                       |                         |                                        |            |
|-----------------------|-------------------------|----------------------------------------|------------|
| <LVFFAEDVGSNK>+D      | $\alpha 1-12+\beta 1-1$ | $\alpha \text{full}+\beta b 1$         | 1422.69052 |
| VFFAEDV+DAEFR>        | $\alpha 2-8+\beta 1-5$  | $\alpha i 2-8+\beta \text{full}$       | 1426.6643  |
| AEDVGSNK>+DAEFR>      | $\alpha 5-12+\beta 1-5$ | $\alpha y 8+\beta \text{full}$         | 1437.66101 |
| FAEDVGSN+DAEFR>       | $\alpha 4-11+\beta 1-5$ | $\alpha i 4-11+\beta \text{full}$      | 1438.62389 |
| <LVFFAED+DAEFR>       | $\alpha 1-7+\beta 1-5$  | $\alpha b 7+\beta \text{full}$         | 1440.67995 |
| FFAEDVGS+DAEFR>       | $\alpha 3-10+\beta 1-5$ | $\alpha i 3-10+\beta \text{full}$      | 1471.64938 |
| <LVFFAEDVGSN+DAE      | $\alpha 1-11+\beta 1-3$ | $\alpha b 11+\beta b 3$                | 1476.6647  |
| VFFAEDVG+DAEFR>       | $\alpha 2-9+\beta 1-5$  | $\alpha i 2-9+\beta \text{full}$       | 1483.68577 |
| <LVFFAEDVGSNK>+DA     | $\alpha 1-12+\beta 1-2$ | $\alpha \text{full}+\beta b 2$         | 1493.72763 |
| VFFAEDVGSNK>+DAE      | $\alpha 2-12+\beta 1-3$ | $\alpha y 11+\beta b 3$                | 1509.68616 |
| <LVFFAEDVGS+DAEF      | $\alpha 1-10+\beta 1-4$ | $\alpha b 10+\beta b 4$                | 1509.69018 |
| VFFAEDVGSN+DAEF       | $\alpha 2-11+\beta 1-4$ | $\alpha i 2-11+\beta b 4$              | 1510.64905 |
| <LVFFAEDV+DAEFR>      | $\alpha 1-8+\beta 1-5$  | $\alpha b 8+\beta \text{full}$         | 1539.74837 |
| FFAEDVGSNK>+DAEF      | $\alpha 3-12+\beta 1-4$ | $\alpha y 10+\beta b 4$                | 1557.68616 |
| VFFAEDVGS+DAEFR>      | $\alpha 2-10+\beta 1-5$ | $\alpha i 2-10+\beta \text{full}$      | 1570.71779 |
| FAEDVGSNK>+DAEFR>     | $\alpha 4-12+\beta 1-5$ | $\alpha y 9+\beta \text{full}$         | 1584.72942 |
| FFAEDVGSN+DAEFR>      | $\alpha 3-11+\beta 1-5$ | $\alpha i 3-11+\beta \text{full}$      | 1585.69231 |
| <LVFFAEDVG+DAEFR>     | $\alpha 1-9+\beta 1-5$  | $\alpha b 9+\beta \text{full}$         | 1596.76983 |
| <LVFFAEDVGSNK>+DAE    | $\alpha 1-12+\beta 1-3$ | $\alpha \text{full}+\beta b 3$         | 1622.77022 |
| <LVFFAEDVGSN+DAEF     | $\alpha 1-11+\beta 1-4$ | $\alpha b 11+\beta b 4$                | 1623.73311 |
| VFFAEDVGSNK>+DAEF     | $\alpha 2-12+\beta 1-4$ | $\alpha y 11+\beta b 4$                | 1656.75457 |
| <LVFFAEDVGS+DAEFR>    | $\alpha 1-10+\beta 1-5$ | $\alpha b 10+\beta \text{full}$        | 1683.80186 |
| VFFAEDVGSN+DAEFR>     | $\alpha 2-11+\beta 1-5$ | $\alpha i 2-11+\beta \text{full}$      | 1684.76072 |
| FFAEDVGSNK>+DAEFR>    | $\alpha 3-12+\beta 1-5$ | $\alpha y 10+\beta \text{full}$        | 1731.79783 |
| <LVFFAEDVGSNK>+DAEF   | $\alpha 1-12+\beta 1-4$ | $\alpha \text{full}+\beta b 4$         | 1769.83864 |
| <LVFFAEDVGSN+DAEFR>   | $\alpha 1-11+\beta 1-5$ | $\alpha b 11+\beta \text{full}$        | 1797.84478 |
| VFFAEDVGSNK>+DAEFR>   | $\alpha 2-12+\beta 1-5$ | $\alpha y 11+\beta \text{full}$        | 1830.86625 |
| <LVFFAEDVGSNK>+DAEFR> | $\alpha 1-12+\beta 1-5$ | $\alpha \text{full}+\beta \text{full}$ | 1943.95031 |







| PEAKS Studio MS/MS              |          |                          |
|---------------------------------|----------|--------------------------|
| m/z=972.4794                    |          |                          |
| Charge=2+                       |          |                          |
| RT=36.8 min                     |          |                          |
|                                 |          |                          |
| Deconvoluted [M+H] <sup>+</sup> | Signal   | Identification [≤20 ppm] |
| 101.107574                      | 3.22E+05 |                          |
| 112.086945                      | 3.81E+05 |                          |
| 113.07096                       | 6.48E+04 |                          |
| 115.08658                       | 1.50E+05 |                          |
| 116.07081                       | 3.65E+05 |                          |
| 120.080956                      | 1.28E+07 |                          |
| 121.0842                        | 1.20E+05 |                          |
| 129.10211                       | 9.04E+06 |                          |
| 130.08624                       | 1.78E+06 | αy1-NH3                  |
| 130.09749                       | 9.26E+04 |                          |
| 133.06064                       | 1.52E+05 |                          |
| 145.06055                       | 2.09E+05 |                          |
| 147.1126                        | 3.39E+06 | αy1                      |
| 153.12479                       | 9.54E+04 |                          |
| 157.09673                       | 2.76E+05 |                          |
| 157.1084                        | 2.35E+05 |                          |
| 167.09242                       | 8.76E+04 |                          |
| 175.11877                       | 4.77E+06 | βy1                      |
| 185.16461                       | 1.15E+07 |                          |
| 187.10728                       | 3.07E+05 |                          |
| 190.09734                       | 2.92E+05 |                          |
| 191.11792                       | 1.33E+05 |                          |
| 198.12387                       | 1.58E+05 |                          |
| 205.10083                       | 3.74E+05 |                          |
| 208.108                         | 1.11E+05 |                          |
| 209.09174                       | 6.33E+05 |                          |
| 213.098                         | 7.84E+04 |                          |
| 213.15948                       | 1.50E+07 | αb2                      |
| 215.10233                       | 3.39E+05 |                          |
| 219.11256                       | 2.74E+05 | αi4-5                    |
| 219.14876                       | 5.68E+05 |                          |
| 225.13422                       | 9.48E+04 |                          |
| 226.11824                       | 2.82E+06 |                          |
| 227.10254                       | 2.06E+05 |                          |

|           |          |         |
|-----------|----------|---------|
| 239.175   | 1.60E+05 |         |
| 241.09286 | 2.42E+05 |         |
| 242.07675 | 1.79E+05 |         |
| 244.12889 | 2.59E+06 | αy2-NH3 |
| 247.14372 | 1.04E+06 | αi2-3   |
| 259.10315 | 4.35E+05 |         |
| 261.15527 | 6.81E+06 | αy2     |
| 265.1545  | 1.23E+05 |         |
| 267.1489  | 3.94E+06 |         |
| 272.12378 | 2.19E+05 |         |
| 284.19647 | 3.61E+05 |         |
| 287.21136 | 2.15E+05 |         |
| 295.14368 | 2.91E+06 | αi3-4   |
| 296.12347 | 1.28E+05 |         |
| 305.1601  | 1.69E+06 | βy2-NH3 |
| 312.1661  | 1.18E+05 |         |
| 313.14978 | 1.13E+06 |         |
| 315.1769  | 8.35E+05 |         |
| 315.20593 | 2.13E+06 |         |
| 316.11353 | 1.40E+05 |         |
| 316.2096  | 1.25E+05 |         |
| 322.18695 | 2.06E+07 | βy2     |
| 330.1767  | 6.31E+05 | αy3-H2O |
| 331.16046 | 7.69E+05 | αy3-NH3 |
| 332.1963  | 2.83E+05 |         |
| 340.15964 | 1.96E+05 |         |
| 341.14502 | 2.40E+05 |         |
| 348.18732 | 5.97E+06 | αy3     |
| 352.16125 | 6.74E+05 |         |
| 358.17108 | 4.36E+05 |         |
| 359.15527 | 4.75E+05 |         |
| 360.2276  | 9.22E+06 | αb3     |
| 366.18066 | 1.89E+06 | αi3-5   |
| 367.2082  | 1.21E+05 |         |
| 369.1875  | 3.35E+05 |         |
| 370.17114 | 1.52E+06 |         |
| 376.18207 | 1.45E+05 | αi8-11  |
| 382.12366 | 2.02E+05 |         |
| 386.2432  | 3.29E+05 |         |

|           |          |                                                                    |
|-----------|----------|--------------------------------------------------------------------|
| 387.198   | 2.28E+06 | $\alpha\gamma_4\text{-H}_2\text{O}$                                |
| 388.18198 | 1.11E+06 | $\alpha\gamma_4\text{-NH}_3$                                       |
| 394.21188 | 9.98E+05 | $\alpha i_2\text{-4}$                                              |
| 403.1556  | 2.94E+05 |                                                                    |
| 403.2699  | 1.85E+05 |                                                                    |
| 405.20862 | 1.82E+07 | $\alpha\gamma_4$                                                   |
| 408.22882 | 2.58E+05 |                                                                    |
| 413.12933 | 1.79E+05 | $\alpha i_6\text{-7}+\beta b_2; \alpha i_5\text{-7}+\beta b_1$     |
| 416.19305 | 2.45E+05 |                                                                    |
| 422.20618 | 2.01E+05 |                                                                    |
| 431.26437 | 5.88E+05 |                                                                    |
| 433.21878 | 4.27E+05 | $\beta\gamma_3\text{-H}_2\text{O}$                                 |
| 434.2027  | 1.64E+05 | $\beta\gamma_3\text{-NH}_3$                                        |
| 445.172   | 1.94E+05 | $\alpha i_4\text{-7}+\beta\text{-}; \alpha i_4\text{-6}+\beta b_1$ |
| 451.2298  | 3.98E+06 | $\beta\gamma_3$                                                    |
| 451.26917 | 2.55E+05 |                                                                    |
| 455.1891  | 1.40E+05 |                                                                    |
| 456.17285 | 1.78E+05 |                                                                    |
| 462.2735  | 2.42E+05 |                                                                    |
| 465.24854 | 7.50E+05 | $\alpha i_2\text{-5}$                                              |
| 469.23993 | 3.30E+05 |                                                                    |
| 473.20023 | 1.23E+05 |                                                                    |
| 474.18207 | 2.92E+05 |                                                                    |
| 479.2649  | 9.49E+05 |                                                                    |
| 479.30112 | 1.73E+06 |                                                                    |
| 486.2664  | 9.44E+05 | $\alpha\gamma_5\text{-H}_2\text{O}$                                |
| 487.22995 | 1.59E+05 |                                                                    |
| 487.25137 | 7.50E+05 | $\alpha\gamma_5\text{-NH}_3$                                       |
| 493.24396 | 2.38E+05 |                                                                    |
| 504.2771  | 1.59E+07 | $\alpha\gamma_5$                                                   |
| 505.24246 | 3.15E+05 | $\beta\gamma_4\text{-NH}_3$                                        |
| 507.2959  | 1.32E+06 | $\alpha b_4$                                                       |
| 522.2665  | 2.78E+07 | $\beta\gamma_4$                                                    |
| 529.1936  | 1.53E+05 |                                                                    |
| 532.2517  | 8.02E+04 |                                                                    |
| 533.3113  | 4.19E+05 |                                                                    |
| 542.17334 | 1.27E+05 | $\alpha i_6\text{-7}+\beta b_3$                                    |
| 550.3382  | 6.89E+05 |                                                                    |
| 557.25287 | 7.60E+04 |                                                                    |
| 560.19684 | 7.34E+04 | $\alpha i_4\text{-7}+\beta b_1$                                    |



|           |          |                            |
|-----------|----------|----------------------------|
| 566.2563  | 5.87E+04 |                            |
| 578.3329  | 7.15E+05 | ab5                        |
| 584.26794 | 2.53E+05 |                            |
| 592.2392  | 1.93E+05 | ai3-7+β-; ai3-6+βb1        |
| 601.29346 | 5.20E+05 | αy6-H2O                    |
| 602.256   | 2.77E+05 |                            |
| 602.27783 | 5.55E+05 | αy6-NH3                    |
| 619.3032  | 7.58E+06 | αy6                        |
| 620.2666  | 7.54E+05 | βy5-NH3                    |
| 637.29285 | 4.58E+06 | βy5                        |
| 703.30273 | 1.56E+06 |                            |
| 707.267   | 3.12E+05 | ai3-7+βb1                  |
| 710.3287  | 2.62E+05 |                            |
| 710.81805 | 2.68E+05 |                            |
| 729.3535  | 8.24E+04 |                            |
| 730.33594 | 3.31E+05 | αy7+β-                     |
| 748.32544 | 1.54E+05 | ai6+βfull; ai3-9+β-        |
| 756.37756 | 1.87E+05 |                            |
| 783.3616  | 1.09E+05 |                            |
| 792.31805 | 2.13E+05 | ai3-6+βb3; ai4-6+βb4       |
| 802.33765 | 2.25E+05 | ai5-6+βfull-NH3; ai4-11+β- |
| 804.3911  | 3.53E+05 | ab7+β-; ab6+βb1            |
| 806.3345  | 2.04E+05 | ai3-8+βb1; ai2-7+βb1       |
| 819.36176 | 6.58E+05 | ai5-6+βfull                |
| 827.3511  | 2.15E+05 |                            |
| 833.3989  | 2.46E+05 |                            |
| 839.87964 | 1.33E+05 |                            |
| 845.36285 | 3.24E+05 | ai3-9+βb1-H2O; αy7+βb1     |
| 847.3613  | 1.21E+05 |                            |
| 848.39246 | 1.45E+05 |                            |
| 849.3845  | 1.53E+05 |                            |
| 858.3921  | 2.83E+05 |                            |
| 863.3517  | 2.13E+06 | ai6-7+βfull; ai3-9+βb1     |
| 866.90234 | 1.32E+06 |                            |
| 880.3805  | 1.41E+05 |                            |
| 917.40076 | 1.92E+05 |                            |
| 919.4206  | 2.87E+05 | ab7+βb1                    |
| 921.42786 | 2.15E+05 |                            |
| 934.389   | 3.18E+06 | ai5-7+βfull; ai3-9+βb2     |
| 944.4397  | 2.10E+05 |                            |

|            |          |                                                             |
|------------|----------|-------------------------------------------------------------|
| 955.463    | 3.91E+05 |                                                             |
| 962.4217   | 3.64E+05 | $\alpha_{i6-8}+\beta_{full}$ ; $\alpha_{i2-9}+\beta_{b1}$   |
| 966.4285   | 9.49E+05 | $\alpha_{i4-6}+\beta_{full}$                                |
| 972.3748   | 9.18E+04 |                                                             |
| 1005.46375 | 2.21E+05 |                                                             |
| 1006.41315 | 6.45E+04 |                                                             |
| 1009.47626 | 7.82E+04 |                                                             |
| 1018.4907  | 3.10E+05 | $\alpha_{b8}+\beta_{b1}$                                    |
| 1019.44055 | 2.45E+05 | $\alpha_{i6-9}+\beta_{full}$                                |
| 1027.4294  | 5.32E+04 |                                                             |
| 1033.4595  | 7.15E+05 | $\alpha_{i5-8}+\beta_{full}$ ; $\alpha_{i2-9}+\beta_{b2}$   |
| 1034.4602  | 9.27E+03 |                                                             |
| 1045.4424  | 3.62E+05 | $\alpha_{y7}+\beta_{b3}$                                    |
| 1047.44    | 3.53E+04 |                                                             |
| 1063.469   | 4.65E+05 | $\alpha_{i4-7}+\beta_{full-H2O}$ ; $\alpha_{y9}+\beta_{b1}$ |
| 1064.4692  | 5.41E+04 |                                                             |
| 1078.4832  | 4.74E+04 |                                                             |
| 1081.457   | 3.87E+06 | $\alpha_{i4-7}+\beta_{full}$                                |
| 1082.4604  | 1.28E+05 |                                                             |
| 1085.5037  | 2.01E+05 |                                                             |
| 1086.5061  | 1.76E+04 |                                                             |
| 1089.5186  | 4.27E+04 |                                                             |
| 1090.4724  | 4.48E+05 | $\alpha_{i5-9}+\beta_{full}$                                |
| 1091.4817  | 1.36E+04 |                                                             |
| 1095.5039  | 8.14E+04 |                                                             |
| 1098.4795  | 1.81E+05 |                                                             |
| 1106.4731  | 2.63E+05 | $\alpha_{i6-10}+\beta_{full}$                               |
| 1107.4788  | 1.43E+04 |                                                             |
| 1113.4971  | 1.94E+06 | $\alpha_{i3-6}+\beta_{full}$                                |
| 1116.4795  | 3.24E+05 | $\alpha_{y8}+\beta_{b3}$                                    |
| 1119.4937  | 2.59E+05 | $\alpha_{b7}+\beta_{b3}$                                    |
| 1123.4962  | 5.81E+04 |                                                             |
| 1132.5195  | 8.42E+04 |                                                             |
| 1135.504   | 1.55E+05 |                                                             |
| 1144.5234  | 5.26E+04 |                                                             |
| 1152.5286  | 8.41E+05 |                                                             |
| 1156.5383  | 1.37E+05 |                                                             |
| 1159.5007  | 1.43E+05 |                                                             |

|           |          |                                                                   |
|-----------|----------|-------------------------------------------------------------------|
| 1160.4993 | 3.28E+03 |                                                                   |
| 1168.4946 | 6.38E+04 |                                                                   |
| 1174.4988 | 4.79E+04 |                                                                   |
| 1177.5121 | 3.54E+05 | $\alpha i5-10+\beta full$                                         |
| 1180.5271 | 1.17E+06 | $\alpha i4-8+\beta full$                                          |
| 1181.5264 | 1.10E+04 |                                                                   |
| 1192.5176 | 5.10E+05 | $\alpha y7+\beta b4$                                              |
| 1193.5164 | 2.60E+04 |                                                                   |
| 1194.5295 | 1.19E+05 |                                                                   |
| 1202.5048 | 8.71E+04 |                                                                   |
| 1203.4979 | 7.20E+04 |                                                                   |
| 1210.5359 | 1.53E+06 | $\alpha i3-7+\beta full-H2O; \alpha y10+\beta b1$                 |
| 1212.5657 | 2.59E+05 | $\alpha i2-6+\beta full$                                          |
| 1214.5757 | 1.95E+04 |                                                                   |
| 1220.5144 | 3.08E+05 | $\alpha i6-11+\beta full; \alpha i4-9+\beta full-NH3$             |
| 1221.5005 | 5.50E+05 |                                                                   |
| 1222.5092 | 1.61E+04 |                                                                   |
| 1228.5247 | 1.04E+07 | $\alpha i3-7+\beta full$                                          |
| 1236.544  | 7.52E+04 |                                                                   |
| 1237.547  | 4.15E+05 | $\alpha i4-9+\beta full$                                          |
| 1238.5361 | 5.14E+05 |                                                                   |
| 1239.5282 | 4.96E+05 |                                                                   |
| 1240.5312 | 5.57E+03 |                                                                   |
| 1245.5482 | 2.88E+05 | $\alpha y9+\beta b3-H2O; \alpha y8+\beta b4-H2O$                  |
| 1246.5537 | 4.28E+04 |                                                                   |
| 1247.5442 | 5.00E+04 |                                                                   |
| 1263.5516 | 1.16E+06 | $\alpha y9+\beta b3; \alpha y8+\beta b4; \alpha y10+\beta b2-H2O$ |
| 1273.542  | 1.42E+05 | $\alpha i5-11+\beta full-H2O$                                     |
| 1274.5323 | 9.21E+04 | $\alpha i5-11+\beta full-NH3$                                     |
| 1281.5703 | 1.69E+05 | $\alpha y10+\beta b2$                                             |
| 1282.5737 | 2.29E+05 |                                                                   |
| 1291.5488 | 3.98E+05 | $\alpha i5-11+\beta full; \alpha i2-9+\beta b4-H2O$               |
| 1292.5448 | 1.08E+06 |                                                                   |
| 1297.6564 | 2.66E+06 |                                                                   |
| 1298.6592 | 1.09E+05 |                                                                   |
| 1299.5947 | 1.34E+06 |                                                                   |
| 1307.6559 | 2.80E+05 | $\alpha b6+\beta full-H2O; \alpha full+\beta-$                    |
| 1309.5668 | 5.85E+05 | $\alpha i2-9+\beta b4; \alpha i3-8+\beta full-H2O; \alpha i2-$    |

|           |          |                                  |
|-----------|----------|----------------------------------|
|           |          | 7+βfull-H2O                      |
| 1310.5605 | 4.06E+05 | αi3-8+βfull-NH3; αi2-7+βfull-NH3 |
| 1324.5757 | 2.01E+05 | αi4-10+βfull                     |
| 1325.6506 | 7.05E+06 | αb6+βfull                        |
| 1326.6534 | 3.36E+05 |                                  |
| 1327.5912 | 4.81E+06 | αi3-8+βfull; αi2-7+βfull         |
| 1331.5798 | 4.16E+05 |                                  |
| 1342.6659 | 4.18E+05 |                                  |
| 1343.669  | 2.45E+05 |                                  |
| 1348.6091 | 8.00E+05 | αy7+βfull-H2O                    |
| 1349.6013 | 2.94E+06 | αy7+βfull-NH3                    |
| 1366.6213 | 1.45E+07 | αi3-9+βfull-H2O; αy7+βfull       |
| 1367.6248 | 2.72E+05 |                                  |
| 1368.6926 | 4.43E+05 |                                  |
| 1369.705  | 4.91E+05 |                                  |
| 1377.6248 | 1.89E+05 |                                  |
| 1384.6143 | 1.52E+06 | αi3-9+βfull                      |
| 1402.6284 | 6.12E+05 |                                  |
| 1404.6761 | 3.82E+05 | αfull+βb1-H2O                    |
| 1405.6792 | 2.47E+05 | αfull+βb1-NH3                    |
| 1410.6161 | 1.76E+06 | αy10+βb3; αy9+βb4                |
| 1419.65   | 9.71E+05 | αy8+βfull-H2O                    |
| 1420.6381 | 3.02E+06 | αy8+βfull-NH3                    |
| 1422.6897 | 8.55E+06 | αb7+βfull-H2O; αfull+βb1         |
| 1423.6927 | 1.07E+06 |                                  |
| 1426.6597 | 5.50E+05 | αi2-8+βfull                      |
| 1437.6595 | 2.09E+07 | αy8+βfull                        |
| 1438.6625 | 1.85E+05 |                                  |
| 1439.6578 | 1.55E+06 |                                  |
| 1440.6779 | 3.20E+07 | αb7+βfull                        |
| 1441.6808 | 1.05E+06 |                                  |
| 1444.6793 | 1.96E+05 |                                  |
| 1453.6361 | 5.35E+05 | αi3-10+βfull-H2O                 |
| 1454.6377 | 3.18E+03 |                                  |
| 1455.6428 | 9.05E+04 |                                  |
| 1456.6332 | 9.23E+05 |                                  |
| 1457.636  | 5.55E+03 |                                  |
| 1471.6467 | 1.35E+06 | αi3-10+βfull                     |
| 1472.6498 | 2.18E+05 |                                  |
| 1483.6836 | 1.30E+05 | αi2-9+βfull                      |

|           |          |                                         |
|-----------|----------|-----------------------------------------|
| 1484.6866 | 6.99E+04 |                                         |
| 1488.6654 | 2.74E+05 |                                         |
| 1489.6685 | 7.59E+04 |                                         |
| 1493.7245 | 8.79E+05 | $\alpha\text{full}+\beta\text{b2}$      |
| 1494.7313 | 6.13E+04 |                                         |
| 1495.7344 | 3.46E+04 |                                         |
| 1510.686  | 5.86E+04 |                                         |
| 1511.7524 | 2.46E+06 |                                         |
| 1523.7208 | 5.58E+04 |                                         |
| 1527.7202 | 5.44E+04 |                                         |
| 1539.7456 | 1.11E+07 | $\alpha\text{b8}+\beta\text{full}$      |
| 1540.7502 | 8.28E+05 |                                         |
| 1548.694  | 2.23E+05 |                                         |
| 1549.6895 | 4.25E+05 |                                         |
| 1553.7783 | 1.07E+05 |                                         |
| 1557.687  | 7.76E+05 | $\alpha\text{y10}+\beta\text{b4}$       |
| 1559.6925 | 3.32E+04 |                                         |
| 1566.7214 | 1.92E+06 | $\alpha\text{y9}+\beta\text{full-H2O}$  |
| 1567.7048 | 1.99E+06 | $\alpha\text{y9}+\beta\text{full-NH3}$  |
| 1568.6936 | 1.25E+06 |                                         |
| 1569.7727 | 2.86E+05 |                                         |
| 1579.7554 | 6.60E+04 |                                         |
| 1584.727  | 2.72E+07 | $\alpha\text{y9}+\beta\text{full}$      |
| 1587.6802 | 8.85E+05 |                                         |
| 1594.7731 | 2.94E+05 |                                         |
| 1595.7761 | 4.07E+04 |                                         |
| 1596.7655 | 6.71E+06 | $\alpha\text{b9}+\beta\text{full}$      |
| 1597.7686 | 5.12E+05 |                                         |
| 1603.7028 | 6.13E+05 |                                         |
| 1604.6903 | 7.76E+05 |                                         |
| 1606.7424 | 1.95E+05 |                                         |
| 1614.7795 | 2.39E+05 |                                         |
| 1622.7677 | 4.45E+06 | $\alpha\text{full}+\beta\text{b3}$      |
| 1623.7703 | 8.59E+04 |                                         |
| 1638.7766 | 2.34E+05 |                                         |
| 1653.7899 | 1.60E+05 |                                         |
| 1654.793  | 1.88E+04 |                                         |
| 1655.808  | 1.88E+06 |                                         |
| 1656.811  | 8.06E+04 |                                         |
| 1665.7914 | 1.30E+06 | $\alpha\text{b10}+\beta\text{full-H2O}$ |

|           |          |                |
|-----------|----------|----------------|
| 1667.7941 | 3.70E+04 |                |
| 1672.7594 | 1.01E+05 |                |
| 1683.7994 | 4.31E+06 | αb10+βfull     |
| 1684.8025 | 3.92E+05 |                |
| 1696.7573 | 1.57E+06 |                |
| 1697.7554 | 1.41E+04 |                |
| 1698.7504 | 2.04E+05 |                |
| 1700.8257 | 3.38E+05 |                |
| 1713.783  | 4.65E+06 | αy10+βfull-H2O |
| 1714.7754 | 6.26E+06 | αy10+βfull-NH3 |
| 1731.7946 | 6.12E+07 | αy10+βfull     |
| 1732.7976 | 3.54E+05 |                |
| 1741.8433 | 6.57E+04 |                |
| 1742.8424 | 1.24E+05 |                |
| 1743.8455 | 1.82E+04 |                |
| 1751.8202 | 1.15E+05 | αfull+βb4-H2O  |
| 1752.8232 | 3.11E+04 |                |
| 1769.8405 | 1.69E+06 | αfull+βb4      |
| 1770.8435 | 1.74E+05 |                |
| 1779.8291 | 4.83E+05 | αb11+βfull-H2O |
| 1781.8257 | 9.39E+04 |                |
| 1787.8423 | 2.60E+05 |                |
| 1797.8363 | 4.38E+06 | αb11+βfull     |
| 1798.8394 | 1.54E+06 |                |
| 1812.8387 | 6.00E+05 | αy11+βfull-H2O |
| 1813.8418 | 5.43E+05 | αy11+βfull-NH3 |
| 1814.8547 | 6.39E+04 |                |
| 1815.8531 | 2.68E+06 |                |
| 1816.8562 | 1.39E+05 |                |
| 1830.8601 | 9.29E+06 | αy11+βfull     |
| 1839.8419 | 7.15E+05 |                |
| 1907.9122 | 2.16E+06 |                |
| 1925.9313 | 1.45E+07 | Precursor-H2O  |
| 1926.9303 | 7.48E+05 | Precursor-NH3  |
| 1943.9463 | 1.89E+08 | Precursor      |
